# Supplementary material for: Mutant huntingtin induces neuronal apoptosis via derepressing the non-canonical poly(A) polymerase PAPD5
Source: Research Square preprint supplement (doi:10.21203/rs.3.rs-2983878/v1), 2024-06-05
Supplement: Supplementary file 1 [file 4a9fe134df64299ee45ec059.xlsx]

## Sheet: Set 1
down-regulated miRNAs	Set 1
	Ct							delta Ct							delta delta Ct							fold
	un	un+P5 si	E27	E27+P5 si	E78	E78+P5 si		un	un+P5 si	E27	E27+P5 si	E78	E78+P5 si			un+P5 si	E27	E27+P5 si	E78	E78+P5 si			un+P5 si	E27	E27+P5 si	E78	E78+P5 si
hsa-let-7b-5p	22.3694	22.8603	22.8426	22.2099	23.4392	22.9418		-10.1304	-10.1327	-10	-10.289	-9.20532	-10.0489			-0.002293	0.130399	-0.158531	0.925116	0.081552			1.00159	0.913579	1.11615	0.526638	0.94504
hsa-let-7c-5p	23.2984	23.7426	23.4683	23.0448	24.6335	23.7223		-9.20145	-9.25048	-9.37427	-9.45406	-8.01104	-9.26842			-0.049036	-0.172825	-0.252608	1.1904	-0.066971			1.03457	1.12726	1.19136	0.43818	1.04752
hsa-let-7e-3p	28.9165	29.2777	29.1302	29	30.4664	29.533		-3.58334	-3.7154	-3.71244	-3.49889	-2.17808	-3.45773			-0.132066	-0.129105	0.0844456	1.40526	0.125603			1.09586	1.09361	0.943147	0.377551	0.916621
hsa-let-7g-5p	21.5379	21.9422	21.7758	21.5493	22.5387	22.1589		-10.9619	-11.0509	-11.0668	-10.9495	-10.1058	-10.8318			-0.088935	-0.104891	0.012371	0.85609	0.130093			1.06358	1.07541	0.991462	0.552448	0.913773
hsa-let-7i-5p	26.6953	27.1368	27.141	26.7925	27.4302	27.3148		-5.80461	-5.85621	-5.70163	-5.70641	-5.21434	-5.67592			-0.051598	0.102983	0.0982	0.590276	0.128696			1.03641	0.931106	0.934198	0.664216	0.914658
hsa-miR-101-3p	20.9411	21.3972	21.3388	20.8864	21.7642	21.3329		-11.5587	-11.5959	-11.5038	-11.6125	-10.8803	-11.6578			-0.037123	0.054962	-0.053769	0.678421	-0.099049			1.02607	0.96262	1.03797	0.624849	1.07107
hsa-miR-103a-3p	19.6229	20.058	20.0443	19.6633	20.4027	19.9953		-12.877	-12.9351	-12.7983	-12.8356	-12.2418	-12.9954			-0.058112	0.078658	0.041364	0.6352	-0.118386			1.0411	0.946938	0.971736	0.643852	1.08552
hsa-miR-106b-3p	24.9861	25.3468	25.3776	25.0072	25.7274	25.3965		-7.51378	-7.64623	-7.46498	-7.49173	-6.91715	-7.59424			-0.132455	0.0487972	0.0220522	0.596632	-0.080457			1.09616	0.966742	0.984831	0.661296	1.05735
hsa-miR-106b-5p	19.7197	20.254	20.0692	19.6699	20.5873	20.2629		-12.7802	-12.7391	-12.7734	-12.829	-12.0572	-12.7279			0.041144	0.00681	-0.048783	0.722986	0.052357			0.971884	0.995291	1.03439	0.605842	0.96436
hsa-miR-10a-3p	35.6518	35.9942	35.9491	35.5691	37.3044	35.9752		3.15189	3.00114	3.10653	3.07018	4.65994	2.98453			-0.15075	-0.045361	-0.0817106	1.50806	-0.167358			1.11015	1.03194	1.05827	0.351585	1.123
hsa-miR-10a-5p	31.3758	31.9793	31.612	31.2804	32.6751	32.0008		-1.12404	-1.01379	-1.23057	-1.21853	0.030598	-0.989918			0.110254	-0.10653	-0.094485	1.15464	0.134124			0.926425	1.07664	1.06768	0.449178	0.911223
hsa-miR-10b-5p	21.5316	22.1103	21.9643	21.4533	22.4789	21.947		-10.9683	-10.8828	-10.8784	-11.0456	-10.1656	-11.0437			0.085544	0.089948	-0.07731	0.802739	-0.07537			0.942429	0.939557	1.05505	0.57326	1.05363
hsa-miR-1179	33.8095	34.0997	33.9832	33.7011	34.6033	34.1439		1.30962	1.10666	1.14058	1.20219	1.95876	1.15321			-0.202953	-0.169037	-0.107431	0.64914	-0.156402			1.15105	1.12431	1.07731	0.63766	1.1145
hsa-miR-122-5p	32.4958	32.9461	32.7461	32.2734	33.1764	32.8209		-0.004089	-0.046976	-0.096537	-0.22554	0.531887	-0.169858			-0.042887	-0.092448	-0.221451	0.535976	-0.165769			1.03017	1.06618	1.16591	0.689692	1.12176
hsa-miR-1243	34.1169	34.5473	34.3174	33.9912	34.7325	34.4964		1.61703	1.55428	1.47482	1.49227	2.08803	1.50567			-0.0627525	-0.142216	-0.124757	0.471	-0.111358			1.04446	1.1036	1.09032	0.721464	1.08024
hsa-miR-1249	33.5517	33.9767	33.8163	33.532	35.7312	34.1345		1.05183	0.983693	0.973671	1.0331	3.08669	1.14383			-0.0681335	-0.078156	-0.0187261	2.03487	0.0919998			1.04836	1.05567	1.01306	0.244031	0.938221
hsa-miR-125a-3p	28.5814	28.9429	29.0086	28.598	29.2009	28.9667		-3.9185	-4.05015	-3.83404	-3.90088	-3.44359	-4.02405			-0.131649	0.0844611	0.0176184	0.474908	-0.105547			1.09555	0.943137	0.987862	0.719513	1.0759
hsa-miR-125b-5p	21.7963	22.2002	22.1299	21.8021	22.8465	22.0516		-10.7036	-10.7928	-10.7127	-10.6968	-9.79804	-10.9391			-0.089217	-0.009091	0.006824	0.905554	-0.235509			1.06379	1.00632	0.995281	0.533828	1.17732
hsa-miR-126-3p	21.1816	21.7387	21.5773	21.2123	21.9766	21.7864		-11.3182	-11.2544	-11.2653	-11.2866	-10.6679	-11.2043			0.063864	0.052945	0.031659	0.650349	0.113946			0.956698	0.963967	0.978295	0.637126	0.924057
hsa-miR-1269a	29.2854	29.5895	29.6812	29.162	30.4173	29.8367		-3.21452	-3.40352	-3.16137	-3.3369	-2.22719	-3.15406			-0.189	0.0531478	-0.12238	0.987329	0.060456			1.13997	0.963831	1.08853	0.504411	0.958961
hsa-miR-1271-5p	28.6032	28.995	28.9262	28.4117	29.3249	28.9723		-3.89664	-3.99807	-3.91637	-4.08719	-3.31963	-4.01837			-0.101429	-0.0197282	-0.190549	0.577012	-0.121733			1.07284	1.01377	1.1412	0.670351	1.08804
hsa-miR-1296-5p	26.3305	26.8628	26.594	26.3641	26.8894	26.7145		-6.16933	-6.13028	-6.24859	-6.13479	-5.75506	-6.27619			0.0390438	-0.0792638	0.0345381	0.414264	-0.106862			0.9733	1.05648	0.976344	0.750402	1.07688
hsa-miR-132-3p	24.1431	24.6659	24.4862	23.9121	24.8775	24.5804		-8.3568	-8.32714	-8.35645	-8.58681	-7.76704	-8.41029			0.029668	0.000357	-0.230008	0.589759	-0.053489			0.979646	0.999753	1.17284	0.664454	1.03777
hsa-miR-132-5p	29.7183	30.0105	30.1071	29.8362	30.2667	30.2078		-2.78159	-2.98258	-2.73556	-2.66271	-2.37782	-2.78294			-0.200992	0.0460208	0.118871	0.403762	-0.0013512			1.14949	0.968604	0.920908	0.755885	1.00094
hsa-miR-133b	29.9647	30.4567	30.3097	29.8255	30.6707	30.5243		-2.53513	-2.53631	-2.5329	-2.67344	-1.97381	-2.46637			-0.001175	0.002238	-0.138306	0.561324	0.068766			1.00081	0.99845	1.10061	0.67768	0.953453
hsa-miR-135a-5p	27.9388	28.3762	28.1564	28.0019	28.9917	28.5305		-4.56102	-4.61685	-4.68622	-4.49697	-3.65276	-4.46019			-0.055834	-0.125201	0.064049	0.908255	0.100829			1.03946	1.09066	0.956576	0.532829	0.932497
hsa-miR-135b-5p	28.5289	29.0645	28.9685	28.5574	29.5794	29.06		-3.97096	-3.92855	-3.87407	-3.94153	-3.0651	-3.93067			0.042403	0.096887	0.029428	0.90586	0.040288			0.971036	0.935048	0.979809	0.533714	0.972461
hsa-miR-140-3p	23.6316	24.04	23.8725	23.6067	24.5617	23.8846		-8.86827	-8.95307	-8.97012	-8.89223	-8.08275	-9.10608			-0.084807	-0.10185	-0.023964	0.785519	-0.237812			1.06055	1.07315	1.01675	0.580143	1.1792
hsa-miR-140-5p	24.9529	25.1915	25.4226	24.9024	25.5715	25.3341		-7.54692	-7.80154	-7.41999	-7.59649	-7.07296	-7.65658			-0.25462	0.126932	-0.049566	0.473963	-0.10966			1.19302	0.915777	1.03495	0.719984	1.07897
hsa-miR-141-3p	26.5358	27.0121	26.8357	26.538	27.6384	27.0195		-5.96404	-5.98096	-6.00687	-5.96085	-5.00612	-5.97122			-0.016922	-0.042831	0.003192	0.957925	-0.00718			1.0118	1.03013	0.99779	0.514797	1.00499
hsa-miR-142-5p	34.95	35.4232	35.2797	34.9797	36.3652	35.5223		2.45015	2.4301	2.43711	2.48083	3.72069	2.53159			-0.020046	-0.013042	0.030685	1.27054	0.081437			1.01399	1.00908	0.978955	0.414505	0.945116
hsa-miR-143-3p	30.6392	31.1401	30.7421	30.4031	32.2131	31.2587		-1.86068	-1.85293	-2.10047	-2.09577	-0.431351	-1.73204			0.007759	-0.23979	-0.235086	1.42933	0.128644			0.994636	1.18082	1.17698	0.371302	0.914691
hsa-miR-145-5p	29.0786	29.6335	29.4311	29.1054	29.7687	29.48		-3.42127	-3.35956	-3.41154	-3.39351	-2.87575	-3.51069			0.061712	0.009726	0.027765	0.54552	-0.089422			0.958126	0.993281	0.980939	0.685144	1.06394
hsa-miR-146a-5p	31.364	31.7706	31.7614	31.428	32.331	31.872		-1.13583	-1.22251	-1.08121	-1.07089	-0.313537	-1.11874			-0.086677	0.054622	0.064939	0.822292	0.017086			1.06192	0.962847	0.955986	0.565543	0.988227
hsa-miR-1471	36.1083	36.3665	36.283	36.0031	36.9948	36.3462		3.6084	3.3734	3.44039	3.50418	4.35028	3.3555			-0.235001	-0.168013	-0.104221	0.741876	-0.252904			1.17691	1.12351	1.07491	0.597961	1.1916
hsa-miR-148b-3p	23.9446	24.25	24.2658	24.0776	24.8055	24.3205		-8.55527	-8.74306	-8.57682	-8.42126	-7.83897	-8.67026			-0.187791	-0.021551	0.134013	0.716305	-0.114985			1.13902	1.01505	0.911293	0.608654	1.08296
hsa-miR-148b-5p	30.6263	31.2065	31.0098	30.6975	31.5475	30.8978		-1.87353	-1.78652	-1.83277	-1.80136	-1.09699	-2.09294			0.0870121	0.0407634	0.0721735	0.77654	-0.219405			0.941471	0.97214	0.951204	0.583765	1.16425
hsa-miR-150-5p	30.6847	31.1011	30.8261	30.6371	31.935	31.1349		-1.81513	-1.89198	-2.01652	-1.86178	-0.709474	-1.85581			-0.076844	-0.201385	-0.046648	1.10566	-0.040678			1.05471	1.1498	1.03286	0.46469	1.0286
hsa-miR-153-3p	26.5856	27.1724	26.8912	26.47	27.6516	26.9565		-5.91431	-5.82065	-5.95139	-6.02888	-4.99292	-6.03424			0.093661	-0.037073	-0.114568	0.921394	-0.11993			0.937142	1.02603	1.08265	0.527999	1.08668
hsa-miR-16-1-3p	26.377	26.6697	26.8087	26.2569	26.9753	26.9058		-6.12286	-6.32332	-6.03387	-6.24202	-5.6692	-6.08492			-0.200459	0.088984	-0.119166	0.453658	0.037936			1.14906	0.940185	1.08611	0.730189	0.974047
hsa-miR-17-3p	24.1719	24.5149	24.4277	24.1846	24.6236	24.6324		-8.32794	-8.47816	-8.41495	-8.31426	-8.02094	-8.35828			-0.150214	-0.0870099	0.0136778	0.306999	-0.0303349			1.10973	1.06217	0.990564	0.808322	1.02125
hsa-miR-17-5p	16.5929	17.0858	16.7678	16.5868	17.5831	17.0644		-15.907	-15.9073	-16.0748	-15.9121	-15.0614	-15.9263			-0.000318	-0.167863	-0.005107	0.845527	-0.019327			1.00022	1.12339	1.00355	0.556507	1.01349
hsa-miR-181a-3p	26.7295	27.1419	27.0559	26.4415	28.2004	27.0353		-5.77039	-5.85119	-5.78672	-6.05743	-4.44406	-5.95544			-0.080808	-0.016337	-0.287046	1.32632	-0.185049			1.05761	1.01139	1.22014	0.398783	1.13686
hsa-miR-181a-5p	22.4722	23.0498	22.6542	22.5291	23.3703	22.864		-10.0276	-9.94328	-10.1884	-9.96983	-9.27415	-10.1267			0.084358	-0.16077	0.057808	0.753487	-0.099102			0.943204	1.11788	0.960723	0.593168	1.07111
hsa-miR-181c-3p	29.3452	29.7067	29.8226	29.4423	30.2911	29.8573		-3.15464	-3.28636	-3.02	-3.05661	-2.35337	-3.13338			-0.131718	0.134643	0.0980333	0.801273	0.0212627			1.0956	0.910895	0.934306	0.573843	0.98537
hsa-miR-182-5p	21.5093	22.0073	21.724	21.5838	21.9994	21.8058		-10.9905	-10.9858	-11.1186	-10.9151	-10.6451	-11.1849			0.004734	-0.128077	0.075454	0.345406	-0.194373			0.996724	1.09284	0.949043	0.787086	1.14423
hsa-miR-183-5p	21.5093	22.0073	21.724	21.5838	21.9994	21.8058		-10.9905	-10.9858	-11.1186	-10.9151	-10.6451	-11.1849			0.004734	-0.128077	0.075454	0.345406	-0.194373			0.996724	1.09284	0.949043	0.787086	1.14423
hsa-miR-186-5p	22.3319	22.8899	22.4254	22.3014	23.1225	22.6505		-10.1679	-10.1032	-10.4172	-10.1974	-9.52196	-10.3402			0.064757	-0.249271	-0.029519	0.645963	-0.172239			0.956106	1.18861	1.02067	0.639066	1.12681
hsa-miR-187-3p	26.7136	27.247	26.9943	26.5677	27.8609	26.944		-5.78626	-5.74603	-5.84832	-5.93121	-4.78357	-6.04673			0.040235	-0.062054	-0.144949	1.00269	-0.260468			0.972497	1.04395	1.10569	0.499069	1.19787
hsa-miR-188-3p	32.3296	32.8502	32.6145	32.232	33.1075	32.8602		-0.17023	-0.142882	-0.228151	-0.266872	0.462982	-0.130507			0.0273483	-0.0579205	-0.0966421	0.633212	0.0397232			0.981222	1.04096	1.06928	0.644739	0.972842
hsa-miR-18a-5p	20.0148	20.6136	20.2695	20.0656	20.8703	20.4235		-12.4851	-12.3794	-12.5731	-12.4333	-11.7742	-12.5672			0.105623	-0.088022	0.051758	0.710894	-0.082187			0.929404	1.06291	0.96476	0.610941	1.05862
hsa-miR-18b-5p	19.3877	19.8815	19.7145	19.4	20.2048	19.8584		-13.1121	-13.1116	-13.1281	-13.0989	-12.4397	-13.1323			0.000568	-0.015993	0.013196	0.672423	-0.020128			0.999606	1.01115	0.990895	0.627452	1.01405
hsa-miR-190a-5p	27.2184	27.763	27.6531	27.2426	28.5099	27.5843		-5.2815	-5.23001	-5.18948	-5.25627	-4.13463	-5.4064			0.051483	0.092012	0.025223	1.14686	-0.124902			0.964944	0.938213	0.982669	0.451606	1.09043
hsa-miR-191-3p	29.5987	29.8479	30.0032	29.5584	30.4586	29.9459		-2.9012	-3.14517	-2.83942	-2.94045	-2.18588	-3.04482			-0.243974	0.0617751	-0.0392553	0.715315	-0.14362			1.18425	0.958085	1.02758	0.609072	1.10467
hsa-miR-193b-3p	22.2988	22.6808	22.4014	22.3548	23.0277	22.7643		-10.2011	-10.3123	-10.4412	-10.1441	-9.61684	-10.2264			-0.111182	-0.240141	0.056989	0.584234	-0.025356			1.08011	1.18111	0.961268	0.667003	1.01773
hsa-miR-194-5p	25.5295	26.0015	26.0026	25.2729	26.7348	25.7388		-6.97033	-6.99155	-6.84004	-7.226	-5.90969	-7.2519			-0.021217	0.130287	-0.255667	1.06064	-0.281566			1.01482	0.91365	1.19389	0.47942	1.21551
hsa-miR-195-5p	23.2389	23.7349	23.4433	23.036	24.3466	23.7528		-9.26099	-9.2582	-9.39935	-9.46293	-8.29785	-9.23788			0.002793	-0.138359	-0.20194	0.963141	0.023113			0.998066	1.10065	1.15024	0.512939	0.984107
hsa-miR-196a-5p	20.4662	20.7369	20.6498	20.5215	20.9974	20.7299		-12.0337	-12.2561	-12.1928	-11.9774	-11.6471	-12.2608			-0.222478	-0.159111	0.056253	0.386615	-0.227109			1.16674	1.1166	0.961759	0.764922	1.17049
hsa-miR-196b-3p	28.6824	28.9769	28.884	28.6134	29.3006	29.1611		-3.81743	-4.01611	-3.95865	-3.88547	-3.34387	-3.82965			-0.198684	-0.141217	-0.0680395	0.473556	-0.0122216			1.14765	1.10283	1.04829	0.720187	1.00851
hsa-miR-196b-5p	19.8468	20.4216	20.1922	19.9418	20.7969	20.3353		-12.6531	-12.5715	-12.6504	-12.5571	-11.8476	-12.6555			0.081656	0.002715	0.09602	0.80549	-0.002343			0.944972	0.99812	0.935611	0.572168	1.00163
hsa-miR-199b-5p	35.2523	35.5866	35.4533	35.0349	35.8349	35.5064		2.75243	2.59352	2.61067	2.53605	3.19044	2.51566			-0.158912	-0.141764	-0.21638	0.438013	-0.23677			1.11644	1.10325	1.16181	0.738151	1.17835
hsa-miR-19a-3p	15.1569	15.6196	15.4635	15.2985	15.6232	15.3867		-17.3429	-17.3734	-17.3792	-17.2004	-17.0213	-17.604			-0.03046	-0.036213	0.142592	0.321697	-0.261069			1.02134	1.02542	0.90589	0.800128	1.19837
hsa-miR-19b-1-5p	26.7869	27.164	26.988	26.778	27.6775	27.2474		-5.71297	-5.82906	-5.85457	-5.72084	-4.96695	-5.74332			-0.116085	-0.141594	-0.00786647	0.746023	-0.0303509			1.08379	1.10312	1.00547	0.596245	1.02126
hsa-miR-200a-3p	31.1012	31.5784	31.4455	31.1328	32.6013	31.39		-1.39865	-1.41463	-1.39711	-1.36611	-0.043207	-1.60067			-0.015975	0.001543	0.032548	1.35545	-0.202018			1.01113	0.998931	0.977692	0.390814	1.15031
hsa-miR-205-5p	28.4794	28.9337	28.6132	28.3522	29.2475	28.8097		-4.0205	-4.05941	-4.22941	-4.14667	-3.39697	-4.18096			-0.038903	-0.208913	-0.126168	0.623535	-0.16046			1.02733	1.15582	1.09139	0.649079	1.11764
hsa-miR-20a-3p	23.875	24.3104	24.18	23.6708	24.7609	24.2761		-8.62485	-8.68267	-8.66261	-8.82813	-7.8836	-8.71463			-0.0578205	-0.037766	-0.203282	0.74125	-0.089777			1.04089	1.02652	1.15131	0.598221	1.06421
hsa-miR-20a-5p	16.4136	16.8355	16.6334	16.2713	17.5406	17.0094		-16.0862	-16.1576	-16.2092	-16.2276	-15.1039	-15.9813			-0.071334	-0.122958	-0.141377	0.98234	0.1049			1.05069	1.08897	1.10296	0.506158	0.929869
hsa-miR-210-3p	24.3634	24.7145	24.5664	24.3322	24.9054	24.7764		-8.13644	-8.27851	-8.27625	-8.1667	-7.73907	-8.21434			-0.142062	-0.139811	-0.030256	0.397374	-0.077896			1.10348	1.10176	1.02119	0.759239	1.05548
hsa-miR-212-5p	29.7826	30.0735	30.226	29.9158	30.4452	30.1837		-2.71726	-2.91954	-2.61663	-2.58307	-2.19931	-2.80697			-0.202284	0.100628	0.134182	0.517946	-0.0897171			1.15052	0.932627	0.911186	0.698366	1.06416
hsa-miR-214-3p	33.6304	34.0635	33.8868	33.5503	34.8076	33.8691		1.13056	1.0704	1.04418	1.05141	2.16315	0.878347			-0.060166	-0.086381	-0.079157	1.03258	-0.252217			1.04259	1.0617	1.0564	0.488834	1.19104
hsa-miR-21-5p	19.1268	19.6085	19.5014	19.0234	20.3943	19.4351		-13.3731	-13.3846	-13.3412	-13.4754	-12.2502	-13.5556			-0.011529	0.031898	-0.102373	1.12289	-0.182506			1.00802	0.978133	1.07354	0.459173	1.13485
hsa-miR-216a-5p	35.2321	35.7132	35.4994	35.3743	36.2067	35.5838		2.73225	2.72012	2.6568	2.87544	3.56219	2.59308			-0.012127	-0.075455	0.143193	0.829942	-0.139175			1.00844	1.05369	0.905513	0.562552	1.10128
hsa-miR-216b-5p	33.258	33.7415	33.549	33.3205	34.3532	33.5093		0.758114	0.748474	0.706343	0.821597	1.70868	0.518564			-0.00964	-0.051771	0.063483	0.950569	-0.23955			1.0067	1.03654	0.956951	0.517428	1.18062
hsa-miR-219a-1-3p	34.6206	34.8946	34.8674	34.5027	35.6251	34.9834		2.12074	1.90155	2.02483	2.0038	2.98063	1.99266			-0.219188	-0.0959088	-0.116933	0.859889	-0.128078			1.16408	1.06874	1.08443	0.550995	1.09284
hsa-miR-219a-5p	24.9308	25.3681	25.2874	24.7936	25.6796	25.3957		-7.56905	-7.62493	-7.55522	-7.70525	-6.96488	-7.59498			-0.05588	0.013826	-0.136199	0.604174	-0.025932			1.03949	0.990462	1.09901	0.657848	1.01814
hsa-miR-22-3p	27.861	28.4077	28.0803	27.9352	28.3592	28.2468		-4.63891	-4.58538	-4.76233	-4.56367	-4.28528	-4.74386			0.053538	-0.123419	0.07524	0.353638	-0.104952			0.96357	1.08931	0.949184	0.782608	1.07546
hsa-miR-224-3p	27.4335	27.8672	27.8	27.2026	28.1596	27.6908		-5.06639	-5.12588	-5.04266	-5.29633	-4.48491	-5.29991			-0.0594871	0.0237365	-0.229939	0.581481	-0.233512			1.0421	0.983682	1.17279	0.668277	1.17569
hsa-miR-224-5p	28.9878	29.4625	29.4206	29.0721	29.9869	29.3951		-3.51208	-3.53054	-3.42204	-3.42676	-2.6576	-3.5956			-0.018457	0.090044	0.085326	0.854484	-0.083517			1.01288	0.939494	0.942572	0.553063	1.0596
hsa-miR-22-5p	30.5081	30.8453	30.8886	30.292	31.5521	31.0514		-1.99177	-2.1478	-1.95398	-2.20688	-1.09243	-1.93929			-0.15603	0.037788	-0.215117	0.899337	0.052473			1.11422	0.974147	1.1608	0.536133	0.964282
hsa-miR-23b-3p	19.8101	20.2127	20.1334	19.8101	20.634	20.3146		-12.6897	-12.7804	-12.7093	-12.6888	-12.0105	-12.6761			-0.090629	-0.019516	0.000966	0.679287	0.013636			1.06483	1.01362	0.999331	0.624474	0.990593
hsa-miR-23b-5p	31.6469	31.9499	31.7543	31.6182	32.7423	32.2368		-0.852918	-1.04311	-1.08833	-0.880657	0.0978355	-0.753909			-0.190192	-0.235415	-0.0277388	0.950753	0.0990089			1.14092	1.17725	1.01941	0.517362	0.933674
hsa-miR-24-1-5p	28.7383	29.2955	29.0641	28.5194	29.7257	29.2457		-3.7616	-3.69753	-3.77855	-3.97948	-2.91875	-3.74497			0.0640705	-0.0169537	-0.217881	0.842851	0.0166252			0.956561	1.01182	1.16302	0.557541	0.988542
hsa-miR-25-5p	30.8877	31.3224	31.0927	30.6066	31.9767	31.2947		-1.61218	-1.67061	-1.74992	-1.8923	-0.66783	-1.69596			-0.0584309	-0.137746	-0.280123	0.944349	-0.0837849			1.04133	1.10018	1.2143	0.519664	1.05979
hsa-miR-26a-5p	18.8706	19.2053	19.224	18.6752	19.6143	19.3247		-13.6292	-13.7877	-13.6186	-13.8237	-13.0302	-13.666			-0.158476	0.010626	-0.194407	0.599072	-0.036736			1.11611	0.992662	1.14425	0.660178	1.02579
hsa-miR-26b-3p	30.8336	31.3344	31.1397	30.9515	31.6038	31.2779		-1.66628	-1.65861	-1.70293	-1.5474	-1.0407	-1.71281			0.0076706	-0.0366505	0.118877	0.625579	-0.046534			0.994697	1.02573	0.920904	0.648159	1.03278
hsa-miR-27a-3p	18.2835	18.7103	18.4839	18.2412	18.9829	18.7306		-14.2163	-14.2828	-14.3587	-14.2577	-13.6616	-14.2601			-0.066452	-0.142351	-0.0414	0.554744	-0.043766			1.04714	1.1037	1.02911	0.680778	1.0308
hsa-miR-28-3p	24.8983	25.5298	25.2688	24.9871	25.8438	25.4763		-7.60153	-7.46322	-7.57385	-7.51184	-6.8007	-7.51443			0.138314	0.0276809	0.0896925	0.800828	0.0871036			0.90858	0.980996	0.939723	0.574019	0.941411
hsa-miR-299-5p	34.199	34.6591	34.3291	34.1914	36.4293	34.4534		1.69912	1.66601	1.48645	1.69252	3.78477	1.46267			-0.033108	-0.212669	-0.0066	2.08565	-0.236441			1.02321	1.15883	1.00459	0.235589	1.17808
hsa-miR-29b-3p	27.3684	27.873	27.6479	27.4712	28.3271	27.7371		-5.13148	-5.12009	-5.19471	-5.02769	-4.31741	-5.25363			0.01139	-0.063225	0.103791	0.814075	-0.122146			0.992136	1.0448	0.930584	0.568773	1.08835
hsa-miR-29c-3p	23.8666	24.2953	24.2017	23.6447	25.0941	24.3307		-8.63322	-8.69772	-8.64088	-8.85422	-7.55035	-8.65996			-0.064495	-0.007654	-0.220992	1.08287	-0.026736			1.04572	1.00532	1.16553	0.472088	1.0187
hsa-miR-301b	23.828	24.2807	24.0603	23.7088	24.5577	24.1783		-8.67184	-8.7124	-8.78232	-8.79007	-8.08676	-8.81241			-0.040552	-0.110472	-0.118226	0.585085	-0.140567			1.02851	1.07958	1.0854	0.66661	1.10234
hsa-miR-30b-5p	21.4987	21.8055	21.6545	21.3542	22.3379	21.9478		-11.0012	-11.1876	-11.1881	-11.1447	-10.3066	-11.0429			-0.186365	-0.18688	-0.143455	0.694589	-0.04169			1.13789	1.1383	1.10455	0.617885	1.02932
hsa-miR-30d-5p	20.3545	20.8169	20.5637	20.382	20.9635	20.896		-12.1454	-12.1761	-12.2789	-12.1169	-11.681	-12.0947			-0.030751	-0.133502	0.028514	0.464368	0.050675			1.02154	1.09695	0.98043	0.724789	0.965484
hsa-miR-30e-3p	21.9296	22.4955	22.3373	22.0323	23.1074	22.4069		-10.5703	-10.4976	-10.5053	-10.4666	-9.53707	-10.5838			0.072678	0.064916	0.103651	1.03318	-0.013511			0.950871	0.956001	0.930675	0.488631	1.00941
hsa-miR-31-3p	23.4074	23.7877	23.6519	23.2456	24.7464	24.0585		-9.09244	-9.20533	-9.19076	-9.25325	-7.89806	-8.93223			-0.112883	-0.098322	-0.160809	1.19438	0.16021			1.08139	1.07053	1.11791	0.436973	0.894895
hsa-miR-31-5p	22.6775	23.1664	22.8928	22.5741	23.2484	22.9913		-9.82239	-9.82663	-9.94983	-9.92482	-9.39611	-9.99938			-0.004241	-0.127442	-0.102437	0.426282	-0.176993			1.00294	1.09236	1.07359	0.744177	1.13053
hsa-miR-324-3p	23.7102	24.2944	24.0055	23.5354	24.3519	23.9609		-8.78964	-8.69863	-8.8371	-8.9635	-8.29256	-9.02981			0.091008	-0.047459	-0.173858	0.497085	-0.240166			0.938867	1.03344	1.12807	0.708537	1.18113
hsa-miR-324-5p	22.8425	23.4423	23.1423	22.9072	23.3048	23.2818		-9.65736	-9.55077	-9.70036	-9.59169	-9.33973	-9.70887			0.106589	-0.043007	0.065668	0.317629	-0.051514			0.928781	1.03026	0.955503	0.802387	1.03635
hsa-miR-32-5p	24.9256	25.4806	25.2291	24.7681	25.7676	25.4601		-7.5743	-7.51245	-7.61353	-7.73077	-6.87693	-7.53056			0.061844	-0.039236	-0.156472	0.697366	0.043734			0.958039	1.02757	1.11456	0.616697	0.970141
hsa-miR-326	28.6134	28.96	29.0358	28.699	30.1758	28.9804		-3.8865	-4.03306	-3.80684	-3.79984	-2.46868	-4.01032			-0.146562	0.079656	0.086661	1.41782	-0.123819			1.10693	0.946283	0.9417	0.374276	1.08962
hsa-miR-331-3p	23.599	24.0425	24	23.5674	24.6199	23.9622		-8.90089	-8.95054	-8.84258	-8.93149	-8.02463	-9.02852			-0.049645	0.058311	-0.030596	0.876259	-0.127625			1.03501	0.960388	1.02143	0.544778	1.09249
hsa-miR-338-3p	28.7419	29.2922	28.9331	28.8303	29.5079	29.2492		-3.75798	-3.70089	-3.90948	-3.66863	-3.13656	-3.74151			0.057088	-0.151503	0.089346	0.621423	0.01647			0.961202	1.11073	0.939949	0.650029	0.988649
hsa-miR-339-3p	24.9079	25.2546	25.1528	24.9166	25.4531	25.212		-7.59193	-7.73847	-7.68978	-7.58232	-7.19136	-7.77868			-0.146537	-0.0978493	0.00960866	0.400571	-0.186748			1.10691	1.07018	0.993362	0.757558	1.1382
hsa-miR-33a-5p	28.3827	28.8904	28.598	28.4987	29.502	28.8709		-4.1172	-4.10264	-4.24457	-4.00021	-3.14253	-4.11978			0.014557	-0.127375	0.116986	0.974662	-0.002586			0.989961	1.0923	0.922112	0.508859	1.00179
hsa-miR-340-3p	27.109	27.4832	27.3991	27.1226	27.8323	27.4013		-5.39085	-5.50986	-5.44349	-5.3763	-4.81222	-5.58945			-0.119003	-0.0526402	0.0145544	0.57863	-0.198599			1.08598	1.03716	0.989962	0.669599	1.14758
hsa-miR-340-5p	23.8056	24.3216	24.0979	23.8246	24.7617	24.3445		-8.69426	-8.67141	-8.74475	-8.67427	-7.88278	-8.64624			0.022852	-0.050486	0.019995	0.811485	0.048026			0.984285	1.03561	0.986236	0.569795	0.967259
hsa-miR-34a-3p	25.1194	25.5683	25.4848	24.9906	25.6393	25.4106		-7.38052	-7.42473	-7.35778	-7.50826	-7.0052	-7.58012			-0.0442108	0.0227351	-0.127747	0.375314	-0.199609			1.03112	0.984365	1.09259	0.770938	1.14839
hsa-miR-34a-5p	22.8346	23.3365	23.2808	22.8715	23.9395	23.2429		-9.66525	-9.65657	-9.56179	-9.62742	-8.705	-9.7478			0.008681	0.103464	0.037832	0.960257	-0.082546			0.994001	0.930795	0.974118	0.513965	1.05889
hsa-miR-34c-3p	26.9349	27.5149	27.2518	26.8303	27.5818	27.3405		-5.56499	-5.47812	-5.59083	-5.66859	-5.06267	-5.65022			0.08687	-0.025836	-0.103595	0.502325	-0.085226			0.941563	1.01807	1.07445	0.705968	1.06085
hsa-miR-34c-5p	26.2484	26.7779	26.3725	26.3021	27.3693	26.6889		-6.25145	-6.21515	-6.47007	-6.19679	-5.27518	-6.30182			0.036307	-0.218616	0.054664	0.97627	-0.050364			0.975148	1.16362	0.962819	0.508292	1.03553
hsa-miR-361-5p	21.1803	21.6586	21.4725	21.1383	22.0074	21.5291		-11.3195	-11.3344	-11.3701	-11.3606	-10.6371	-11.4616			-0.014871	-0.050529	-0.041065	0.682416	-0.142047			1.01036	1.03564	1.02887	0.623121	1.10347
hsa-miR-362-5p	28.0424	28.5261	28.3091	27.8694	28.9707	28.4013		-4.45745	-4.46698	-4.5335	-4.62954	-3.67381	-4.58938			-0.009525	-0.076049	-0.172083	0.783643	-0.131928			1.00662	1.05413	1.12668	0.580898	1.09576
hsa-miR-365a-3p	23.4612	23.7572	23.5999	23.3856	24.4744	23.8895		-9.03867	-9.23582	-9.24268	-9.11333	-8.17013	-9.10125			-0.19715	-0.204007	-0.074656	0.86854	-0.062576			1.14643	1.15189	1.05311	0.547701	1.04433
hsa-miR-373-3p	34.2776	34.7206	34.5547	34.2776	35.7812	34.7547		1.77777	1.72754	1.71209	1.77875	3.1367	1.76399			-0.050224	-0.065678	0.000979	1.35893	-0.013778			1.03543	1.04658	0.999322	0.389872	1.0096
hsa-miR-373-5p	31.6749	32.1348	31.9419	31.7046	32.9009	32.182		-0.825006	-0.858273	-0.900704	-0.79434	0.256451	-0.808737			-0.033267	-0.075698	0.030666	1.08146	0.016269			1.02333	1.05387	0.978968	0.472551	0.988787
hsa-miR-374a-5p	20.8798	21.4146	21.1559	20.8754	21.7088	21.4618		-11.6201	-11.5784	-11.6867	-11.6235	-10.9357	-11.5289			0.04164	-0.066605	-0.003388	0.684382	0.091141			0.97155	1.04725	1.00235	0.622272	0.93878
hsa-miR-374b-3p	27.7317	28.1414	28.0025	27.7308	28.7087	28.2018		-4.76813	-4.85165	-4.84009	-4.76808	-3.93578	-4.78891			-0.083517	-0.071965	4.6e-05	0.832347	-0.020777			1.0596	1.05115	0.999968	0.561615	1.01451
hsa-miR-378a-5p	28.9793	29.2787	29.3424	29.0019	29.8296	29.3089		-3.52052	-3.71438	-3.50023	-3.49695	-2.81491	-3.68178			-0.19386	0.0202899	0.0235735	0.705608	-0.16126			1.14382	0.986035	0.983793	0.613184	1.11826
hsa-miR-421	24.5424	25.0505	25.0155	24.4389	25.3161	25.1416		-7.95748	-7.94253	-7.82707	-8.06001	-7.32844	-7.84914			0.014944	0.130403	-0.102531	0.629033	0.108338			0.989695	0.913576	1.07366	0.64661	0.927656
hsa-miR-424-5p	24.1125	24.6462	24.4547	24.2304	24.9436	24.3587		-8.38735	-8.3469	-8.38792	-8.26852	-7.70086	-8.63205			0.040447	-0.000573	0.118827	0.686487	-0.2447			0.972354	1.0004	0.920936	0.621365	1.18485
hsa-miR-425-3p	26.5771	27.0469	26.8521	26.5318	27.4132	27.1031		-5.92275	-5.94614	-5.99048	-5.96714	-5.23134	-5.88757			-0.023384	-0.06773	-0.044381	0.691413	0.035186			1.01634	1.04807	1.03124	0.619247	0.975906
hsa-miR-429	29.7379	30.1362	30.0267	29.7337	30.5306	30.0603		-2.76193	-2.85684	-2.81589	-2.76524	-2.11385	-2.93038			-0.094908	-0.053963	-0.003309	0.648079	-0.168449			1.068	1.03811	1.0023	0.638129	1.12385
hsa-miR-450a-5p	25.2046	25.6346	25.5964	25.2525	26.52	25.51		-7.2953	-7.35845	-7.2462	-7.2464	-6.12446	-7.4807			-0.063151	0.049106	0.048906	1.17085	-0.185399			1.04475	0.966535	0.966669	0.44416	1.13713
hsa-miR-451a	31.2474	31.7153	31.4134	31.2623	32.3464	31.732		-1.25246	-1.27771	-1.42923	-1.23657	-0.2981	-1.25874			-0.025244	-0.176762	0.015895	0.954365	-0.006275			1.01765	1.13034	0.989043	0.516069	1.00436
hsa-miR-452-5p	24.4796	24.9886	24.7472	24.2733	25.8539	25.0876		-8.02027	-8.00442	-8.09541	-8.22558	-6.79056	-7.90314			0.015847	-0.075138	-0.205306	1.22971	0.117125			0.989076	1.05346	1.15293	0.426403	0.922023
hsa-miR-454-3p	21.6602	22.1873	21.8358	21.5237	22.3436	21.9644		-10.8397	-10.8057	-11.0068	-10.9752	-10.3009	-11.0263			0.03394	-0.167153	-0.135485	0.538799	-0.186636			0.976749	1.12284	1.09846	0.688344	1.13811
hsa-miR-455-3p	24.8003	25.1544	25.1929	24.704	25.6621	25.1905		-7.69955	-7.83866	-7.64973	-7.79491	-6.98235	-7.80017			-0.13911	0.0498157	-0.0953642	0.717197	-0.100628			1.10123	0.96606	1.06834	0.608278	1.07224
hsa-miR-455-5p	28.1448	28.6619	28.4996	27.9966	28.6919	28.6607		-4.35503	-4.3312	-4.34304	-4.50232	-3.95256	-4.33004			0.023832	0.011986	-0.147294	0.402468	0.024993			0.983617	0.991726	1.10749	0.756563	0.982825
hsa-miR-483-3p	31.4382	31.9635	31.7098	31.4324	32.9355	31.9146		-1.06172	-1.02956	-1.13278	-1.06647	0.291023	-1.07607			0.032161	-0.071061	-0.004754	1.35274	-0.014354			0.977954	1.05049	1.0033	0.391548	1.01
hsa-miR-485-3p	30.668	31.1407	31.0585	30.7293	31.7393	31.1607		-1.8319	-1.85235	-1.78412	-1.76955	-0.905155	-1.83004			-0.020449	0.047777	0.062349	0.926746	0.001861			1.01428	0.967426	0.957704	0.526043	0.998711
hsa-miR-489-3p	29.9892	30.4773	30.1958	29.912	30.7738	30.4442		-2.51067	-2.51577	-2.64684	-2.58689	-1.87074	-2.54656			-0.00509376	-0.136164	-0.0762125	0.639928	-0.0358822			1.00354	1.09898	1.05425	0.641745	1.02518
hsa-miR-491-3p	28.18	28.6319	28.3875	28.2602	29.2929	28.7036		-4.31988	-4.36117	-4.45514	-4.23869	-3.35156	-4.28713			-0.041289	-0.135253	0.081195	0.968322	0.032751			1.02903	1.09829	0.945274	0.5111	0.977554
hsa-miR-497-5p	30.9429	31.3419	31.2989	31.0701	31.6369	31.3131		-1.55701	-1.65116	-1.54368	-1.42879	-1.00757	-1.67758			-0.09415	0.013328	0.128219	0.549435	-0.120575			1.06744	0.990804	0.91496	0.683288	1.08717
hsa-miR-500a-5p	24.1072	24.595	24.2032	24.0773	25.0587	24.5748		-8.39267	-8.39808	-8.63937	-8.42156	-7.58577	-8.41594			-0.005412	-0.246708	-0.028889	0.806892	-0.023277			1.00376	1.1865	1.02023	0.571612	1.01627
hsa-miR-501-3p	27.3055	27.7557	27.6729	27.2734	28.7138	27.6422		-5.19432	-5.23732	-5.16974	-5.22552	-3.93066	-5.34855			-0.042997	0.0245872	-0.0311926	1.26366	-0.154229			1.03025	0.983102	1.02186	0.416486	1.11283
hsa-miR-501-5p	25.022	25.4547	25.271	25.0692	25.7461	25.5048		-7.47783	-7.53831	-7.57163	-7.42966	-6.89842	-7.48593			-0.060479	-0.093797	0.048166	0.579407	-0.008102			1.04281	1.06718	0.967165	0.669239	1.00563
hsa-miR-502-5p	25.905	26.4651	26.1369	25.9913	27.122	26.2923		-6.59486	-6.52799	-6.7057	-6.50764	-5.52246	-6.69837			0.066872	-0.110837	0.087225	1.07241	-0.10351			0.954706	1.07985	0.941332	0.475525	1.07438
hsa-miR-503-5p	28.013	28.5045	28.3696	28.0014	28.9523	28.3662		-4.48683	-4.48852	-4.47297	-4.49749	-3.69221	-4.62448			-0.001692	0.013857	-0.010656	0.794622	-0.137648			1.00117	0.990441	1.00741	0.576494	1.10011
hsa-miR-504-5p	36.0341	36.4341	36.2341	35.8737	37.2232	36.3911		3.53425	3.44106	3.3915	3.37481	4.57868	3.4004			-0.09319	-0.142751	-0.159441	1.04443	-0.133849			1.06673	1.10401	1.11685	0.484837	1.09722
hsa-miR-509-3p	33.4933	33.9659	33.7039	33.4494	34.4223	34.0016		0.993397	0.97286	0.861333	0.950517	1.7778	1.0109			-0.020537	-0.132064	-0.04288	0.784406	0.0175			1.01434	1.09586	1.03017	0.580591	0.987943
hsa-miR-518c-5p	33.9643	34.5546	34.2342	33.9667	35.0602	34.3136		1.46444	1.56155	1.39159	1.46783	2.41569	1.3229			0.097118	-0.07285	0.003394	0.951257	-0.141536			0.934899	1.05179	0.99765	0.517182	1.10308
hsa-miR-518e-5p	33.5792	33.8792	33.8792	33.4792	34.9942	33.8792		1.07932	0.886133	1.03657	0.980299	2.34971	0.888479			-0.19319	-0.042751	-0.099024	1.27039	-0.190844			1.14329	1.03008	1.07105	0.414549	1.14143
hsa-miR-520c-3p	32.0016	32.4307	32.2093	32.0339	33.1734	32.4335		-0.498219	-0.562352	-0.633287	-0.465028	0.528873	-0.557246			-0.064133	-0.135068	0.033191	1.02709	-0.059027			1.04546	1.09814	0.977256	0.490698	1.04176
hsa-miR-532-3p	24.7411	25.145	25.1518	24.615	25.47	25.0944		-7.7588	-7.84806	-7.69084	-7.88384	-7.17453	-7.89629			-0.0892574	0.0679622	-0.125043	0.58427	-0.13749			1.06382	0.953985	1.09054	0.666987	1.09999
hsa-miR-542-5p	28.5546	29.0779	28.8148	28.605	29.1389	29.053		-3.94531	-3.91511	-4.02786	-3.89394	-3.50559	-3.93774			0.030208	-0.082542	0.051379	0.439723	0.007575			0.979279	1.05888	0.965013	0.737276	0.994763
hsa-miR-545-3p	29.6173	30.1404	29.9538	29.6581	30.4873	29.9578		-2.88252	-2.85261	-2.88879	-2.84083	-2.15716	-3.0329			0.029908	-0.00627	0.041693	0.725356	-0.150376			0.979483	1.00436	0.971514	0.604848	1.10986
hsa-miR-548a-3p	28.8303	29.284	29.2404	28.7804	29.8201	29.2113		-3.66955	-3.70903	-3.60218	-3.71846	-2.82444	-3.7794			-0.0394882	0.0673633	-0.0489099	0.845106	-0.109859			1.02775	0.954381	1.03448	0.55667	1.07912
hsa-miR-548k	29.2985	29.7499	29.5767	29.3116	30.2041	29.7378		-3.20135	-3.24312	-3.26597	-3.18732	-2.44039	-3.25288			-0.0417671	-0.0646119	0.0140333	0.760967	-0.0515278			1.02937	1.0458	0.99032	0.590101	1.03636
hsa-miR-550a-3p	27.8589	28.2454	28.046	27.6395	28.7722	28.2296		-4.64101	-4.74761	-4.79657	-4.85938	-3.87227	-4.76113			-0.106601	-0.15556	-0.218367	0.768735	-0.120127			1.07669	1.11385	1.16342	0.586932	1.08683
hsa-miR-550a-5p	28.5503	28.9355	28.7607	28.3469	29.7027	28.8358		-3.94955	-4.05759	-4.0819	-4.15195	-2.94176	-4.15491			-0.108045	-0.132352	-0.2024	1.00779	-0.205359			1.07777	1.09608	1.15061	0.497308	1.15297
hsa-miR-556-3p	28.4415	28.8114	28.8365	28.3114	29.2455	28.7377		-4.05842	-4.18169	-4.00611	-4.18745	-3.399	-4.25297			-0.123276	0.0523097	-0.129037	0.659411	-0.194552			1.08921	0.964391	1.09356	0.633137	1.14437
hsa-miR-556-5p	33.6375	33.9849	33.8777	33.4863	34.4576	34.0919		1.13763	0.991811	1.03504	0.987411	1.81306	1.10119			-0.145824	-0.102597	-0.150223	0.67543	-0.0364449			1.10636	1.0737	1.10974	0.626146	1.02558
hsa-miR-561-3p	34.0877	34.3548	34.3274	33.9989	34.967	34.5449		1.58788	1.36172	1.4848	1.49998	2.32252	1.55424			-0.226157	-0.103078	-0.0879039	0.734638	-0.0336403			1.16972	1.07406	1.06282	0.600969	1.02359
hsa-miR-572	29.2046	29.7802	29.4031	29.1763	30.4553	29.7043		-3.29527	-3.21285	-3.43955	-3.32262	-2.18917	-3.28643			0.082424	-0.144279	-0.027353	1.1061	0.008838			0.944469	1.10518	1.01914	0.464549	0.993893
hsa-miR-574-3p	25.3463	25.7449	25.5926	25.25	26.4773	25.6026		-7.15356	-7.24813	-7.24999	-7.24894	-6.16719	-7.3881			-0.094572	-0.096426	-0.095377	0.986369	-0.234535			1.06775	1.06912	1.06834	0.504747	1.17653
hsa-miR-576-3p	29.019	29.4995	29.3989	29.0244	29.6897	29.54		-3.48088	-3.4936	-3.44371	-3.47449	-2.95477	-3.45076			-0.01272	0.037168	0.006389	0.526111	0.030121			1.00886	0.974566	0.995581	0.694424	0.979338
hsa-miR-576-5p	26.7336	27.3026	27.0038	26.8158	27.5757	27.2153		-5.76626	-5.69043	-5.83887	-5.68304	-5.06881	-5.77539			0.075828	-0.072607	0.083218	0.697447	-0.009129			0.948797	1.05162	0.94395	0.616662	1.00635
hsa-miR-580-3p	30.4397	30.7133	30.893	30.533	31.515	31.008		-2.0602	-2.2798	-1.94964	-1.96588	-1.12946	-1.98267			-0.219602	0.110561	0.0943159	0.930738	0.0775332			1.16441	0.926228	0.936716	0.52459	0.947677
hsa-miR-582-5p	24.483	25.0414	24.8068	24.4244	25.3752	24.9249		-8.01684	-7.95167	-8.03577	-8.07447	-7.26926	-8.06579			0.065178	-0.018929	-0.057626	0.74758	-0.048946			0.955827	1.01321	1.04075	0.595602	1.03451
hsa-miR-589-3p	26.997	27.4657	27.3048	27.0098	28.2173	27.3222		-5.50287	-5.52737	-5.53786	-5.48912	-4.42719	-5.66851			-0.024503	-0.0349908	0.0137542	1.07568	-0.165643			1.01713	1.02455	0.990512	0.474447	1.12167
hsa-miR-589-5p	26.0272	26.5349	26.475	26.0016	27.003	26.5699		-6.47264	-6.45819	-6.36762	-6.49732	-5.64153	-6.42079			0.014458	0.105024	-0.024676	0.831113	0.051851			0.990029	0.929789	1.01725	0.562095	0.964698
hsa-miR-592	32.5126	32.7502	32.8319	32.2888	33.8613	33.0658		0.0127187	-0.242823	-0.0107208	-0.210087	1.21682	0.0751363			-0.255542	-0.0234395	-0.222806	1.2041	0.0624176			1.19378	1.01638	1.167	0.434039	0.957658
hsa-miR-624-5p	30.9859	31.2881	31.3676	31.0062	32.335	31.511		-1.51399	-1.70493	-1.47497	-1.49273	-0.309471	-1.47975			-0.190933	0.0390201	0.0212631	1.20452	0.0342453			1.1415	0.973316	0.98537	0.433913	0.976542
hsa-miR-628-5p	27.1275	27.5789	27.5102	27.1717	27.993	27.736		-5.37238	-5.41411	-5.33243	-5.32716	-4.65154	-5.25471			-0.041732	0.0399413	0.045215	0.720836	0.117669			1.02935	0.972694	0.969145	0.606746	0.921676
hsa-miR-629-5p	27.1981	27.6512	27.5666	27.0892	27.8453	27.6291		-5.30178	-5.34187	-5.27598	-5.40974	-4.79918	-5.36158			-0.040082	0.025801	-0.107954	0.502601	-0.059792			1.02817	0.982275	1.0777	0.705833	1.04232
hsa-miR-636	31.2762	31.6288	31.494	31.2235	32.4498	31.6897		-1.22368	-1.36428	-1.34858	-1.27535	-0.194691	-1.30104			-0.140596	-0.1249	-0.0516649	1.02899	-0.0773621			1.10236	1.09043	1.03646	0.490053	1.05509
hsa-miR-651-5p	29.0159	29.5194	29.4155	29.0319	29.937	29.4822		-3.48392	-3.47365	-3.4271	-3.46701	-2.70748	-3.50853			0.010274	0.056825	0.016914	0.776442	-0.024608			0.992904	0.961378	0.988345	0.583805	1.0172
hsa-miR-659-3p	33.4763	33.8852	33.916	33.4774	34.9069	33.8223		0.976422	0.892179	1.07339	0.978509	2.26236	0.83161			-0.084243	0.0969653	0.00208684	1.28594	-0.144812			1.06013	0.934998	0.998555	0.410103	1.10559
hsa-miR-671-5p	28.1588	28.5815	28.4699	28.0541	29.313	28.5905		-4.34111	-4.41157	-4.37275	-4.44479	-3.3315	-4.4002			-0.070466	-0.031641	-0.103682	1.00961	-0.059092			1.05006	1.02217	1.07451	0.496682	1.04181
hsa-miR-7-1-3p	24.2937	24.8763	24.4422	24.1232	24.9155	24.8688		-8.20619	-8.11678	-8.40038	-8.37574	-7.72897	-8.12195			0.0894096	-0.194186	-0.169547	0.477222	0.0842426			0.939907	1.14408	1.12471	0.71836	0.94328
hsa-miR-744-5p	26.6374	27.1142	26.8023	26.7493	27.5316	27.2667		-5.86249	-5.8789	-6.04031	-5.74955	-5.1129	-5.72406			-0.016409	-0.177823	0.112939	0.749585	0.13843			1.01144	1.13118	0.924702	0.594775	0.908507
hsa-miR-758-3p	35.8447	36.3119	35.9468	35.6848	36.6199	35.9734		3.34483	3.31883	3.10418	3.18595	3.97536	2.98267			-0.0260002	-0.240654	-0.158886	0.630523	-0.362161			1.01819	1.18153	1.11642	0.645942	1.28535
hsa-miR-7-5p	23.5277	24.0783	23.7475	23.5436	24.2679	23.6695		-8.97213	-8.91479	-9.09513	-8.95534	-8.37657	-9.32124			0.05734	-0.123004	0.016787	0.595559	-0.349118			0.961034	1.089	0.988432	0.661788	1.27378
hsa-miR-767-5p	31.5447	31.9296	31.6804	31.4973	32.7642	31.908		-0.955154	-1.0635	-1.16226	-1.00157	0.119732	-1.08272			-0.108346	-0.207104	-0.0464113	1.07489	-0.127562			1.07799	1.15437	1.03269	0.474709	1.09245
hsa-miR-874-3p	25.8746	26.3847	26.0714	25.9319	26.7877	26.4535		-6.62524	-6.60836	-6.77121	-6.56696	-5.8568	-6.53723			0.01688	-0.145971	0.058275	0.768432	0.088008			0.988368	1.10648	0.960412	0.587055	0.940821
hsa-miR-877-3p	31.7751	32.0647	31.9351	31.7568	32.3723	32.1523		-0.724769	-0.928355	-0.907487	-0.742112	-0.272236	-0.838431			-0.203586	-0.182718	-0.0173433	0.452533	-0.113662			1.15156	1.13502	1.01209	0.730759	1.08197
hsa-miR-885-5p	35.8759	36.3759	35.9759	35.7496	36.5496	36.2353		3.37605	3.38286	3.1333	3.25067	3.90506	3.24455			0.00681	-0.242751	-0.125383	0.52901	-0.131505			0.995291	1.18325	1.0908	0.69303	1.09544
hsa-miR-887-3p	35.3547	35.8506	35.5262	35.3295	36.3071	35.8542		2.85483	2.85754	2.6836	2.83062	3.66264	2.86351			0.002716	-0.171225	-0.024204	0.807815	0.008682			0.998119	1.12601	1.01692	0.571246	0.994
hsa-miR-9-3p	27.2291	27.7976	27.4121	27.2901	28.6282	27.7477		-5.27081	-5.19545	-5.43053	-5.20882	-4.01633	-5.24297			0.075364	-0.15972	0.06199	1.25448	0.027841			0.949103	1.11707	0.957942	0.419146	0.980887
hsa-miR-941	26.8028	27.3405	27.2075	26.8804	27.5378	27.1173		-5.6971	-5.65254	-5.63515	-5.61852	-5.10668	-5.87342			0.0445564	0.0619437	0.0785748	0.590421	-0.176324			0.969588	0.957973	0.946993	0.664149	1.13
hsa-miR-9-5p	22.5068	23.0509	22.702	22.5785	23.3637	22.9712		-9.99311	-9.94219	-10.1406	-9.92042	-9.28084	-10.0195			0.050924	-0.147532	0.072694	0.71227	-0.026367			0.965318	1.10767	0.950861	0.610359	1.01844
hsa-miR-96-3p	30.5648	30.9938	31.004	30.424	32.331	31.1402		-1.93509	-1.99924	-1.83864	-2.07485	-0.313477	-1.85049			-0.064149	0.096453	-0.139762	1.62161	0.084603			1.04547	0.93533	1.10172	0.324971	0.943044
hsa-miR-96-5p	27.5056	28.0305	27.8937	27.4922	28.2206	27.879		-4.9943	-4.96259	-4.94893	-5.00671	-4.42391	-5.11173			0.031709	0.045376	-0.012411	0.570391	-0.117423			0.978261	0.969037	1.00864	0.673434	1.0848
hsa-miR-99a-3p	28.0849	28.5539	28.3168	28.0649	28.6743	28.4124		-4.41494	-4.43916	-4.52583	-4.43403	-3.97018	-4.57834			-0.024218	-0.110894	-0.019088	0.44476	-0.163401			1.01693	1.0799	1.01332	0.734707	1.11992
hsa-miR-99a-5p	20.4368	20.825	20.6784	20.4725	21.1547	20.7731		-12.0631	-12.168	-12.1642	-12.0264	-11.4898	-12.2176			-0.104946	-0.101106	0.036684	0.573249	-0.154562			1.07545	1.0726	0.974893	0.672101	1.11308
hsa-miR-99b-3p	25.1091	25.6619	25.5575	25.1083	25.6812	25.5436		-7.39073	-7.33119	-7.28515	-7.39057	-6.96332	-7.44716			0.0595337	0.10558	0.00015851	0.427403	-0.0564293			0.959574	0.929431	0.99989	0.743599	1.03989
U6 snRNA	32.4999	32.9931	32.8426	32.4989	32.6445	32.9907

## Sheet: Set 2
down-regulated miRNAs	Set 2
	Ct							delta Ct							delta delta Ct							fold
	un	un+P5 si	E27	E27+P5 si	E78	E78+P5 si		un	un+P5 si	E27	E27+P5 si	E78	E78+P5 si			un+P5 si	E27	E27+P5 si	E78	E78+P5 si			un+P5 si	E27	E27+P5 si	E78	E78+P5 si
hsa-let-7b-5p	22.5263	22.2897	22.606	22.9011	23.6498	22.8922		-10.1445	-10.2097	-10.0652	-10.0908	-9.16902	-10.0245			-0.0651995	0.0792655	0.0536955	0.975478	0.120042			1.04623	0.946539	0.963465	0.508571	0.920161
hsa-let-7c-5p	23.2566	23.1716	23.3834	23.7324	24.688	23.5953		-9.41416	-9.32775	-9.28786	-9.25945	-8.13076	-9.32135			0.0864125	0.126304	0.154713	1.2834	0.0928185			0.941862	0.916176	0.898311	0.410826	0.937689
hsa-let-7e-3p	29.0651	28.9583	29.0234	29.4053	30.372	29.3316		-3.60566	-3.54111	-3.64789	-3.58657	-2.44674	-3.58509			0.0645523	-0.0422228	0.0190983	1.15892	0.0205789			0.956242	1.0297	0.986849	0.447846	0.985837
hsa-let-7g-5p	21.6626	21.5436	21.6569	22.0505	22.7404	21.9673		-11.0082	-10.9557	-11.0144	-10.9413	-10.0783	-10.9493			0.0524455	-0.0061855	0.066839	0.929838	0.058861			0.9643	1.0043	0.954728	0.524917	0.960022
hsa-let-7i-5p	26.9667	26.7439	26.9181	27.2258	27.7835	27.2279		-5.70402	-5.75551	-5.75312	-5.76606	-5.03527	-5.68877			-0.0514915	-0.0491	-0.0620425	0.668748	0.015248			1.03634	1.03462	1.04394	0.629053	0.989487
hsa-miR-101-3p	21.1126	20.9138	21.14	21.3651	22.0807	21.3359		-11.5581	-11.5856	-11.5313	-11.6268	-10.7381	-11.5808			-0.027481	0.0268845	-0.0686825	0.820053	-0.02264			1.01923	0.981538	1.04876	0.566421	1.01582
hsa-miR-103a-3p	19.8538	19.6431	19.8336	20.0267	20.7303	20.0198		-12.817	-12.8563	-12.8376	-12.9652	-12.0884	-12.8968			-0.039329	-0.020682	-0.14826	0.728533	-0.079875			1.02764	1.01444	1.10823	0.603517	1.05693
hsa-miR-106b-3p	25.1924	24.9966	25.1819	25.3716	26.0371	25.3871		-7.47835	-7.50275	-7.48938	-7.62023	-6.78169	-7.52961			-0.0243986	-0.0110261	-0.141881	0.696664	-0.0512546			1.01706	1.00767	1.10334	0.616997	1.03617
hsa-miR-106b-5p	19.8696	19.6948	19.8944	20.2584	20.9206	20.166		-12.8012	-12.8046	-12.7768	-12.7335	-11.8981	-12.7506			-0.003405	0.0243915	0.067737	0.903052	0.05057			1.00236	0.983235	0.954133	0.534754	0.965555
hsa-miR-10a-3p	35.7591	35.6104	35.8004	35.9847	37.1493	35.9622		3.08835	3.11103	3.12921	2.99283	4.33054	3.04553			0.0226805	0.0408553	-0.0955184	1.24219	-0.0428239			0.984402	0.972078	1.06845	0.422731	1.03013
hsa-miR-10a-5p	31.4462	31.3281	31.4939	31.99	32.8272	31.8064		-1.22455	-1.17128	-1.17731	-1.00185	0.008405	-1.11024			0.053265	0.0472425	0.222696	1.23295	0.114305			0.963753	0.967784	0.856962	0.425445	0.923828
hsa-miR-10b-5p	21.7088	21.4924	21.7479	22.0287	22.7946	21.9556		-10.962	-11.007	-10.9233	-10.9632	-10.0242	-10.961			-0.044974	0.038655	-0.001232	0.937823	0.00097			1.03166	0.973562	1.00085	0.52202	0.999328
hsa-miR-1179	33.8421	33.7553	33.8963	34.1218	34.8515	34.0636		1.17138	1.2559	1.2251	1.12994	2.03271	1.1469			0.0845187	0.0537154	-0.0414435	0.861327	-0.0244855			0.943099	0.963452	1.02914	0.550446	1.01712
hsa-miR-122-5p	32.5097	32.3846	32.6209	32.8835	33.5612	32.7835		-0.161039	-0.114815	-0.050313	-0.108417	0.742456	-0.133197			0.046224	0.110726	0.0526215	0.903494	0.027841			0.968468	0.926122	0.964183	0.53459	0.980887
hsa-miR-1243	34.1543	34.054	34.2172	34.5219	35.1399	34.4069		1.48355	1.55465	1.54592	1.52998	2.32116	1.49024			0.0711081	0.0623784	0.0464313	0.83761	0.00669948			0.951907	0.957684	0.968329	0.55957	0.995367
hsa-miR-1249	33.6741	33.5418	33.684	34.0556	35.354	33.9754		1.00339	1.04246	1.01275	1.06376	2.53519	1.05875			0.039078	0.00936307	0.0603742	1.53181	0.055363			0.973277	0.993531	0.959015	0.345844	0.962352
hsa-miR-125a-3p	28.8033	28.5897	28.795	28.9548	29.5719	28.9876		-3.86746	-3.90969	-3.87627	-4.0371	-3.24687	-3.92904			-0.0422305	-0.00880919	-0.169638	0.62059	-0.0615827			1.0297	1.00612	1.12478	0.650405	1.04361
hsa-miR-125b-5p	21.966	21.7992	21.9631	22.1259	23.0234	22.0908		-10.7047	-10.7002	-10.7081	-10.866	-9.79543	-10.8259			0.0045455	-0.003412	-0.161229	0.909302	-0.121166			0.996854	1.00237	1.11824	0.532443	1.08761
hsa-miR-126-3p	21.3948	21.197	21.3795	21.7626	22.3576	21.6819		-11.2759	-11.3024	-11.2918	-11.2293	-10.4611	-11.2348			-0.0264725	-0.0158295	0.046603	0.814805	0.0411435			1.01852	1.01103	0.968213	0.568486	0.971884
hsa-miR-1269a	29.4216	29.2237	29.4833	29.7131	30.5034	29.759		-3.24913	-3.27571	-3.18794	-3.27879	-2.31535	-3.15771			-0.0265739	0.0611899	-0.0296561	0.93378	0.091418			1.01859	0.958473	1.02077	0.523485	0.9386
hsa-miR-1271-5p	28.669	28.5075	28.7647	28.9837	29.6599	28.9493		-4.00178	-3.99191	-3.9065	-4.00822	-3.15885	-3.96737			0.00986408	0.0952743	-0.0064425	0.84293	0.0344077			0.993186	0.936094	1.00448	0.55751	0.976433
hsa-miR-1296-5p	26.4791	26.3473	26.4623	26.7886	27.3761	26.6543		-6.19169	-6.15206	-6.20896	-6.20324	-5.44267	-6.26239			0.0396319	-0.017269	-0.0115464	0.749017	-0.0707002			0.972903	1.01204	1.00804	0.595009	1.05023
hsa-miR-132-3p	24.1991	24.0276	24.3146	24.6232	25.2717	24.5333		-8.47163	-8.47181	-8.35662	-8.36871	-7.54709	-8.38337			-0.0001785	0.115004	0.102915	0.924539	0.0882595			1.00012	0.92338	0.93115	0.526849	0.940657
hsa-miR-132-5p	29.9716	29.7772	29.9127	30.1091	30.6386	30.1574		-2.69914	-2.72215	-2.75857	-2.88276	-2.1802	-2.75925			-0.0230104	-0.0594356	-0.183617	0.518939	-0.0601112			1.01608	1.04206	1.13573	0.697885	1.04255
hsa-miR-133b	30.0676	29.8951	30.1372	30.4905	31.0637	30.417		-2.60317	-2.60429	-2.53401	-2.50134	-1.75506	-2.49963			-0.001119	0.069153	0.10183	0.848109	0.103536			1.00078	0.953197	0.931851	0.555513	0.930749
hsa-miR-135a-5p	28.0792	27.9704	28.0476	28.4534	29.184	28.3435		-4.5916	-4.52899	-4.62362	-4.53852	-3.63481	-4.57321			0.0626005	-0.0320245	0.0530735	0.956787	0.01839			0.957537	1.02245	0.963881	0.515203	0.987334
hsa-miR-135b-5p	28.763	28.5431	28.7487	29.0623	29.822	29.0143		-3.9078	-3.95624	-3.92251	-3.92961	-2.99682	-3.90237			-0.0484435	-0.014714	-0.021812	0.910974	0.00543			1.03415	1.01025	1.01523	0.531826	0.996243
hsa-miR-140-3p	23.7396	23.6191	23.7521	23.9623	24.8009	23.8786		-8.93117	-8.88025	-8.91919	-9.02958	-8.01791	-9.0381			0.050925	0.011982	-0.0984025	0.913263	-0.106924			0.965317	0.991729	1.07059	0.530983	1.07693
hsa-miR-140-5p	25.1625	24.9277	25.1878	25.2628	25.8815	25.3784		-7.50824	-7.5717	-7.48345	-7.72906	-6.93725	-7.53828			-0.063466	0.024783	-0.220823	0.570989	-0.030047			1.04497	0.982968	1.1654	0.673155	1.02105
hsa-miR-141-3p	26.6869	26.5369	26.6858	27.0158	27.8252	26.9276		-5.98386	-5.96244	-5.98546	-5.97609	-4.99354	-5.98905			0.0214155	-0.001596	0.0077685	0.990321	-0.005186			0.985266	1.00111	0.99463	0.503366	1.0036
hsa-miR-142-5p	35.1297	34.9649	35.1149	35.4727	36.3942	35.401		2.45897	2.46549	2.44363	2.48085	3.5754	2.48435			0.006521	-0.0153425	0.021874	1.11642	0.025376			0.99549	1.01069	0.984952	0.461236	0.982564
hsa-miR-143-3p	30.5726	30.5211	30.6907	31.1994	32.1766	31.0004		-2.09812	-1.97823	-1.98058	-1.79248	-0.642139	-1.91626			0.119895	0.117543	0.305639	1.45598	0.181865			0.920255	0.921756	0.809083	0.364506	0.881563
hsa-miR-145-5p	29.2682	29.092	29.2548	29.5568	30.2011	29.4555		-3.40252	-3.40739	-3.41641	-3.43512	-2.61765	-3.46112			-0.004863	-0.0138825	-0.0326005	0.784871	-0.0585935			1.00338	1.00967	1.02285	0.580404	1.04145
hsa-miR-146a-5p	31.5947	31.396	31.5627	31.8213	32.5508	31.8167		-1.07605	-1.10336	-1.10852	-1.17062	-0.268022	-1.09997			-0.027311	-0.0324695	-0.094576	0.808027	-0.0239265			1.01911	1.02276	1.06775	0.571162	1.01672
hsa-miR-1471	36.143	36.0557	36.1956	36.3563	37.1806	36.3146		3.47229	3.55629	3.5244	3.36445	4.36184	3.39795			0.0840063	0.0521104	-0.107836	0.889554	-0.0743415			0.943434	0.964524	1.07761	0.539781	1.05288
hsa-miR-148b-3p	24.1717	24.0111	24.1052	24.2852	25.0278	24.2931		-8.49904	-8.48827	-8.56605	-8.70666	-7.79102	-8.62354			0.0107755	-0.0670065	-0.207619	0.708026	-0.124499			0.992559	1.04754	1.15478	0.612157	1.09013
hsa-miR-148b-5p	30.8537	30.6619	30.8181	31.0522	31.877	30.9538		-1.81706	-1.83744	-1.85315	-1.93973	-0.941755	-1.96285			-0.0203817	-0.0360868	-0.122665	0.875308	-0.145789			1.01423	1.02533	1.08874	0.545138	1.10634
hsa-miR-150-5p	30.7316	30.6609	30.7554	31.118	32.0181	30.9805		-1.93915	-1.83846	-1.91582	-1.87389	-0.800725	-1.93616			0.100693	0.023324	0.0652555	1.13842	0.002985			0.932585	0.983963	0.955776	0.454256	0.997933
hsa-miR-153-3p	26.6806	26.5278	26.7384	27.0644	27.912	26.9238		-5.99013	-5.9716	-5.93285	-5.92745	-4.90679	-5.99282			0.0185365	0.057284	0.062686	1.08335	-0.002681			0.987234	0.961072	0.95748	0.471932	1.00186
hsa-miR-16-1-3p	26.5328	26.3169	26.5929	26.7878	27.3225	26.8573		-6.13795	-6.18244	-6.07837	-6.20412	-5.49626	-6.0594			-0.044492	0.059583	-0.0661705	0.641691	0.078551			1.03132	0.959541	1.04693	0.640961	0.947008
hsa-miR-17-3p	24.3061	24.1783	24.2998	24.5737	25.0692	24.53		-8.36461	-8.3211	-8.37145	-8.41822	-7.74955	-8.38661			0.0435049	-0.0068389	-0.0536082	0.615059	-0.0220063			0.970295	1.00475	1.03786	0.652903	1.01537
hsa-miR-17-5p	16.6773	16.5899	16.6803	17.0751	17.8344	16.9161		-15.9935	-15.9095	-15.9909	-15.9168	-14.9844	-16.0006			0.0839315	0.0025535	0.0766625	1.00909	-0.00711			0.943483	0.998232	0.948249	0.49686	1.00494
hsa-miR-181a-3p	26.7487	26.5855	26.8927	27.0886	28.1711	27.0456		-5.92208	-5.91391	-5.77855	-5.90331	-4.64763	-5.87108			0.0081685	0.143523	0.018763	1.27445	0.0509985			0.994354	0.905306	0.987079	0.413383	0.965268
hsa-miR-181a-5p	22.5916	22.5006	22.5632	22.9569	23.7101	22.7591		-10.0791	-9.99873	-10.108	-10.035	-9.10871	-10.1576			0.080385	-0.028904	0.044109	0.970404	-0.078455			0.945805	1.02024	0.969889	0.510363	1.05589
hsa-miR-181c-3p	29.6324	29.3938	29.5839	29.782	30.4989	29.84		-3.03831	-3.10563	-3.08732	-3.20987	-2.31987	-3.07669			-0.0673216	-0.0490167	-0.171566	0.718439	-0.0383853			1.04777	1.03456	1.12628	0.607755	1.02696
hsa-miR-182-5p	21.6539	21.5466	21.6167	21.9065	22.5033	21.7649		-11.0168	-10.9528	-11.0546	-11.0854	-10.3155	-11.1518			0.0640385	-0.037727	-0.068508	0.701382	-0.134913			0.956583	1.0265	1.04863	0.614983	1.09803
hsa-miR-183-5p	21.6539	21.5466	21.6167	21.9065	22.5033	21.7649		-11.0168	-10.9528	-11.0546	-11.0854	-10.3155	-11.1518			0.0640385	-0.037727	-0.068508	0.701382	-0.134913			0.956583	1.0265	1.04863	0.614983	1.09803
hsa-miR-186-5p	22.3634	22.3167	22.3787	22.7702	23.5062	22.538		-10.3073	-10.1827	-10.2926	-10.2217	-9.31257	-10.3787			0.124636	0.0147595	0.085654	0.994755	-0.07136			0.917236	0.989822	0.942357	0.501821	1.05071
hsa-miR-187-3p	26.781	26.6406	26.854	27.0955	28.054	26.9691		-5.88976	-5.85874	-5.81729	-5.89638	-4.7648	-5.94752			0.031027	0.0724745	-0.006615	1.12496	-0.0577595			0.978723	0.951005	1.0046	0.458514	1.04085
hsa-miR-188-3p	32.4232	32.2808	32.4721	32.8552	33.4788	32.7373		-0.247512	-0.218551	-0.199191	-0.136695	0.66005	-0.179329			0.0289603	0.0483211	0.110817	0.907562	0.0681826			0.980126	0.967061	0.926063	0.533085	0.953839
hsa-miR-18a-5p	20.1676	20.0402	20.1422	20.5185	21.242	20.3465		-12.5032	-12.4592	-12.5291	-12.4733	-11.5768	-12.5702			0.044011	-0.025879	0.02985	0.926391	-0.0669725			0.969955	1.0181	0.979522	0.526173	1.04752
hsa-miR-18b-5p	19.5572	19.3938	19.5511	19.87	20.5431	19.7865		-13.1135	-13.1055	-13.1201	-13.1219	-12.2756	-13.1302			0.0079965	-0.006598	-0.0083815	0.837894	-0.016662			0.994473	1.00458	1.00583	0.55946	1.01162
hsa-miR-190a-5p	27.4479	27.2305	27.4358	27.6737	28.6365	27.6187		-5.22288	-5.26888	-5.23549	-5.31821	-4.18232	-5.29794			-0.046006	-0.0126115	-0.095327	1.04056	-0.0750625			1.0324	1.00878	1.06831	0.48614	1.05341
hsa-miR-191-3p	29.7808	29.5786	29.8009	29.8969	30.6532	29.9745		-2.88994	-2.92083	-2.87031	-3.095	-2.16553	-2.94212			-0.0308876	0.0196277	-0.205057	0.724411	-0.0521825			1.02164	0.986487	1.15273	0.605244	1.03683
hsa-miR-193b-3p	22.3781	22.3268	22.3501	22.7225	23.3542	22.5828		-10.2927	-10.1726	-10.3211	-10.2693	-9.46455	-10.3338			0.120071	-0.0284945	0.023307	0.828102	-0.0411725			0.920143	1.01995	0.983975	0.56327	1.02895
hsa-miR-194-5p	25.6377	25.4012	25.7661	25.8702	26.8682	25.8707		-7.03302	-7.09816	-6.90519	-7.12172	-5.95062	-7.04597			-0.0651435	0.127834	-0.0887015	1.0824	-0.0129495			1.04619	0.915205	1.06341	0.472242	1.00902
hsa-miR-195-5p	23.2396	23.1374	23.3411	23.7438	24.5408	23.598		-9.43114	-9.36196	-9.33017	-9.24804	-8.27803	-9.31862			0.0691795	0.10097	0.183103	1.15312	0.112527			0.95318	0.932406	0.880807	0.449653	0.924967
hsa-miR-196a-5p	20.5857	20.4938	20.558	20.7334	21.3672	20.6899		-12.0851	-12.0055	-12.1132	-12.2585	-11.4516	-12.2268			0.0795555	-0.0281265	-0.173364	0.633498	-0.141681			0.946349	1.01969	1.12769	0.644612	1.10319
hsa-miR-196b-3p	28.7487	28.6479	28.7832	29.069	29.6388	29.0225		-3.92206	-3.85145	-3.88804	-3.92288	-3.17999	-3.89415			0.0706084	0.0340198	-0.000824629	0.742064	0.027909			0.952236	0.976695	1.00057	0.597883	0.980841
hsa-miR-196b-5p	20.067	19.8943	20.0195	20.3784	21.1092	20.2637		-12.6037	-12.6051	-12.6518	-12.6135	-11.7095	-12.6529			-0.0013575	-0.04801	-0.009711	0.894206	-0.0491815			1.00094	1.03384	1.00675	0.538043	1.03468
hsa-miR-199b-5p	35.2441	35.1436	35.3528	35.5465	36.2108	35.4798		2.57336	2.64424	2.68155	2.55459	3.39198	2.56316			0.070882	0.10819	-0.018769	0.818623	-0.010195			0.952056	0.927751	1.01309	0.566983	1.00709
hsa-miR-19a-3p	15.381	15.2277	15.3102	15.5032	16.1214	15.4251		-17.2898	-17.2717	-17.3611	-17.4887	-16.6973	-17.4916			0.0181065	-0.0712962	-0.198954	0.592429	-0.201831			0.987528	1.05066	1.14787	0.663225	1.15016
hsa-miR-19b-1-5p	26.883	26.7825	26.8875	27.2057	27.9208	27.1177		-5.7877	-5.71691	-5.78377	-5.78619	-4.89801	-5.79895			0.0707972	0.00393323	0.00151225	0.889699	-0.0112422			0.952112	0.997277	0.998952	0.539727	1.00782
hsa-miR-200a-3p	31.2891	31.117	31.2734	31.4842	32.5899	31.4178		-1.38161	-1.38238	-1.39788	-1.50765	-0.228918	-1.49889			-0.0007715	-0.016274	-0.126042	1.15269	-0.117283			1.00053	1.01134	1.0913	0.449786	1.08469
hsa-miR-205-5p	28.4827	28.4158	28.5463	28.8717	29.5906	28.7115		-4.18804	-4.08359	-4.12496	-4.12018	-3.22819	-4.20519			0.104457	0.063084	0.067859	0.959857	-0.017146			0.930155	0.957216	0.954053	0.514108	1.01196
hsa-miR-20a-3p	23.9254	23.7729	24.0275	24.2932	25.0356	24.228		-8.74537	-8.72649	-8.64373	-8.69865	-7.78313	-8.68862			0.018883	0.101641	0.046725	0.962239	0.0567523			0.986997	0.931972	0.968132	0.51326	0.961426
hsa-miR-20a-5p	16.4523	16.3424	16.5235	16.9224	17.688	16.8214		-16.2184	-16.1569	-16.1477	-16.0695	-15.1307	-16.0953			0.061479	0.0706885	0.148951	1.08767	0.123139			0.958281	0.952183	0.901906	0.470521	0.918188
hsa-miR-210-3p	24.4493	24.3478	24.4649	24.7455	25.31	24.6714		-8.22148	-8.15157	-8.20635	-8.24642	-7.50879	-8.2453			0.0699055	0.015128	-0.0249455	0.71269	-0.02382			0.9527	0.989569	1.01744	0.610182	1.01665
hsa-miR-212-5p	30.0709	29.8492	30.0043	30.1286	30.7594	30.2049		-2.59985	-2.65017	-2.66694	-2.86326	-2.05943	-2.7118			-0.0503139	-0.0670909	-0.263406	0.540426	-0.111949			1.03549	1.0476	1.20031	0.687568	1.08069
hsa-miR-214-3p	33.7185	33.5904	33.7586	33.9663	34.9355	33.8779		1.04779	1.09099	1.08737	0.974373	2.11677	0.961265			0.0431905	0.0395785	-0.0734225	1.06898	-0.08653			0.970506	0.972939	1.05221	0.476657	1.06181
hsa-miR-21-5p	19.2624	19.0751	19.3141	19.5218	20.5014	19.4683		-13.4083	-13.4243	-13.3571	-13.4701	-12.3174	-13.4484			-0.015949	0.0511865	-0.06178	1.09092	-0.0400665			1.01112	0.965142	1.04375	0.469463	1.02816
hsa-miR-216a-5p	35.4369	35.3032	35.3658	35.6485	36.4599	35.5416		2.76612	2.80385	2.69452	2.6566	3.64116	2.62494			0.0377275	-0.0715965	-0.10952	0.875039	-0.141184			0.974188	1.05088	1.07887	0.545239	1.10281
hsa-miR-216b-5p	33.4347	33.2892	33.4035	33.6254	34.5474	33.5291		0.76397	0.789856	0.732229	0.633519	1.72858	0.612454			0.0258855	-0.0317415	-0.130451	0.964608	-0.151516			0.982218	1.02225	1.09464	0.512417	1.11074
hsa-miR-219a-1-3p	34.6851	34.5616	34.744	34.939	35.7599	34.9254		2.01431	2.06227	2.07278	1.9471	2.94109	2.00874			0.0479544	0.0584666	-0.0672122	0.926772	-0.00557263			0.967307	0.960284	1.04769	0.526034	1.00387
hsa-miR-219a-5p	25.0405	24.8622	25.1091	25.3819	26.0239	25.3416		-7.63024	-7.63715	-7.56214	-7.60996	-6.7949	-7.5751			-0.006913	0.0680995	0.0202805	0.835334	0.0551335			1.0048	0.953894	0.986041	0.560453	0.962505
hsa-miR-22-3p	28.0078	27.8981	27.9706	28.3273	28.8835	28.1636		-4.663	-4.60129	-4.70062	-4.66462	-3.93532	-4.7531			0.0617095	-0.03762	-0.0016175	0.727678	-0.090096			0.958128	1.02642	1.00112	0.603875	1.06444
hsa-miR-224-3p	27.5013	27.318	27.6167	27.779	28.5134	27.7454		-5.1695	-5.18136	-5.05453	-5.21289	-4.3054	-5.17128			-0.0118683	0.11497	-0.0433984	0.864098	-0.00178654			1.00826	0.923402	1.03054	0.54939	1.00124
hsa-miR-224-5p	29.2464	29.03	29.2042	29.4288	30.2247	29.4078		-3.4244	-3.46942	-3.46706	-3.56307	-2.59407	-3.50882			-0.045022	-0.042663	-0.138672	0.830329	-0.0844215			1.0317	1.03001	1.10089	0.562401	1.06026
hsa-miR-22-5p	30.5903	30.4001	30.6984	30.9483	31.6987	30.97		-2.08043	-2.09933	-1.97287	-2.04355	-1.12011	-1.94664			-0.018894	0.107559	0.036886	0.960318	0.133795			1.01318	0.928157	0.974757	0.513944	0.911431
hsa-miR-23b-3p	19.9717	19.8101	19.9717	20.2636	20.9234	20.224		-12.699	-12.6893	-12.6995	-12.7282	-11.8954	-12.6927			0.009758	-0.000483	-0.0292215	0.803604	0.006335			0.993259	1.00033	1.02046	0.572916	0.995619
hsa-miR-23b-5p	31.6863	31.6326	31.7006	32.0934	32.8461	31.9955		-0.984495	-0.866787	-0.970625	-0.898509	0.0273628	-0.921121			0.117708	0.0138694	0.0859855	1.01186	0.0633738			0.921651	0.990433	0.942141	0.495907	0.957023
hsa-miR-24-1-5p	28.7917	28.6288	28.9012	29.2706	30.0106	29.1549		-3.87902	-3.87054	-3.77007	-3.72125	-2.80814	-3.76176			0.00847686	0.10894	0.157765	1.07088	0.117253			0.994142	0.927269	0.896413	0.476029	0.921941
hsa-miR-25-5p	30.8496	30.7471	30.9902	31.3086	32.1496	31.1937		-1.82111	-1.75224	-1.68105	-1.68329	-0.669219	-1.72294			0.0688731	0.140062	0.137827	1.15189	0.0981692			0.953382	0.90748	0.908887	0.450034	0.934218
hsa-miR-26a-5p	18.9496	18.7729	19.0473	19.265	19.9098	19.2744		-13.7211	-13.7265	-13.6239	-13.7269	-12.909	-13.6423			-0.005313	0.0972035	-0.0057155	0.812189	0.0788355			1.00369	0.934843	1.00397	0.569517	0.946822
hsa-miR-26b-3p	31.0456	30.8925	30.9866	31.3062	31.9691	31.2088		-1.62517	-1.60684	-1.6846	-1.68571	-0.849653	-1.70787			0.0183253	-0.0594384	-0.0605449	0.775512	-0.0827054			0.987378	1.04206	1.04286	0.584181	1.059
hsa-miR-27a-3p	18.3625	18.2623	18.3837	18.7204	19.3466	18.6073		-14.3082	-14.237	-14.2875	-14.2714	-13.4722	-14.3094			0.0711755	0.0207	0.0367665	0.836022	-0.001183			0.951862	0.985754	0.974837	0.560186	1.00082
hsa-miR-28-3p	25.1279	24.9427	25.0836	25.5031	26.1868	25.3725		-7.54284	-7.55669	-7.58769	-7.48882	-6.63196	-7.54414			-0.0138405	-0.0448463	0.0540221	0.910885	-0.00129445			1.00964	1.03157	0.963247	0.531859	1.0009
hsa-miR-299-5p	34.2602	34.1952	34.264	34.5562	36.0442	34.3912		1.58948	1.69582	1.59278	1.56434	3.22539	1.47456			0.106335	0.0033	-0.02514	1.63591	-0.11492			0.928945	0.997715	1.01758	0.321768	1.08292
hsa-miR-29b-3p	27.5596	27.4198	27.5081	27.805	28.6	27.6925		-5.1112	-5.07959	-5.16309	-5.18686	-4.21875	-5.22417			0.0316125	-0.0518955	-0.075661	0.89245	-0.112968			0.978326	1.03663	1.05384	0.538699	1.08145
hsa-miR-29c-3p	23.9232	23.7557	24.0342	24.313	25.1947	24.2662		-8.74755	-8.74372	-8.63705	-8.67884	-7.62404	-8.65042			0.003827	0.110496	0.0687075	1.12351	0.097128			0.997351	0.92627	0.953492	0.458975	0.934892
hsa-miR-301b	23.8846	23.7684	23.9442	24.2295	24.9192	24.1193		-8.78619	-8.73096	-8.72708	-8.7624	-7.89958	-8.79736			0.055236	0.059113	0.0237895	0.886616	-0.0111705			0.962437	0.959854	0.983646	0.540882	1.00777
hsa-miR-30b-5p	21.5044	21.4264	21.5766	21.8766	22.5717	21.8012		-11.1664	-11.0729	-11.0946	-11.1152	-10.2471	-11.1155			0.09344	0.0717275	0.05114	0.91928	0.0508825			0.937285	0.951498	0.965173	0.528773	0.965346
hsa-miR-30d-5p	20.4729	20.3683	20.4591	20.8565	21.3902	20.7299		-12.1979	-12.1311	-12.2121	-12.1354	-11.4286	-12.1868			0.066751	-0.014257	0.062456	0.769303	0.0110805			0.954786	1.00993	0.957632	0.586701	0.992349
hsa-miR-30e-3p	22.1848	21.981	22.1334	22.4512	23.3015	22.3721		-10.486	-10.5184	-10.5378	-10.5407	-9.51732	-10.5445			-0.032458	-0.0518255	-0.0547	0.968648	-0.058581			1.02275	1.03658	1.03864	0.510985	1.04144
hsa-miR-31-3p	23.4487	23.3265	23.5296	23.9231	24.7671	23.8552		-9.22201	-9.17285	-9.1416	-9.06878	-8.05169	-9.0615			0.049161	0.0804045	0.153229	1.17032	0.16051			0.966498	0.945792	0.899236	0.444324	0.894709
hsa-miR-31-5p	22.7334	22.6258	22.7851	23.0789	23.7074	22.9421		-9.93733	-9.87361	-9.88611	-9.913	-9.11137	-9.9746			0.063721	0.0512185	0.0243225	0.82596	-0.037278			0.956793	0.965121	0.983282	0.564107	1.02618
hsa-miR-324-3p	23.7705	23.6228	23.8579	24.1277	24.8232	23.9832		-8.9003	-8.87657	-8.81337	-8.86422	-7.9956	-8.93345			0.0237295	0.086929	0.0360795	0.904705	-0.033154			0.983686	0.941525	0.975302	0.534142	1.02325
hsa-miR-324-5p	23.0247	22.8749	22.9924	23.3621	23.8735	23.212		-9.64603	-9.62452	-9.67886	-9.62982	-8.94525	-9.70462			0.0215035	-0.032834	0.016207	0.700779	-0.058591			0.985205	1.02302	0.988829	0.61524	1.04145
hsa-miR-32-5p	24.9986	24.8468	25.0773	25.4704	26.1241	25.3446		-7.67215	-7.65253	-7.59391	-7.52151	-6.69469	-7.57205			0.019618	0.078236	0.150643	0.977459	0.100103			0.986494	0.947215	0.900849	0.507873	0.932966
hsa-miR-326	28.8674	28.6562	28.8246	28.9702	30.0679	29.0081		-3.80334	-3.84317	-3.84667	-4.02169	-2.75087	-3.90858			-0.039828	-0.0433305	-0.218349	1.05247	-0.10524			1.02799	1.03049	1.1634	0.482141	1.07567
hsa-miR-331-3p	23.7837	23.5832	23.7995	24.0024	24.8312	23.9811		-8.88703	-8.91619	-8.87174	-8.98953	-7.98758	-8.93555			-0.0291555	0.015298	-0.102493	0.89945	-0.0485145			1.02041	0.989452	1.07363	0.536091	1.0342
hsa-miR-338-3p	28.8817	28.7861	28.8375	29.2707	29.9001	29.0912		-3.78906	-3.71331	-3.83373	-3.7212	-2.91872	-3.8255			0.0757515	-0.044673	0.0678575	0.870334	-0.036438			0.948848	1.03145	0.954054	0.54702	1.02558
hsa-miR-339-3p	25.0347	24.9123	25.0304	25.2333	25.8539	25.1824		-7.63605	-7.58712	-7.64085	-7.75857	-6.96491	-7.73423			0.0489247	-0.00480433	-0.122522	0.671137	-0.0981782			0.966657	1.00334	1.08864	0.628011	1.07042
hsa-miR-33a-5p	28.5484	28.4407	28.4904	28.8807	29.6962	28.7345		-4.12239	-4.0587	-4.18088	-4.11121	-3.12259	-4.18218			0.0636875	-0.058493	0.01118	0.999804	-0.059786			0.956815	1.04138	0.992281	0.500068	1.04231
hsa-miR-340-3p	27.2609	27.1158	27.2541	27.4422	28.1577	27.4002		-5.4099	-5.38358	-5.41717	-5.54965	-4.66104	-5.51647			0.0263201	-0.00727721	-0.139758	0.748857	-0.106576			0.981922	1.00506	1.10172	0.595075	1.07667
hsa-miR-340-5p	23.9612	23.8151	23.9517	24.3331	25.0417	24.2212		-8.70951	-8.68427	-8.71951	-8.65883	-7.7771	-8.6955			0.025243	-0.0099975	0.0506845	0.932414	0.0140155			0.982655	1.00695	0.965478	0.523981	0.990332
hsa-miR-34a-3p	25.2377	25.055	25.3021	25.4895	26.1038	25.4477		-7.43302	-7.44439	-7.36915	-7.50243	-6.71496	-7.46895			-0.0113676	0.0638736	-0.0694039	0.718058	-0.0359309			1.00791	0.956692	1.04928	0.607915	1.02522
hsa-miR-34a-5p	23.0761	22.853	23.0577	23.2897	24.138	23.2619		-9.59461	-9.64634	-9.61352	-9.70219	-8.68079	-9.6548			-0.051732	-0.018916	-0.10758	0.913821	-0.060189			1.03651	1.0132	1.07742	0.530777	1.0426
hsa-miR-34c-3p	27.041	26.8826	27.0933	27.4277	28.0484	27.2961		-5.62971	-5.61679	-5.57791	-5.56417	-4.77039	-5.62052			0.012918	0.0517975	0.0655375	0.859313	0.0091845			0.991086	0.964734	0.955589	0.551215	0.993654
hsa-miR-34c-5p	26.3373	26.2753	26.3105	26.7334	27.5736	26.5307		-6.33343	-6.22412	-6.36076	-6.25848	-5.24516	-6.38594			0.109308	-0.027332	0.0749475	1.08826	-0.052514			0.927033	1.01913	0.949377	0.470327	1.03707
hsa-miR-361-5p	21.3054	21.1593	21.3264	21.5939	22.333	21.5008		-11.3653	-11.3401	-11.3448	-11.398	-10.4858	-11.4158			0.0252645	0.0205325	-0.032662	0.87957	-0.050491			0.98264	0.985869	1.0229	0.54353	1.03562
hsa-miR-362-5p	28.0892	27.9559	28.1758	28.4637	29.2484	28.3552		-4.58152	-4.5435	-4.49548	-4.52818	-3.57039	-4.56144			0.0380245	0.0860415	0.0533395	1.01113	0.0200775			0.973988	0.942104	0.963703	0.496159	0.98618
hsa-miR-365a-3p	23.4928	23.4234	23.5306	23.8233	24.6158	23.7447		-9.178	-9.076	-9.14067	-9.16853	-8.20298	-9.17196			0.102004	0.037328	0.0094685	0.975027	0.00604			0.931738	0.974458	0.993458	0.508731	0.995822
hsa-miR-373-3p	34.4162	34.2776	34.4162	34.7377	35.7509	34.6547		1.74542	1.77826	1.74493	1.74577	2.93212	1.73804			0.032839	-0.0004895	0.0003485	1.1867	-0.0073785			0.977495	1.00034	0.999758	0.439306	1.00513
hsa-miR-373-5p	31.8232	31.6897	31.8084	32.1584	33.0179	32.0619		-0.847522	-0.809673	-0.862855	-0.833505	0.199089	-0.85472			0.037849	-0.015333	0.014017	1.04661	-0.0071985			0.974106	1.01068	0.990331	0.484104	1.005
hsa-miR-374a-5p	21.0157	20.8776	21.0179	21.4382	22.0617	21.3089		-11.6551	-11.6218	-11.6534	-11.5537	-10.7571	-11.6078			0.0333025	0.001694	0.101387	0.898008	0.0472645			0.977181	0.998826	0.932136	0.536627	0.96777
hsa-miR-374b-3p	27.8667	27.7313	27.8671	28.1716	28.9251	28.1022		-4.80409	-4.76811	-4.80411	-4.82028	-3.89371	-4.8145			0.0359825	-2.3e-05	-0.0161875	0.910375	-0.0104115			0.975367	1.00002	1.01128	0.532047	1.00724
hsa-miR-378a-5p	29.1722	28.9906	29.1609	29.2938	30.0541	29.3257		-3.49859	-3.50873	-3.51037	-3.69808	-2.76464	-3.591			-0.010145	-0.0117868	-0.199492	0.733942	-0.0924167			1.00706	1.0082	1.14829	0.601259	1.06615
hsa-miR-421	24.7272	24.4906	24.779	25.096	25.6833	25.0786		-7.94354	-8.00874	-7.89228	-7.89584	-7.13549	-7.83811			-0.0652015	0.0512655	0.047705	0.808053	0.105435			1.04623	0.965089	0.967474	0.571152	0.929525
hsa-miR-424-5p	24.3425	24.1714	24.2836	24.5024	25.2949	24.4067		-8.32822	-8.32794	-8.38764	-8.48948	-7.52388	-8.50999			0.0002865	-0.0594135	-0.161254	0.80434	-0.181763			0.999801	1.04204	1.11826	0.572624	1.13427
hsa-miR-425-3p	26.6919	26.5544	26.7146	27.075	27.73	26.9776		-5.97881	-5.94495	-5.95662	-5.91685	-5.08874	-5.93903			0.033865	0.0221905	0.0619565	0.89007	0.0397835			0.9768	0.984736	0.957964	0.539588	0.972801
hsa-miR-429	29.8802	29.7358	29.8823	30.0983	30.8334	30.0435		-2.79056	-2.76358	-2.78891	-2.89361	-1.98534	-2.87313			0.0269815	0.0016545	-0.103042	0.805222	-0.08257			0.981472	0.998854	1.07404	0.572274	1.0589
hsa-miR-450a-5p	25.4245	25.2285	25.4005	25.5723	26.5773	25.5532		-7.2463	-7.27085	-7.27075	-7.41958	-6.24145	-7.36345			-0.024553	-0.024453	-0.173281	1.00484	-0.117152			1.01716	1.01709	1.12762	0.498325	1.08459
hsa-miR-451a	31.3379	31.2549	31.3304	31.7237	32.5309	31.5727		-1.3329	-1.24452	-1.34085	-1.26822	-0.287904	-1.34398			0.088381	-0.0079475	0.064674	1.04499	-0.011085			0.940578	1.00552	0.956161	0.484647	1.00771
hsa-miR-452-5p	24.5103	24.3765	24.6134	25.0381	25.9213	24.9174		-8.16049	-8.12292	-8.05784	-7.95378	-6.89749	-7.99928			0.037569	0.102653	0.206708	1.263	0.161216			0.974295	0.931319	0.866512	0.416677	0.894271
hsa-miR-454-3p	21.6798	21.592	21.748	22.0759	22.7655	21.9001		-10.991	-10.9074	-10.9232	-10.916	-10.0533	-11.0166			0.0835765	0.0677425	0.074971	0.937689	-0.0255755			0.943715	0.95413	0.949361	0.522069	1.01789
hsa-miR-455-3p	24.9484	24.7521	24.9966	25.1725	25.9083	25.1917		-7.72232	-7.74723	-7.67464	-7.81942	-6.9105	-7.72495			-0.0249078	0.0476821	-0.0970946	0.811818	-0.00263188			1.01741	0.96749	1.06962	0.569664	1.00183
hsa-miR-455-5p	28.2481	28.0707	28.3222	28.6613	29.1769	28.5801		-4.42268	-4.42868	-4.34904	-4.33062	-3.64188	-4.33654			-0.005993	0.073647	0.0920665	0.780804	0.0861435			1.00416	0.950233	0.938178	0.582042	0.942038
hsa-miR-483-3p	31.5711	31.4353	31.574	31.9391	32.9495	31.8122		-1.09962	-1.06409	-1.09725	-1.05281	0.130734	-1.10442			0.0355305	0.002377	0.046811	1.23036	-0.0048			0.975673	0.998354	0.968074	0.426212	1.00333
hsa-miR-485-3p	30.8939	30.6987	30.8632	31.1507	31.94	31.1096		-1.77684	-1.80073	-1.80801	-1.84119	-0.878752	-1.80708			-0.0238885	-0.0311745	-0.064357	0.898086	-0.030244			1.0167	1.02184	1.04562	0.536598	1.02118
hsa-miR-489-3p	30.0539	29.9506	30.0925	30.4607	31.1255	30.32		-2.61686	-2.54878	-2.57876	-2.53116	-1.69326	-2.5967			0.0680821	0.0381062	0.0857003	0.923606	0.0201651			0.953905	0.973933	0.942327	0.52719	0.98612
hsa-miR-491-3p	28.3238	28.2201	28.2837	28.6677	29.4624	28.5455		-4.34691	-4.27929	-4.38751	-4.32415	-3.35637	-4.37114			0.0676265	-0.0405975	0.02276	0.990546	-0.024222			0.954207	1.02854	0.984348	0.503287	1.01693
hsa-miR-497-5p	31.1845	31.0065	31.1209	31.3275	31.9894	31.306		-1.48623	-1.4929	-1.55034	-1.66437	-0.829363	-1.61063			-0.006664	-0.0641095	-0.178136	0.656869	-0.124397			1.00463	1.04544	1.13142	0.634253	1.09005
hsa-miR-500a-5p	24.1403	24.0923	24.1552	24.5849	25.3269	24.389		-8.53046	-8.40711	-8.51602	-8.40701	-7.49193	-8.52766			0.123354	0.0144445	0.123454	1.03854	0.002806			0.918051	0.990038	0.917987	0.48682	0.998057
hsa-miR-501-3p	27.4731	27.2895	27.4892	27.6989	28.7348	27.6575		-5.19763	-5.20992	-5.18203	-5.29294	-4.08399	-5.25915			-0.0122936	0.0155963	-0.0953105	1.11363	-0.0615184			1.00856	0.989248	1.0683	0.462128	1.04356
hsa-miR-501-5p	25.1701	25.0456	25.1465	25.4798	26.1004	25.3879		-7.50065	-7.45375	-7.52473	-7.51212	-6.71837	-7.52878			0.0468985	-0.024083	-0.011475	0.78228	-0.028134			0.968015	1.01683	1.00799	0.581447	1.01969
hsa-miR-502-5p	26.0641	25.9481	26.021	26.3787	27.2936	26.2146		-6.60667	-6.55125	-6.65028	-6.61318	-5.52522	-6.70204			0.0554185	-0.0436125	-0.006513	1.08145	-0.0953675			0.962315	1.03069	1.00452	0.472555	1.06834
hsa-miR-503-5p	28.1855	28.0072	28.1913	28.4354	29.2284	28.3679		-4.48523	-4.49216	-4.4799	-4.5565	-3.59037	-4.54873			-0.0069285	0.005328	-0.0712705	0.894865	-0.063496			1.00481	0.996314	1.05064	0.537798	1.04499
hsa-miR-504-5p	36.0539	35.9539	36.1341	36.4126	37.3286	36.3126		3.38316	3.45453	3.46288	3.42073	4.50987	3.39595			0.0713755	0.0797206	0.0375764	1.12672	0.0127959			0.95173	0.946241	0.97429	0.457957	0.99117
hsa-miR-509-3p	33.5767	33.4713	33.5986	33.9838	34.6941	33.8528		0.905925	0.971957	0.927365	0.991878	1.87533	0.936115			0.066032	0.02144	0.0859535	0.969407	0.03019			0.955262	0.985249	0.942162	0.510716	0.979291
hsa-miR-518c-5p	34.1005	33.9655	34.0993	34.4341	35.3074	34.2739		1.42971	1.46613	1.42801	1.44223	2.48862	1.35724			0.036425	-0.001697	0.012519	1.05892	-0.072465			0.975068	1.00118	0.99136	0.479993	1.05151
hsa-miR-518e-5p	33.6792	33.5292	33.7292	33.8792	34.9367	33.8792		1.00844	1.02981	1.05795	0.887306	2.11792	0.962525			0.0213755	0.049512	-0.121129	1.10949	-0.04591			0.985293	0.966263	1.08759	0.463459	1.03233
hsa-miR-520c-3p	32.1216	32.0178	32.1055	32.4321	33.302	32.3214		-0.549158	-0.481624	-0.565753	-0.559799	0.483261	-0.595266			0.067534	-0.0165955	-0.0106415	1.03242	-0.046109			0.954268	1.01157	1.0074	0.48889	1.03248
hsa-miR-532-3p	24.8834	24.6781	24.9464	25.1197	25.8075	25.1231		-7.78734	-7.82132	-7.72482	-7.87217	-7.01129	-7.79356			-0.0339811	0.0625216	-0.0848334	0.776047	-0.00622361			1.02383	0.957589	1.06057	0.583965	1.00432
hsa-miR-542-5p	28.7099	28.5798	28.6847	29.0655	29.6084	28.9339		-3.9609	-3.91963	-3.98659	-3.92642	-3.21035	-3.9828			0.041271	-0.0256895	0.034473	0.750547	-0.021902			0.971798	1.01797	0.976388	0.594378	1.0153
hsa-miR-545-3p	29.8059	29.6377	29.7856	30.0491	30.8139	29.9558		-2.86481	-2.86167	-2.88565	-2.94275	-2.00489	-2.96084			0.003135	-0.0208465	-0.0779455	0.859921	-0.0960345			0.997829	1.01455	1.05551	0.550983	1.06883
hsa-miR-548a-3p	29.0104	28.8054	29.0354	29.2477	30.052	29.2259		-3.66032	-3.694	-3.63586	-3.74422	-2.76674	-3.69079			-0.0336816	0.024455	-0.0839002	0.893582	-0.0304744			1.02362	0.983192	1.05988	0.538276	1.02135
hsa-miR-548k	29.4441	29.305	29.4376	29.7439	30.477	29.6572		-3.22664	-3.19434	-3.23366	-3.248	-2.34175	-3.25942			0.0323059	-0.00701666	-0.0213582	0.884889	-0.0327806			0.977856	1.00488	1.01491	0.541529	1.02298
hsa-miR-550a-3p	27.8428	27.7492	27.9525	28.2375	29.0088	28.1378		-4.82797	-4.75019	-4.71879	-4.75437	-3.80994	-4.77885			0.07778	0.109184	0.0735997	1.01803	0.0491202			0.947515	0.927113	0.950264	0.49379	0.966526
hsa-miR-550a-5p	28.5538	28.4486	28.6555	28.8856	29.8191	28.7983		-4.11692	-4.05075	-4.01572	-4.10625	-2.99968	-4.1184			0.066176	0.1012	0.010674	1.11725	-0.0014795			0.955166	0.932257	0.992629	0.460972	1.00103
hsa-miR-556-3p	28.574	28.3764	28.639	28.7746	29.5284	28.7871		-4.09678	-4.12293	-4.03226	-4.21733	-3.29035	-4.12954			-0.0261549	0.0645186	-0.12055	0.806431	-0.0327571			1.01829	0.956264	1.08715	0.571794	1.02297
hsa-miR-556-5p	33.682	33.5619	33.7576	34.0384	34.7212	33.9848		1.01122	1.06252	1.08634	1.0465	1.90244	1.06811			0.0512987	0.0751117	0.0352761	0.891213	0.0568892			0.965067	0.949269	0.975845	0.53916	0.961335
hsa-miR-561-3p	34.1631	34.0433	34.2076	34.4499	35.1609	34.4362		1.49239	1.54393	1.53634	1.45798	2.34212	1.51952			0.0515391	0.0439519	-0.0344079	0.849731	0.0271318			0.964906	0.969994	1.02414	0.554888	0.981369
hsa-miR-572	29.2897	29.1904	29.3038	29.7422	30.6178	29.5537		-3.38109	-3.30895	-3.36741	-3.24964	-2.20101	-3.36299			0.0721395	0.0136765	0.131447	1.18008	0.0180955			0.951226	0.990565	0.912915	0.441328	0.987535
hsa-miR-574-3p	25.4213	25.2981	25.4695	25.6738	26.6111	25.5976		-7.24946	-7.20125	-7.20177	-7.31812	-6.20766	-7.31904			0.048213	0.0476885	-0.068652	1.0418	-0.069579			0.967134	0.967485	1.04874	0.485721	1.04941
hsa-miR-576-3p	29.2117	29.0217	29.2089	29.5197	30.0946	29.4694		-3.4591	-3.47768	-3.46229	-3.47218	-2.72418	-3.44723			-0.018584	-0.0031945	-0.013078	0.734917	0.011866			1.01296	1.00222	1.00911	0.600853	0.991809
hsa-miR-576-5p	26.9098	26.7747	26.8687	27.259	27.9392	27.1095		-5.76095	-5.72465	-5.80256	-5.73291	-4.87962	-5.80713			0.0363035	-0.041609	0.028044	0.881332	-0.0461735			0.97515	1.02926	0.980749	0.542866	1.03252
hsa-miR-580-3p	30.713	30.4863	30.6663	30.8606	31.6141	30.9505		-1.95776	-2.01304	-2.00492	-2.13123	-1.20463	-1.96615			-0.0552805	-0.047158	-0.173473	0.75313	-0.00839135			1.03906	1.03323	1.12777	0.593315	1.00583
hsa-miR-582-5p	24.6156	24.4537	24.6449	24.9832	25.7083	24.8659		-8.05512	-8.04566	-8.02631	-8.00873	-7.11046	-8.05078			0.0094645	0.028813	0.0463935	0.944657	0.00434			0.993461	0.980226	0.968354	0.519553	0.996996
hsa-miR-589-3p	27.1573	27.0034	27.1509	27.3939	28.3415	27.3135		-5.51349	-5.49599	-5.52037	-5.59794	-4.47728	-5.60319			0.0174954	-0.00687712	-0.0844547	1.03621	-0.0896986			0.987946	1.00478	1.06029	0.487608	1.06415
hsa-miR-589-5p	26.2383	26.0144	26.2511	26.5524	27.2689	26.5225		-6.43247	-6.48498	-6.42013	-6.43949	-5.54986	-6.39421			-0.052512	0.012338	-0.0070195	0.882612	0.0382635			1.03707	0.991484	1.00488	0.542385	0.973826
hsa-miR-592	32.5603	32.4007	32.6722	32.908	33.8058	32.9489		-0.110404	-0.0986841	0.000998948	-0.0838435	0.987	0.0322077			0.0117197	0.111403	0.0265603	1.0974	0.142612			0.991909	0.925688	0.981758	0.467357	0.905878
hsa-miR-624-5p	31.1869	30.996	31.1768	31.3995	32.3116	31.4393		-1.48385	-1.50336	-1.49448	-1.59234	-0.507199	-1.47736			-0.01951	-0.0106315	-0.108485	0.976653	0.00649108			1.01362	1.0074	1.0781	0.508157	0.995511
hsa-miR-628-5p	27.341	27.1496	27.3188	27.6575	28.286	27.6231		-5.3298	-5.34977	-5.3524	-5.33441	-4.53282	-5.29357			-0.0199707	-0.0226075	-0.00460976	0.796974	0.0362269			1.01394	1.01579	1.0032	0.575555	0.975202
hsa-miR-629-5p	27.3279	27.1436	27.3824	27.6402	28.2483	27.5979		-5.34286	-5.35576	-5.28888	-5.35172	-4.57052	-5.31878			-0.0129005	0.053977	-0.0088605	0.772336	0.024081			1.00898	0.963277	1.00616	0.585469	0.983447
hsa-miR-636	31.3588	31.2499	31.3851	31.6592	32.5393	31.5919		-1.31196	-1.24951	-1.28613	-1.33266	-0.279484	-1.32481			0.0624501	0.0258325	-0.0206963	1.03248	-0.0128486			0.957636	0.982254	1.01445	0.488869	1.00895
hsa-miR-651-5p	29.2237	29.0239	29.2157	29.5008	30.2282	29.4489		-3.44705	-3.47546	-3.45551	-3.49109	-2.59056	-3.46781			-0.0284125	-0.008457	-0.0440365	0.856489	-0.020761			1.01989	1.00588	1.03099	0.552295	1.01449
hsa-miR-659-3p	33.6967	33.4768	33.6961	33.8538	34.896	33.8692		1.02595	0.977465	1.0249	0.861894	2.07727	0.952498			-0.0484827	-0.00104342	-0.164054	1.05132	-0.0734494			1.03418	1.00072	1.12043	0.482525	1.05223
hsa-miR-671-5p	28.262	28.1064	28.3143	28.586	29.4472	28.5302		-4.40877	-4.39295	-4.35693	-4.40589	-3.37154	-4.38647			0.0158205	0.051841	0.0028825	1.03723	0.022295			0.989094	0.964704	0.998004	0.487261	0.984665
hsa-miR-7-1-3p	24.2827	24.2084	24.368	24.8725	25.3959	24.6555		-8.38806	-8.29096	-8.30328	-8.11937	-7.42288	-8.26116			0.097093	0.0847733	0.268693	0.965182	0.126895			0.934915	0.942933	0.830071	0.512214	0.915801
hsa-miR-744-5p	26.7758	26.6934	26.7198	27.1904	27.8229	27.0345		-5.89493	-5.80602	-5.9514	-5.80148	-4.9959	-5.88219			0.0889115	-0.0564695	0.0934525	0.89903	0.0127455			0.940232	1.03992	0.937277	0.536247	0.991204
hsa-miR-758-3p	35.8158	35.7648	35.8957	36.1426	36.9659	35.9601		3.14506	3.26539	3.22451	3.15075	4.1471	3.04343			0.120327	0.0794429	0.00568973	1.00203	-0.101637			0.919979	0.946423	0.996064	0.499296	1.07299
hsa-miR-7-5p	23.6455	23.5356	23.6376	23.8739	24.6731	23.7085		-9.02523	-8.96373	-9.03363	-9.11801	-8.14568	-9.20819			0.061502	-0.0083935	-0.0927805	0.879558	-0.182952			0.958266	1.00583	1.06642	0.543534	1.1352
hsa-miR-767-5p	31.5888	31.521	31.6125	31.9188	32.8469	31.7942		-1.08191	-0.97836	-1.05871	-1.07311	0.0281159	-1.12249			0.103552	0.0232057	0.00880367	1.11003	-0.0405753			0.930739	0.984044	0.993916	0.463285	1.02852
hsa-miR-874-3p	26.0017	25.9033	25.973	26.4191	27.0862	26.2624		-6.66908	-6.5961	-6.69822	-6.57279	-5.73258	-6.65422			0.0729855	-0.0291375	0.096292	0.936504	0.0148665			0.950669	1.0204	0.935434	0.522497	0.989748
hsa-miR-877-3p	31.846	31.7659	31.8551	32.1085	32.7185	32.0437		-0.8248	-0.733441	-0.816128	-0.883393	-0.100295	-0.872959			0.0913588	0.00867166	-0.0585935	0.724504	-0.0481593			0.938638	0.994007	1.04145	0.605205	1.03394
hsa-miR-885-5p	35.8627	35.8127	35.9259	36.3056	36.9627	36.1056		3.19198	3.31336	3.25467	3.3137	4.14396	3.18892			0.121376	0.0626915	0.12172	0.951977	-0.003061			0.919311	0.957476	0.919092	0.516924	1.00212
hsa-miR-887-3p	35.4279	35.3421	35.4405	35.8524	36.5789	35.6902		2.75711	2.84273	2.76922	2.86053	3.76009	2.77356			0.0856125	0.012102	0.103413	1.00298	0.016443			0.942384	0.991647	0.930828	0.498968	0.988667
hsa-miR-9-3p	27.3511	27.2596	27.3206	27.7727	28.7129	27.5799		-5.31967	-5.23981	-5.35067	-5.21921	-4.10589	-5.33675			0.07986	-0.030995	0.100468	1.21379	-0.0170745			0.946149	1.02172	0.932731	0.431136	1.01191
hsa-miR-941	27.0439	26.8416	27.0051	27.2289	27.9392	27.1624		-5.62684	-5.65781	-5.66613	-5.76298	-4.87961	-5.75429			-0.0309719	-0.0392874	-0.136143	0.747229	-0.127449			1.0217	1.02761	1.09896	0.595747	1.09236
hsa-miR-9-5p	22.6402	22.5426	22.6044	23.0111	23.7073	22.8366		-10.0305	-9.95676	-10.0669	-9.98083	-9.11151	-10.0801			0.073766	-0.036347	0.0496975	0.919016	-0.0495305			0.950154	1.02551	0.966139	0.52887	1.03493
hsa-miR-96-3p	30.714	30.4944	30.7844	31.067	32.1624	31.0721		-1.95675	-2.00497	-1.88687	-1.92487	-0.656359	-1.84456			-0.0482265	0.069881	0.0318815	1.30039	0.112183			1.03399	0.952717	0.978144	0.406017	0.925187
hsa-miR-96-5p	27.6929	27.4989	27.6996	27.9547	28.6255	27.8863		-4.97782	-5.00051	-4.97161	-5.03716	-4.19325	-5.03033			-0.022688	0.0062055	-0.0593395	0.784568	-0.052506			1.01585	0.995708	1.04199	0.580526	1.03706
hsa-miR-99a-3p	28.1908	28.0749	28.2009	28.4831	29.1141	28.3646		-4.47993	-4.42449	-4.47039	-4.50875	-3.70467	-4.55209			0.055447	0.009544	-0.0288185	0.775262	-0.0721565			0.962296	0.993406	1.02018	0.584283	1.05129
hsa-miR-99a-5p	20.5755	20.4547	20.5576	20.7991	21.4899	20.7258		-12.0953	-12.0447	-12.1136	-12.1928	-11.3289	-12.1909			0.050553	-0.018342	-0.097543	0.766363	-0.095623			0.965566	1.01279	1.06995	0.587898	1.06853
hsa-miR-99b-3p	25.3329	25.1087	25.3333	25.6027	26.1715	25.5505		-7.33786	-7.39065	-7.33794	-7.38917	-6.64726	-7.36615			-0.0527898	-7.92552e-05	-0.0513169	0.690599	-0.0282939			1.03727	1.00005	1.03621	0.619597	1.01981
U6 snRNA	32.6708	32.4994	32.6712	32.9919	32.8188	32.9167

## Sheet: Set 3
down-regulated miRNAs	Set 3
	Ct							delta Ct							delta delta Ct							fold
	un	un+P5 si	E27	E27+P5 si	E78	E78+P5 si		un	un+P5 si	E27	E27+P5 si	E78	E78+P5 si			un+P5 si	E27	E27+P5 si	E78	E78+P5 si			un+P5 si	E27	E27+P5 si	E78	E78+P5 si
hsa-let-7b-5p	21.606	21.7761	21.868	21.8922	23.6769	21.6376		-10.0652	-10.1087	-10.0745	-10.0245	-9.30774	-10.1406			-0.0434685	-0.00928767	0.040776	0.757494	-0.0753412			1.03059	1.00646	0.972132	0.591523	1.05361
hsa-let-7c-5p	22.3834	22.5738	22.6478	22.5953	24.6813	22.4186		-9.28786	-9.31102	-9.29474	-9.32135	-8.30341	-9.3596			-0.023162	-0.00687567	-0.0334855	0.984451	-0.0717438			1.01618	1.00478	1.02348	0.505418	1.05099
hsa-let-7e-3p	28.0234	28.2919	28.271	28.3316	30.4571	28.1359		-3.64789	-3.59293	-3.67147	-3.58509	-2.52752	-3.64224			0.054955	-0.0235816	0.0628017	1.12037	0.005644			0.962624	1.01648	0.957403	0.459976	0.996096
hsa-let-7g-5p	20.6569	20.9212	20.9229	20.9673	22.8127	20.7558		-11.0144	-10.9636	-11.0197	-10.9493	-10.172	-11.0224			0.0507448	-0.0053035	0.0650465	0.842366	-0.0080395			0.965438	1.00368	0.955915	0.557728	1.00559
hsa-let-7i-5p	25.9181	26.1395	26.1679	26.2279	27.8428	26.0234		-5.75312	-5.74538	-5.77463	-5.68877	-5.14184	-5.75475			0.00773833	-0.0215135	0.064348	0.611279	-0.00162983			0.994651	1.01502	0.956377	0.654616	1.00113
hsa-miR-101-3p	20.14	20.2809	20.367	20.3359	22.0593	20.2075		-11.5313	-11.6039	-11.5755	-11.5808	-10.9254	-11.5707			-0.0726728	-0.04423	-0.0495245	0.605859	-0.0394577			1.05166	1.03113	1.03492	0.65708	1.02773
hsa-miR-103a-3p	18.8336	18.969	19.043	19.0198	20.7095	18.9219		-12.8376	-12.9158	-12.8995	-12.8968	-12.2752	-12.8563			-0.078158	-0.0618967	-0.059193	0.562457	-0.0186923			1.05567	1.04384	1.04188	0.677148	1.01304
hsa-miR-106b-3p	24.1819	24.3119	24.3654	24.3871	26.0536	24.2439		-7.48938	-7.57294	-7.57715	-7.52961	-6.93102	-7.53431			-0.083561	-0.0877699	-0.0402285	0.558356	-0.0449338			1.05963	1.06273	1.02828	0.679076	1.03164
hsa-miR-106b-5p	18.8944	19.1288	19.1939	19.166	20.9236	18.9977		-12.7768	-12.756	-12.7486	-12.7506	-12.0611	-12.7805			0.0207665	0.0281632	0.0261785	0.715731	-0.00368133			0.985709	0.980668	0.982018	0.608897	1.00255
hsa-miR-10a-3p	34.8004	34.9095	34.976	34.9622	37.143	34.8375		3.12921	3.02467	3.0335	3.04553	4.15834	3.05928			-0.104534	-0.0957079	-0.0836792	1.02913	-0.0699267			1.07515	1.06859	1.05972	0.490005	1.04966
hsa-miR-10a-5p	30.4939	30.8088	30.8604	30.8064	32.8344	30.6239		-1.17731	-1.07609	-1.08207	-1.11025	-0.150305	-1.1543			0.101222	0.095236	0.067062	1.027	0.0230113			0.932243	0.936119	0.95458	0.490729	0.984176
hsa-miR-10b-5p	20.7479	20.922	21.0344	20.9556	22.7402	20.8426		-10.9233	-10.9628	-10.9081	-10.961	-10.2445	-10.9356			-0.0394763	0.015219	-0.037685	0.678863	-0.0122467			1.02774	0.989506	1.02647	0.624657	1.00852
hsa-miR-1179	32.8963	33.0286	33.0682	33.0636	34.8662	32.928		1.2251	1.14375	1.12573	1.1469	1.88156	1.14981			-0.0813444	-0.0993708	-0.0782009	0.656462	-0.0752885			1.058	1.07131	1.0557	0.634432	1.05357
hsa-miR-122-5p	31.6209	31.7589	31.8585	31.7835	33.5195	31.6552		-0.050313	-0.125958	-0.0839767	-0.133197	0.534828	-0.123018			-0.0756445	-0.0336637	-0.0828845	0.585141	-0.0727047			1.05383	1.02361	1.05913	0.666584	1.05169
hsa-miR-1243	33.2172	33.3993	33.4622	33.4069	35.1229	33.2853		1.54592	1.5145	1.51969	1.49024	2.13829	1.50712			-0.0314242	-0.0262332	-0.055679	0.592363	-0.0388004			1.02202	1.01835	1.03935	0.663255	1.02726
hsa-miR-1249	32.684	32.9285	32.9496	32.9754	35.4066	32.775		1.01275	1.04364	1.00704	1.05875	2.4219	0.996822			0.0308864	-0.00570748	0.0459999	1.40916	-0.0159272			0.978819	1.00396	0.968618	0.376532	1.0111
hsa-miR-125a-3p	27.795	27.9043	27.9688	27.9876	29.5798	27.8498		-3.87627	-3.98055	-3.97376	-3.92904	-3.40483	-3.92836			-0.104283	-0.0974925	-0.0527735	0.471433	-0.0520871			1.07496	1.06991	1.03726	0.721248	1.03676
hsa-miR-125b-5p	20.9631	21.0726	21.152	21.0908	22.9738	21.0441		-10.7081	-10.8122	-10.7905	-10.8259	-10.0109	-10.7341			-0.104074	-0.0823448	-0.117755	0.697283	-0.0259492			1.0748	1.05874	1.08504	0.616732	1.01815
hsa-miR-126-3p	20.3795	20.64	20.6929	20.6819	22.3736	20.5094		-11.2918	-11.2449	-11.2497	-11.2348	-10.6111	-11.2687			0.0468982	0.0420988	0.056973	0.680661	0.0230168			0.968015	0.971241	0.961279	0.623879	0.984173
hsa-miR-1269a	28.4833	28.6159	28.6613	28.759	30.5858	28.4776		-3.18794	-3.2689	-3.28122	-3.15771	-2.39887	-3.30059			-0.0809607	-0.0932821	0.030228	0.789076	-0.112651			1.05772	1.06679	0.979266	0.578715	1.08121
hsa-miR-1271-5p	27.7647	27.8788	27.9683	27.9493	29.6524	27.7776		-3.9065	-4.00607	-3.97422	-3.96737	-3.33228	-4.00054			-0.0995693	-0.0677151	-0.0608666	0.574221	-0.0940377			1.07145	1.04806	1.04309	0.671649	1.06735
hsa-miR-1296-5p	25.4623	25.6855	25.7485	25.6543	27.3267	25.607		-6.20896	-6.19939	-6.19404	-6.26239	-5.65797	-6.17122			0.00957144	0.0149221	-0.0534311	0.550984	0.0377379			0.993388	0.98971	1.03773	0.682555	0.974181
hsa-miR-132-3p	23.3146	23.4818	23.5918	23.5333	25.2432	23.3547		-8.35662	-8.40302	-8.35076	-8.38337	-7.74148	-8.42346			-0.046394	0.00585967	-0.0267445	0.615149	-0.0668395			1.03268	0.995947	1.01871	0.652862	1.04742
hsa-miR-132-5p	28.9127	29.0633	29.0756	29.1574	30.7043	28.9846		-2.75857	-2.82155	-2.86697	-2.75925	-2.28032	-2.79362			-0.0629761	-0.108391	-0.000675601	0.478255	-0.0350437			1.04462	1.07803	1.00047	0.717845	1.02459
hsa-miR-133b	29.1372	29.3496	29.419	29.417	31.0862	29.1973		-2.53401	-2.53528	-2.52351	-2.49963	-1.89841	-2.58088			-0.00126667	0.0105005	0.034383	0.635602	-0.0468667			1.00088	0.992748	0.976449	0.643672	1.03302
hsa-miR-135a-5p	27.0476	27.3286	27.3287	27.3435	29.2354	27.1782		-4.62362	-4.55621	-4.61386	-4.57321	-3.74925	-4.60001			0.0674068	0.00975467	0.0504145	0.874365	0.0236052			0.954352	0.993261	0.965659	0.545494	0.983771
hsa-miR-135b-5p	27.7487	27.9625	28.0318	28.0143	29.8205	27.8635		-3.92251	-3.92234	-3.91074	-3.90237	-3.1642	-3.91472			0.000172667	0.0117683	0.020144	0.758316	0.00779583			0.99988	0.991876	0.986134	0.591186	0.994611
hsa-miR-140-3p	22.7521	22.8881	22.9583	22.8786	24.7491	22.8397		-8.91919	-8.99677	-8.98425	-9.0381	-8.23558	-8.93847			-0.0775837	-0.0650638	-0.118906	0.683613	-0.019282			1.05525	1.04613	1.08591	0.622604	1.01345
hsa-miR-140-5p	24.1878	24.2294	24.2923	24.3784	25.9291	24.1722		-7.48345	-7.65545	-7.6502	-7.53828	-7.0556	-7.60601			-0.171998	-0.166742	-0.05483	0.427859	-0.122551			1.12662	1.12252	1.03874	0.743364	1.08866
hsa-miR-141-3p	25.6858	25.9062	25.9545	25.9276	27.8277	25.7953		-5.98546	-5.97868	-5.98797	-5.98905	-5.15696	-5.98289			0.006775	-0.00251917	-0.00359	0.828498	0.00256183			0.995315	1.00175	1.00249	0.563115	0.998226
hsa-miR-142-5p	34.1149	34.3584	34.3919	34.401	36.4272	34.2275		2.44363	2.47355	2.44935	2.48435	3.44256	2.44935			0.0299252	0.0057235	0.0407185	0.998928	0.00572			0.979471	0.996041	0.972171	0.500372	0.996043
hsa-miR-143-3p	29.6907	29.9905	30.0272	30.0004	32.2162	29.7618		-1.98058	-1.89436	-1.91529	-1.91626	-0.76851	-2.01639			0.0862167	0.0652852	0.064322	1.21207	-0.0358107			0.94199	0.955756	0.956395	0.431649	1.02513
hsa-miR-145-5p	28.2548	28.4606	28.5404	28.4555	30.15	28.39		-3.41641	-3.42426	-3.40208	-3.46112	-2.8347	-3.3882			-0.00785117	0.0143313	-0.044711	0.581708	0.0282047			1.00546	0.990115	1.03148	0.668172	0.98064
hsa-miR-146a-5p	30.5627	30.7457	30.7844	30.8167	32.5846	30.6533		-1.10852	-1.1391	-1.15811	-1.09997	-0.400101	-1.12487			-0.0305812	-0.0495945	0.008543	0.708417	-0.0163497			1.02142	1.03497	0.994096	0.611991	1.0114
hsa-miR-1471	35.1956	35.2852	35.3353	35.3146	37.1739	35.2175		3.5244	3.4004	3.39275	3.39795	4.18921	3.43933			-0.124001	-0.131649	-0.126452	0.66481	-0.085072			1.08975	1.09555	1.09161	0.630772	1.06074
hsa-miR-148b-3p	23.1052	23.2474	23.267	23.2931	25.0512	23.1978		-8.56605	-8.63745	-8.67552	-8.62354	-7.93341	-8.58038			-0.0714062	-0.109468	-0.0574925	0.632634	-0.0143342			1.05074	1.07883	1.04066	0.644998	1.00999
hsa-miR-148b-5p	29.8181	29.986	30.0895	29.9538	31.7741	29.9713		-1.85315	-1.89884	-1.853	-1.96285	-1.21056	-1.80688			-0.04569	0.000144584	-0.109703	0.642589	0.046268			1.03218	0.9999	1.07901	0.640563	0.968438
hsa-miR-150-5p	29.7554	29.9892	30.0151	29.9805	32.0293	29.8548		-1.91582	-1.89564	-1.92746	-1.93616	-0.955336	-1.92342			0.0201797	-0.0116375	-0.020339	0.960488	-0.00759983			0.98611	1.0081	1.0142	0.513883	1.00528
hsa-miR-153-3p	25.7384	25.9365	26.0427	25.9238	27.84	25.8445		-5.93285	-5.94834	-5.89983	-5.99282	-5.14465	-5.93364			-0.0154933	0.033021	-0.059965	0.7882	-0.000790167			1.0108	0.977372	1.04244	0.579066	1.00055
hsa-miR-16-1-3p	25.5929	25.7028	25.7554	25.8573	27.4012	25.5784		-6.07837	-6.18206	-6.1871	-6.0594	-5.58346	-6.19974			-0.103697	-0.108738	0.018968	0.494906	-0.121372			1.07452	1.07828	0.986938	0.709608	1.08777
hsa-miR-17-3p	23.2998	23.4845	23.5054	23.53	25.1084	23.3757		-8.37145	-8.40035	-8.43711	-8.38661	-7.87626	-8.40246			-0.0288999	-0.065661	-0.0151674	0.49519	-0.0310103			1.02023	1.04656	1.01057	0.709468	1.02173
hsa-miR-17-5p	15.6803	15.9425	15.9762	15.9161	17.8273	15.8135		-15.9909	-15.9423	-15.9663	-16.0006	-15.1574	-15.9647			0.0485548	0.024597	-0.0096635	0.833533	0.0261688			0.966904	0.983095	1.00672	0.561153	0.982025
hsa-miR-181a-3p	25.8927	25.9753	26.0954	26.0456	28.1356	25.8797		-5.77855	-5.90957	-5.84708	-5.87108	-4.84904	-5.89845			-0.131014	-0.0685227	-0.0925245	0.929513	-0.119895			1.09506	1.04864	1.06623	0.525035	1.08666
hsa-miR-181a-5p	21.5632	21.8351	21.887	21.7591	23.6481	21.7444		-10.108	-10.0497	-10.0556	-10.1576	-9.33653	-10.0338			0.05831	0.052457	-0.049551	0.771487	0.0741837			0.960388	0.964293	1.03494	0.585813	0.949879
hsa-miR-181c-3p	28.5839	28.7322	28.7704	28.84	30.5491	28.6572		-3.08732	-3.15268	-3.17208	-3.07669	-2.43554	-3.12099			-0.0653605	-0.0847556	0.0106314	0.651783	-0.0336686			1.04635	1.06051	0.992658	0.636493	1.02361
hsa-miR-182-5p	20.6167	20.8223	20.8793	20.7649	22.4362	20.7717		-11.0546	-11.0625	-11.0633	-11.1518	-10.5485	-11.0065			-0.007945	-0.00868233	-0.0971865	0.506073	0.0480755			1.00552	1.00604	1.06969	0.704137	0.967226
hsa-miR-183-5p	20.6167	20.8223	20.8793	20.7649	22.4362	20.7717		-11.0546	-11.0625	-11.0633	-11.1518	-10.5485	-11.0065			-0.007945	-0.00868233	-0.0971865	0.506073	0.0480755			1.00552	1.00604	1.06969	0.704137	0.967226
hsa-miR-186-5p	21.3787	21.6346	21.6952	21.538	23.4264	21.5389		-10.2926	-10.2502	-10.2473	-10.3787	-9.55823	-10.2393			0.0423432	0.0452172	-0.0861195	0.73433	0.0532912			0.971076	0.969144	1.06151	0.601097	0.963735
hsa-miR-187-3p	25.854	25.9907	26.1123	25.9691	27.953	25.9363		-5.81729	-5.89417	-5.83024	-5.94752	-5.0317	-5.84185			-0.0768845	-0.0129515	-0.130234	0.785588	-0.0245623			1.05474	1.00902	1.09447	0.580115	1.01717
hsa-miR-188-3p	31.4721	31.7112	31.7733	31.7373	33.4822	31.5656		-0.199191	-0.173634	-0.169243	-0.179329	0.497508	-0.212635			0.025557	0.0299481	0.0198616	0.696699	-0.0134445			0.982441	0.979456	0.986327	0.616982	1.00936
hsa-miR-18a-5p	19.1422	19.4016	19.4672	19.3465	21.1786	19.3163		-12.5291	-12.4833	-12.4753	-12.5702	-11.8061	-12.4619			0.045779	0.053784	-0.0410935	0.722999	0.0671307			0.968767	0.963406	1.02889	0.605837	0.954535
hsa-miR-18b-5p	18.5511	18.7657	18.822	18.7865	20.5355	18.6653		-13.1201	-13.1191	-13.1205	-13.1302	-12.4492	-13.1129			0.00101033	-0.000405167	-0.010064	0.670927	0.0072535			0.9993	1.00028	1.007	0.628103	0.994985
hsa-miR-190a-5p	26.4358	26.5984	26.6966	26.6187	28.5769	26.5529		-5.23549	-5.28643	-5.2459	-5.29794	-4.40778	-5.22526			-0.0509398	-0.0104108	-0.062451	0.827706	0.0102333			1.03594	1.00724	1.04424	0.563424	0.992932
hsa-miR-191-3p	28.8009	28.8582	28.916	28.9745	30.6859	28.8032		-2.87031	-3.02664	-3.02653	-2.94212	-2.29874	-2.97502			-0.156332	-0.156219	-0.0718102	0.571567	-0.104705			1.11445	1.11436	1.05103	0.672885	1.07527
hsa-miR-193b-3p	21.3501	21.6077	21.6016	21.5828	23.3821	21.479		-10.3211	-10.2771	-10.3409	-10.3338	-9.60261	-10.2992			0.0440325	-0.0197935	-0.012678	0.718539	0.0219592			0.96994	1.01381	1.00883	0.607713	0.984894
hsa-miR-194-5p	24.7661	24.7927	24.9581	24.8707	26.7806	24.759		-6.90519	-7.09215	-6.98444	-7.04597	-6.20407	-7.01919			-0.186968	-0.0792507	-0.140783	0.701117	-0.114009			1.13837	1.05647	1.1025	0.615096	1.08223
hsa-miR-195-5p	22.3411	22.5758	22.6407	22.598	24.5467	22.4047		-9.33017	-9.30907	-9.30186	-9.31862	-8.43792	-9.3735			0.0210983	0.0283085	0.0115565	0.892253	-0.0433225			0.985482	0.980569	0.992022	0.538772	1.03048
hsa-miR-196a-5p	19.558	19.6842	19.7067	19.6899	21.3649	19.6361		-12.1132	-12.2007	-12.2358	-12.2268	-11.6198	-12.1421			-0.0874498	-0.122572	-0.113555	0.493414	-0.0288898			1.06249	1.08867	1.08189	0.710342	1.02023
hsa-miR-196b-3p	27.7832	27.9622	27.9766	28.0225	29.7002	27.8248		-3.88804	-3.92261	-3.96588	-3.89415	-3.28451	-3.95341			-0.0345695	-0.0778428	-0.00611078	0.603532	-0.0653717			1.02425	1.05544	1.00424	0.658141	1.04635
hsa-miR-196b-5p	19.0195	19.2746	19.3307	19.2637	21.0805	19.1852		-12.6518	-12.6102	-12.6118	-12.6529	-11.9042	-12.593			0.041536	0.039985	-0.0011715	0.747549	0.0587728			0.97162	0.972665	1.00081	0.595615	0.96008
hsa-miR-199b-5p	34.3528	34.4457	34.5288	34.4798	36.184	34.3583		2.68155	2.56085	2.58626	2.56316	3.19936	2.58008			-0.120703	-0.0952903	-0.118385	0.517813	-0.10147			1.08726	1.06828	1.08552	0.69843	1.07287
hsa-miR-19a-3p	14.3102	14.4624	14.5288	14.4251	16.0438	14.4605		-17.3611	-17.4224	-17.4138	-17.4916	-16.9409	-17.3176			-0.0613399	-0.052706	-0.130535	0.420189	0.043413			1.04343	1.03721	1.0947	0.747327	0.970357
hsa-miR-19b-1-5p	25.8875	26.0981	26.1192	26.1177	27.9486	25.9767		-5.78377	-5.7867	-5.82327	-5.79895	-5.03609	-5.80149			-0.00292506	-0.0395021	-0.0151755	0.747677	-0.0177182			1.00203	1.02776	1.01057	0.595562	1.01236
hsa-miR-200a-3p	30.2734	30.4192	30.5027	30.4178	32.5271	30.3856		-1.39788	-1.46564	-1.4398	-1.49889	-0.457599	-1.39262			-0.067754	-0.0419143	-0.101009	0.940283	0.00526717			1.04808	1.02948	1.07252	0.52113	0.996356
hsa-miR-205-5p	27.5463	27.742	27.8062	27.7115	29.5493	27.633		-4.12496	-4.1428	-4.13633	-4.20519	-3.43537	-4.14516			-0.0178447	-0.011376	-0.08023	0.689587	-0.0202048			1.01245	1.00792	1.05719	0.620031	1.0141
hsa-miR-20a-3p	23.0275	23.1706	23.2612	23.228	25.0242	23.0537		-8.64373	-8.71422	-8.68131	-8.68862	-7.96045	-8.72447			-0.0704908	-0.0375788	-0.0448885	0.683279	-0.0807397			1.05007	1.02639	1.0316	0.622748	1.05756
hsa-miR-20a-5p	15.5235	15.7657	15.7971	15.8214	17.746	15.58		-16.1477	-16.1191	-16.1454	-16.0953	-15.2387	-16.1981			0.0286118	0.00230933	0.05245	0.90906	-0.0504107			0.980363	0.998401	0.964297	0.532532	1.03556
hsa-miR-210-3p	23.4649	23.6467	23.6755	23.6714	25.3306	23.5377		-8.20635	-8.23811	-8.26706	-8.2453	-7.65407	-8.24049			-0.0317583	-0.0607118	-0.038948	0.552283	-0.0341375			1.02226	1.04298	1.02736	0.68194	1.02394
hsa-miR-212-5p	29.0043	29.1094	29.1427	29.2049	30.7961	29.0718		-2.66694	-2.77545	-2.79981	-2.7118	-2.18857	-2.70641			-0.108513	-0.132866	-0.0448586	0.478373	-0.0394721			1.07812	1.09647	1.03158	0.717787	1.02774
hsa-miR-214-3p	32.7586	32.8837	32.9722	32.8779	34.8708	32.8335		1.08737	0.998847	1.02965	0.961265	1.88609	1.05533			-0.0885268	-0.0577223	-0.126109	0.798715	-0.0320442			1.06328	1.04082	1.09135	0.574861	1.02246
hsa-miR-21-5p	18.3141	18.4353	18.5439	18.4683	20.4436	18.3778		-13.3571	-13.4495	-13.3986	-13.4484	-12.541	-13.4004			-0.0923732	-0.0414985	-0.091253	0.816072	-0.0432837			1.06612	1.02918	1.0653	0.567986	1.03046
hsa-miR-216a-5p	34.3658	34.5779	34.6204	34.5416	36.4168	34.529		2.69452	2.69311	2.67784	2.62494	3.43214	2.75079			-0.00141683	-0.0166835	-0.0695875	0.737619	0.0562645			1.00098	1.01163	1.04942	0.599728	0.961751
hsa-miR-216b-5p	32.4035	32.5618	32.6386	32.5291	34.4699	32.537		0.732229	0.677003	0.696112	0.612454	1.48528	0.758805			-0.0552258	-0.0361165	-0.119775	0.753047	0.0265762			1.03902	1.02535	1.08657	0.593349	0.981747
hsa-miR-219a-1-3p	33.744	33.8543	33.9003	33.9254	35.7895	33.7549		2.07278	1.96951	1.95783	2.00874	2.80479	1.97673			-0.103275	-0.114956	-0.0640392	0.732008	-0.0960556			1.07421	1.08294	1.04539	0.602065	1.06885
hsa-miR-219a-5p	24.1091	24.2681	24.3458	24.3416	26.0331	24.1497		-7.56214	-7.61672	-7.5967	-7.5751	-6.95159	-7.62847			-0.0545792	-0.0345663	-0.012966	0.61055	-0.0663307			1.03856	1.02425	1.00903	0.654947	1.04705
hsa-miR-22-3p	26.9706	27.2208	27.2717	27.1636	28.8298	27.1411		-4.70062	-4.66408	-4.67078	-4.7531	-4.15482	-4.63713			0.0365417	0.0298468	-0.052476	0.545801	0.0634958			0.974989	0.979524	1.03704	0.685011	0.956943
hsa-miR-224-3p	26.6167	26.6864	26.8154	26.7454	28.4546	26.6232		-5.05453	-5.19843	-5.12714	-5.17128	-4.53007	-5.15496			-0.143902	-0.0726184	-0.116756	0.524454	-0.100431			1.10489	1.05162	1.08429	0.695222	1.07209
hsa-miR-224-5p	28.2042	28.368	28.4373	28.4078	30.2022	28.3184		-3.46706	-3.51684	-3.50521	-3.50882	-2.78242	-3.45978			-0.049785	-0.0381553	-0.0417585	0.684638	0.00728233			1.03511	1.0268	1.02937	0.622162	0.994965
hsa-miR-22-5p	29.6984	29.829	29.8941	29.97	31.7674	29.6753		-1.97287	-2.05584	-2.04844	-1.94664	-1.21728	-2.10289			-0.0829678	-0.0755675	0.0262365	0.755594	-0.130014			1.05919	1.05378	0.981979	0.592303	1.0943
hsa-miR-23b-3p	18.9717	19.1663	19.2032	19.224	20.9573	19.0521		-12.6995	-12.7185	-12.7393	-12.6927	-12.0273	-12.7261			-0.018998	-0.0397892	0.006818	0.672175	-0.026635			1.01326	1.02796	0.995285	0.62756	1.01863
hsa-miR-23b-5p	30.7006	30.9577	30.9325	30.9955	32.9418	30.7742		-0.970625	-0.927171	-1.00998	-0.921121	-0.0429035	-1.00403			0.0434543	-0.0393586	0.0495045	0.927722	-0.0334077			0.970329	1.02766	0.966268	0.525688	1.02343
hsa-miR-24-1-5p	27.9012	28.111	28.2101	28.1549	29.994	27.9597		-3.77007	-3.77384	-3.73244	-3.76176	-2.99062	-3.81852			-0.00376366	0.0376317	0.00831259	0.779456	-0.0484445			1.00261	0.974253	0.994255	0.582586	1.03415
hsa-miR-25-5p	29.9902	30.1556	30.2412	30.1937	32.1403	30.0072		-1.68105	-1.72923	-1.70127	-1.72294	-0.844337	-1.77095			-0.0481771	-0.0202219	-0.0418925	0.836714	-0.0898937			1.03396	1.01412	1.02946	0.559917	1.06429
hsa-miR-26a-5p	18.0473	18.1599	18.2315	18.2744	19.9496	18.0349		-13.6239	-13.7249	-13.7111	-13.6423	-13.035	-13.7433			-0.101014	-0.0871317	-0.018368	0.588898	-0.119399			1.07253	1.06226	1.01281	0.66485	1.08628
hsa-miR-26b-3p	29.9866	30.2193	30.2601	30.2088	31.9503	30.1419		-1.6846	-1.66553	-1.68242	-1.70787	-1.03439	-1.63631			0.0190752	0.00218805	-0.023267	0.650215	0.0482909			0.986865	0.998485	1.01626	0.637185	0.967081
hsa-miR-27a-3p	17.3837	17.6011	17.6382	17.6073	19.3534	17.4785		-14.2875	-14.2837	-14.3043	-14.3094	-13.6313	-14.2997			0.003811	-0.0167952	-0.021883	0.656217	-0.0122255			0.997362	1.01171	1.01528	0.63454	1.00851
hsa-miR-28-3p	24.0836	24.378	24.4339	24.3725	26.169	24.2619		-7.58769	-7.50683	-7.50863	-7.54414	-6.8157	-7.5163			0.080861	0.0790608	0.0435518	0.771994	0.0713887			0.945493	0.946674	0.970263	0.585608	0.951721
hsa-miR-299-5p	33.264	33.4576	33.5148	33.3912	35.9756	33.3932		1.59278	1.57272	1.57227	1.47456	2.99095	1.61499			-0.02006	-0.020516	-0.118221	1.39816	0.0222088			1.014	1.01432	1.0854	0.379412	0.984724
hsa-miR-29b-3p	26.5081	26.7232	26.7753	26.6925	28.5547	26.664		-5.16309	-5.16164	-5.16722	-5.22417	-4.42993	-5.11416			0.00145483	-0.00412517	-0.061073	0.733166	0.0489312			0.998992	1.00286	1.04324	0.601582	0.966652
hsa-miR-29c-3p	23.0342	23.1831	23.27	23.2662	25.2065	23.0473		-8.63705	-8.70174	-8.67248	-8.65042	-7.77812	-8.73094			-0.064691	-0.0354278	-0.013368	0.858935	-0.0938867			1.04586	1.02486	1.00931	0.551359	1.06724
hsa-miR-301b	22.9442	23.1145	23.1901	23.1193	24.8851	23.0166		-8.72708	-8.77033	-8.75237	-8.79736	-8.09958	-8.76159			-0.0432533	-0.0252918	-0.0702835	0.627497	-0.034514			1.03043	1.01769	1.04992	0.647298	1.02421
hsa-miR-30b-5p	20.5766	20.7526	20.7789	20.8012	22.6191	20.6047		-11.0946	-11.1323	-11.1636	-11.1155	-10.3655	-11.1734			-0.0376342	-0.0689842	-0.020845	0.72911	-0.0787933			1.02643	1.04898	1.01455	0.603276	1.05613
hsa-miR-30d-5p	19.4591	19.7286	19.7457	19.7299	21.4166	19.5876		-12.2121	-12.1562	-12.1968	-12.1868	-11.5681	-12.1906			0.0558943	0.0153207	0.0253375	0.644035	0.0215047			0.961998	0.989437	0.982591	0.639921	0.985205
hsa-miR-30e-3p	21.1334	21.3624	21.428	21.3721	23.2719	21.2884		-10.5378	-10.5224	-10.5145	-10.5445	-9.71272	-10.4898			0.0153588	0.0232678	-0.0067555	0.825077	0.047957			0.989411	0.984001	1.00469	0.564452	0.967305
hsa-miR-31-3p	22.5296	22.765	22.7876	22.8552	24.8573	22.5617		-9.1416	-9.11986	-9.15496	-9.0615	-8.12733	-9.21645			0.0217482	-0.0133528	0.080105	1.01428	-0.0748437			0.985038	1.0093	0.945989	0.495077	1.05325
hsa-miR-31-5p	21.7851	21.9637	22.046	21.9421	23.649	21.8778		-9.88611	-9.92111	-9.89649	-9.9746	-9.33562	-9.90043			-0.0350035	-0.010379	-0.0884965	0.550491	-0.014319			1.02456	1.00722	1.06326	0.682788	1.00997
hsa-miR-324-3p	22.8579	23.0086	23.1425	22.9832	24.712	22.9451		-8.81337	-8.87625	-8.79999	-8.93345	-8.27265	-8.83308			-0.062876	0.0133862	-0.120083	0.540718	-0.0197068			1.04455	0.990764	1.0868	0.687429	1.01375
hsa-miR-324-5p	21.9924	22.2496	22.3155	22.212	23.82	22.1639		-9.67886	-9.63522	-9.62698	-9.70462	-9.16462	-9.61427			0.0436387	0.0518767	-0.025757	0.514245	0.0645868			0.970205	0.964681	1.01801	0.700159	0.956219
hsa-miR-32-5p	24.0773	24.3131	24.3934	24.3446	26.1173	24.1593		-7.59391	-7.57172	-7.54916	-7.57205	-6.86739	-7.61892			0.0221927	0.0447503	0.021867	0.72652	-0.0250033			0.984735	0.969458	0.984957	0.60436	1.01748
hsa-miR-326	27.8246	27.9359	27.9887	28.0081	30.0747	27.8983		-3.84667	-3.94891	-3.95387	-3.90858	-2.90996	-3.87992			-0.102236	-0.107194	-0.0619095	0.936718	-0.033243			1.07344	1.07713	1.04385	0.52242	1.02331
hsa-miR-331-3p	22.7995	22.9295	23.015	22.9811	24.8044	22.87		-8.87174	-8.95536	-8.92755	-8.93555	-8.18025	-8.9082			-0.0836263	-0.0558118	-0.0638125	0.691491	-0.0364655			1.05968	1.03944	1.04522	0.619213	1.0256
hsa-miR-338-3p	27.8375	28.141	28.1653	28.0912	29.8857	28.0185		-3.83373	-3.74382	-3.77719	-3.8255	-3.09893	-3.75967			0.0899113	0.0565395	0.008235	0.734801	0.0740618			0.93958	0.961568	0.994308	0.600901	0.94996
hsa-miR-339-3p	24.0304	24.1671	24.2136	24.1824	25.8397	24.108		-7.64085	-7.71773	-7.72894	-7.73423	-7.14498	-7.67019			-0.076877	-0.0880849	-0.0933739	0.495872	-0.0293346			1.05473	1.06296	1.06686	0.709133	1.02054
hsa-miR-33a-5p	27.4904	27.7699	27.7897	27.7345	29.6897	27.6624		-4.18088	-4.11494	-4.15281	-4.18218	-3.29497	-4.11581			0.0659463	0.0280767	-0.001293	0.885916	0.0650768			0.955318	0.980727	1.0009	0.541144	0.955894
hsa-miR-340-3p	26.2541	26.3818	26.4415	26.4002	28.1304	26.335		-5.41717	-5.50307	-5.501	-5.51647	-4.85424	-5.44322			-0.0858945	-0.0838276	-0.0992993	0.562935	-0.0260427			1.06135	1.05983	1.07125	0.676924	1.01822
hsa-miR-340-5p	22.9517	23.2091	23.2509	23.2212	25.0493	23.0814		-8.71951	-8.67572	-8.69166	-8.6955	-7.93537	-8.69681			0.0437872	0.0278447	0.024013	0.784136	0.0226967			0.970105	0.980885	0.983493	0.5807	0.984391
hsa-miR-34a-3p	24.3021	24.4055	24.5142	24.4477	26.0512	24.3479		-7.36915	-7.47929	-7.42831	-7.46895	-6.93343	-7.43026			-0.110143	-0.0591628	-0.0998045	0.435718	-0.0611085			1.07934	1.04186	1.07163	0.739326	1.04327
hsa-miR-34a-5p	22.0577	22.2185	22.3023	22.2619	24.1068	22.1629		-9.61352	-9.66633	-9.64018	-9.65479	-8.87786	-9.61526			-0.0528043	-0.0266612	-0.041273	0.735661	-0.00173967			1.03728	1.01865	1.02902	0.600543	1.00121
hsa-miR-34c-3p	26.0933	26.2988	26.3981	26.2961	27.9902	26.199		-5.57791	-5.58602	-5.54437	-5.62052	-4.99443	-5.57918			-0.00810583	0.0335367	-0.042613	0.583483	-0.001269			1.00563	0.977022	1.02998	0.66735	1.00088
hsa-miR-34c-5p	25.3105	25.6014	25.628	25.5307	27.5439	25.4842		-6.36076	-6.28346	-6.31457	-6.38594	-5.44072	-6.294			0.077297	0.0461955	-0.025182	0.920039	0.0667597			0.947832	0.968487	1.01761	0.528495	0.95478
hsa-miR-361-5p	20.3264	20.4977	20.575	20.5008	22.2898	20.4232		-11.3448	-11.3871	-11.3675	-11.4158	-10.6948	-11.355			-0.0423072	-0.0226885	-0.0710235	0.649978	-0.0102238			1.02976	1.01585	1.05046	0.63729	1.00711
hsa-miR-362-5p	27.1758	27.3389	27.433	27.3552	29.2068	27.2348		-4.49548	-4.54596	-4.50955	-4.56144	-3.77786	-4.54334			-0.0504818	-0.0140757	-0.065964	0.717616	-0.0478612			1.03561	1.0098	1.04678	0.608102	1.03373
hsa-miR-365a-3p	22.5306	22.7131	22.7268	22.7447	24.6599	22.5809		-9.14067	-9.17169	-9.21568	-9.17196	-8.32478	-9.19728			-0.0310157	-0.0750032	-0.031288	0.81589	-0.0566008			1.02173	1.05336	1.02192	0.568058	1.04001
hsa-miR-373-3p	33.4162	33.6305	33.671	33.6547	35.7623	33.5176		1.74493	1.74565	1.72847	1.73804	2.7776	1.73946			0.000721833	-0.016462	-0.006889	1.03267	-0.00546867			0.9995	1.01148	1.00479	0.488804	1.0038
hsa-miR-373-5p	30.8084	31.0467	31.0784	31.0619	33.0336	30.9271		-0.862855	-0.838177	-0.864161	-0.85472	0.0489343	-0.851106			0.0246777	-0.00130567	0.0081345	0.911789	0.0117493			0.98304	1.00091	0.994377	0.531525	0.991889
hsa-miR-374a-5p	20.0179	20.2974	20.3363	20.3089	22.0774	20.1487		-11.6534	-11.5875	-11.6063	-11.6078	-10.9072	-11.6295			0.0658973	0.047111	0.0455705	0.746147	0.0238515			0.955351	0.967873	0.968907	0.596194	0.983603
hsa-miR-374b-3p	26.8671	27.07	27.1052	27.1022	28.9452	26.9582		-4.80411	-4.81488	-4.83734	-4.8145	-4.03947	-4.81994			-0.0107687	-0.0332272	-0.0103885	0.764644	-0.0158295			1.00749	1.0233	1.00723	0.588599	1.01103
hsa-miR-378a-5p	28.1609	28.2533	28.305	28.3257	30.0642	28.2077		-3.51037	-3.63158	-3.63756	-3.591	-2.92044	-3.57052			-0.121208	-0.127188	-0.0806299	0.589929	-0.0601439			1.08765	1.09216	1.05748	0.664376	1.04257
hsa-miR-421	23.779	23.9731	24.054	24.0786	25.7136	23.835		-7.89228	-7.91174	-7.88848	-7.83811	-7.27102	-7.94321			-0.0194622	0.0037945	0.054169	0.621252	-0.0509295			1.01358	0.997373	0.963149	0.650107	1.03593
hsa-miR-424-5p	23.2836	23.4491	23.5344	23.4067	25.1991	23.4437		-8.38764	-8.43573	-8.4081	-8.50999	-7.7856	-8.33445			-0.0480888	-0.0204643	-0.12235	0.602038	0.0531868			1.03389	1.01429	1.08851	0.658823	0.963805
hsa-miR-425-3p	25.7146	25.9473	25.9914	25.9776	27.7488	25.8103		-5.95662	-5.93751	-5.95116	-5.93903	-5.23588	-5.96792			0.0191138	0.00546067	0.017593	0.720736	-0.0113			0.986839	0.996222	0.98788	0.606788	1.00786
hsa-miR-429	28.8823	29.0256	29.0871	29.0435	30.8081	28.9655		-2.78891	-2.85926	-2.85544	-2.87313	-2.17652	-2.81265			-0.0703495	-0.066535	-0.0842245	0.612387	-0.0237452			1.04997	1.0472	1.06012	0.654114	1.0166
hsa-miR-450a-5p	24.4005	24.523	24.6011	24.5532	26.5358	24.4945		-7.27075	-7.36182	-7.34141	-7.36345	-6.44887	-7.28368			-0.0910677	-0.0706597	-0.0926995	0.821879	-0.0129327			1.06516	1.0502	1.06636	0.565704	1.009
hsa-miR-451a	30.3304	30.5951	30.6175	30.5727	32.5364	30.4637		-1.34085	-1.28978	-1.32505	-1.34398	-0.448248	-1.3145			0.0510635	0.0157925	-0.0031375	0.892598	0.026344			0.965225	0.989113	1.00218	0.538643	0.981905
hsa-miR-452-5p	23.6134	23.8622	23.9246	23.9174	25.9543	23.6697		-8.05784	-8.02269	-8.01787	-7.99928	-7.0304	-8.10847			0.0351523	0.0399673	0.0585625	1.02744	-0.05063			0.975929	0.972677	0.96022	0.49058	1.03572
hsa-miR-454-3p	20.748	20.9438	21.033	20.9001	22.6912	20.849		-10.9232	-10.941	-10.9095	-11.0166	-10.2935	-10.9292			-0.0177618	0.0137228	-0.093318	0.629754	-0.0059895			1.01239	0.990533	1.06682	0.646287	1.00416
hsa-miR-455-3p	23.9966	24.0978	24.1733	24.1917	25.9203	24.0171		-7.67464	-7.78705	-7.76927	-7.72495	-7.06434	-7.7611			-0.112412	-0.0946288	-0.050314	0.610296	-0.0864606			1.08103	1.06779	1.03549	0.655062	1.06176
hsa-miR-455-5p	27.3222	27.5235	27.6076	27.5801	29.1765	27.386		-4.34904	-4.36131	-4.33495	-4.33654	-3.80816	-4.39219			-0.0122693	0.0140838	0.0124965	0.540877	-0.0431517			1.00854	0.990285	0.991375	0.687353	1.03036
hsa-miR-483-3p	30.574	30.8164	30.8708	30.8122	32.9332	30.7019		-1.09725	-1.06842	-1.07171	-1.10442	-0.0514377	-1.07627			0.0288303	0.0255317	-0.007177	1.04581	0.0209792			0.980215	0.982458	1.00499	0.484373	0.985564
hsa-miR-485-3p	29.8632	30.0651	30.1166	30.1096	31.9467	29.9762		-1.80801	-1.81974	-1.82589	-1.80708	-1.03798	-1.80201			-0.0117302	-0.0178772	0.0009305	0.77003	0.00600383			1.00816	1.01247	0.999355	0.586405	0.995847
hsa-miR-489-3p	29.0925	29.3251	29.3779	29.32	31.1145	29.195		-2.57876	-2.55973	-2.56459	-2.5967	-1.87019	-2.58316			0.0190273	0.0141668	-0.0179411	0.70857	-0.00440806			0.986898	0.990228	1.01251	0.611926	1.00306
hsa-miR-491-3p	27.2837	27.5531	27.5624	27.5455	29.4863	27.4265		-4.38751	-4.33174	-4.38016	-4.37114	-3.49836	-4.35167			0.0557708	0.00735617	0.0163755	0.889156	0.0358442			0.96208	0.994914	0.988714	0.53993	0.975461
hsa-miR-497-5p	30.1209	30.2798	30.3228	30.306	31.9798	30.237		-1.55034	-1.60499	-1.61973	-1.61063	-1.00484	-1.54121			-0.0546478	-0.0693922	-0.0602875	0.545503	0.009135			1.03861	1.04927	1.04267	0.685152	0.993688
hsa-miR-500a-5p	23.1552	23.4367	23.461	23.389	25.3201	23.2919		-8.51602	-8.44816	-8.48149	-8.52766	-7.66455	-8.48634			0.0678582	0.0345325	-0.0116385	0.851472	0.0296843			0.954053	0.976348	1.0081	0.554219	0.979635
hsa-miR-501-3p	26.4892	26.6237	26.7092	26.6575	28.6969	26.5673		-5.18203	-5.26117	-5.23333	-5.25915	-4.28774	-5.21086			-0.0791366	-0.0513013	-0.0771147	0.894294	-0.0288277			1.05639	1.0362	1.05491	0.538011	1.02018
hsa-miR-501-5p	24.1465	24.3765	24.4018	24.3879	26.1171	24.265		-7.52473	-7.5083	-7.54069	-7.52878	-6.86757	-7.5132			0.016433	-0.015957	-0.004051	0.657155	0.0115285			0.988674	1.01112	1.00281	0.634128	0.992041
hsa-miR-502-5p	25.021	25.2738	25.3269	25.2146	27.236	25.1977		-6.65028	-6.61101	-6.61562	-6.70204	-5.74868	-6.58044			0.0392705	0.0346572	-0.051755	0.901597	0.0698385			0.973147	0.976264	1.03653	0.535294	0.952745
hsa-miR-503-5p	27.1913	27.3521	27.4365	27.3679	29.1823	27.2919		-4.4799	-4.53275	-4.506	-4.54873	-3.80235	-4.48633			-0.0528417	-0.0260968	-0.068824	0.677551	-0.0064255			1.03731	1.01825	1.04886	0.625226	1.00446
hsa-miR-504-5p	35.1341	35.293	35.3603	35.3126	37.3143	35.1806		3.46288	3.40821	3.41777	3.39595	4.32965	3.40246			-0.0546697	-0.0451114	-0.0669247	0.866775	-0.0604186			1.03862	1.03176	1.04748	0.548371	1.04277
hsa-miR-509-3p	32.5986	32.8481	32.8845	32.8528	34.706	32.7064		0.927365	0.963227	0.942024	0.936115	1.72134	0.928237			0.0358623	0.0146588	0.00875	0.793979	0.000871667			0.975449	0.989891	0.993953	0.576751	0.999396
hsa-miR-518c-5p	33.0993	33.3229	33.4076	33.2739	35.2271	33.2518		1.42801	1.43805	1.46512	1.35724	2.24241	1.47366			0.010043	0.0371113	-0.070768	0.814394	0.0456457			0.993063	0.974604	1.05028	0.568647	0.968856
hsa-miR-518e-5p	32.7292	32.8125	32.8792	32.8792	34.9367	32.7459		1.05795	0.927682	0.93667	0.962525	1.95204	0.967668			-0.130265	-0.121277	-0.095422	0.894089	-0.0902795			1.09449	1.0877	1.06838	0.538087	1.06458
hsa-miR-520c-3p	31.1055	31.3286	31.3574	31.3214	33.303	31.2246		-0.565753	-0.556252	-0.585146	-0.595266	0.318296	-0.553556			0.00950117	-0.019393	-0.0295135	0.884049	0.0121973			0.993436	1.01353	1.02067	0.541845	0.991581
hsa-miR-532-3p	23.9464	24.0409	24.1388	24.1231	25.7906	23.9706		-7.72482	-7.84389	-7.80369	-7.79356	-7.19404	-7.80758			-0.119077	-0.0788708	-0.0687452	0.530781	-0.0827606			1.08604	1.05619	1.0488	0.69218	1.05904
hsa-miR-542-5p	27.6847	27.9469	27.9861	27.9339	29.6001	27.8326		-3.98659	-3.93791	-3.95646	-3.9828	-3.38456	-3.94563			0.0486715	0.0301235	0.0037875	0.602025	0.0409527			0.966826	0.979336	0.997378	0.658828	0.972013
hsa-miR-545-3p	28.7856	28.9681	29.0478	28.9558	30.753	28.9174		-2.88565	-2.91677	-2.89472	-2.96084	-2.23165	-2.86074			-0.0311172	-0.00906367	-0.075188	0.654006	0.024912			1.0218	1.0063	1.0535	0.635513	0.982881
hsa-miR-548a-3p	28.0354	28.1686	28.2574	28.2259	30.0278	28.1016		-3.63586	-3.71625	-3.68515	-3.69079	-2.95686	-3.67656			-0.0803884	-0.0492811	-0.0549294	0.679004	-0.0406933			1.0573	1.03475	1.03881	0.624597	1.02861
hsa-miR-548k	28.4376	28.644	28.6902	28.6572	30.473	28.5461		-3.23366	-3.24088	-3.25236	-3.25942	-2.51167	-3.23214			-0.00722213	-0.0187029	-0.0257639	0.721985	0.00152405			1.00502	1.01305	1.01802	0.606263	0.998944
hsa-miR-550a-3p	26.9525	27.1059	27.1763	27.1378	29.0035	26.977		-4.71879	-4.7789	-4.76618	-4.77885	-3.98112	-4.80118			-0.0601171	-0.0473949	-0.0600634	0.737672	-0.082396			1.04255	1.0334	1.04251	0.599706	1.05878
hsa-miR-550a-5p	27.6555	27.775	27.8606	27.7983	29.7859	27.681		-4.01572	-4.10981	-4.08191	-4.1184	-3.19878	-4.09715			-0.094084	-0.0661903	-0.10268	0.816943	-0.081423			1.06739	1.04695	1.07377	0.567643	1.05806
hsa-miR-556-3p	27.639	27.7077	27.8075	27.7871	29.5039	27.6531		-4.03226	-4.17715	-4.13504	-4.12954	-3.48077	-4.12508			-0.144885	-0.102781	-0.0972758	0.551488	-0.0928226			1.10564	1.07384	1.06975	0.682316	1.06645
hsa-miR-556-5p	32.7576	32.9196	32.967	32.9848	34.7569	32.7829		1.08634	1.03474	1.02445	1.06811	1.77223	1.00475			-0.0515942	-0.0618864	-0.0182224	0.685895	-0.0815828			1.03641	1.04383	1.01271	0.62162	1.05818
hsa-miR-561-3p	33.2076	33.3543	33.3774	33.4362	35.2243	33.227		1.53634	1.46945	1.43483	1.51952	2.23963	1.44883			-0.0668905	-0.101506	-0.0168202	0.703285	-0.0875074			1.04746	1.07289	1.01173	0.614172	1.06253
hsa-miR-572	28.3038	28.5914	28.6418	28.5537	30.5925	28.4532		-3.36741	-3.29346	-3.30068	-3.36299	-2.39221	-3.32501			0.0739548	0.0667315	0.004419	0.975205	0.0424035			0.95003	0.954799	0.996942	0.508668	0.971036
hsa-miR-574-3p	24.4695	24.5896	24.6704	24.5976	26.5637	24.5292		-7.20177	-7.29523	-7.27208	-7.31904	-6.42098	-7.24902			-0.0934565	-0.0703042	-0.117268	0.78079	-0.0472453			1.06692	1.04994	1.08468	0.582048	1.03329
hsa-miR-576-3p	28.2089	28.417	28.4727	28.4694	30.1081	28.3076		-3.46229	-3.46782	-3.46983	-3.44723	-2.87657	-3.4706			-0.00552417	-0.0075345	0.0150605	0.585725	-0.008305			1.00384	1.00524	0.989615	0.666314	1.00577
hsa-miR-576-5p	25.8687	26.1426	26.1884	26.1095	27.9101	26.0407		-5.80256	-5.74226	-5.75407	-5.80713	-5.07461	-5.73745			0.060305	0.0484937	-0.0045645	0.727955	0.0651165			0.959061	0.966945	1.00317	0.603759	0.955868
hsa-miR-580-3p	29.6663	29.8114	29.8223	29.9505	31.7124	29.7131		-2.00492	-2.07341	-2.12022	-1.96615	-1.27225	-2.06511			-0.0684905	-0.115306	0.0387666	0.732666	-0.0601888			1.04862	1.0832	0.973487	0.601791	1.0426
hsa-miR-582-5p	23.6449	23.8606	23.9438	23.8659	25.6695	23.7576		-8.02631	-8.02419	-7.99872	-8.05078	-7.31517	-8.02064			0.002116	0.0275862	-0.024473	0.711135	0.00567217			0.998534	0.98106	1.01711	0.610839	0.996076
hsa-miR-589-3p	26.1509	26.315	26.3881	26.3135	28.2937	26.2601		-5.52037	-5.56979	-5.55439	-5.60319	-4.69099	-5.51812			-0.049426	-0.0340269	-0.0828215	0.829371	0.00224888			1.03485	1.02387	1.05909	0.562775	0.998442
hsa-miR-589-5p	25.2511	25.4477	25.5208	25.5225	27.2806	25.3371		-6.42013	-6.43715	-6.42177	-6.39421	-5.70406	-6.44104			-0.0170177	-0.00163317	0.0259255	0.716071	-0.02091			1.01187	1.00113	0.98219	0.608753	1.0146
hsa-miR-592	31.6722	31.7921	31.8301	31.9489	33.911	31.6236		0.000998948	-0.092697	-0.112463	0.0322077	0.92632	-0.154544			-0.0936959	-0.113461	0.0312088	0.925321	-0.155543			1.0671	1.08182	0.9786	0.526563	1.11384
hsa-miR-624-5p	30.1768	30.3287	30.3518	30.4393	32.3859	30.2206		-1.49448	-1.55618	-1.59075	-1.47736	-0.598806	-1.55754			-0.061692	-0.0962622	0.0171226	0.895677	-0.0630599			1.04369	1.069	0.988202	0.537495	1.04468
hsa-miR-628-5p	26.3188	26.552	26.5822	26.6231	28.3383	26.4203		-5.3524	-5.33287	-5.36032	-5.29357	-4.64636	-5.3579			0.0195343	-0.00791142	0.0588344	0.706049	-0.00549588			0.986551	1.0055	0.960039	0.612997	1.00382
hsa-miR-629-5p	26.3824	26.5361	26.6193	26.5979	28.2409	26.4357		-5.28888	-5.34877	-5.32319	-5.31878	-4.74376	-5.34253			-0.059884	-0.0343065	-0.029896	0.545122	-0.0536455			1.04238	1.02406	1.02094	0.685333	1.03788
hsa-miR-636	30.3851	30.5591	30.594	30.5919	32.5596	30.4488		-1.28613	-1.32576	-1.34851	-1.32481	-0.425073	-1.3294			-0.03963	-0.0623748	-0.038681	0.861059	-0.0432702			1.02785	1.04418	1.02717	0.550548	1.03045
hsa-miR-651-5p	28.2157	28.4084	28.4786	28.4489	30.2158	28.3223		-3.45551	-3.47641	-3.46394	-3.46781	-2.76886	-3.45592			-0.0209007	-0.00843517	-0.012304	0.686651	-0.000408167			1.01459	1.00586	1.00856	0.621294	1.00028
hsa-miR-659-3p	32.6961	32.8014	32.885	32.8692	34.8751	32.7595		1.0249	0.916579	0.942487	0.952498	1.89041	0.981358			-0.108326	-0.0824177	-0.072406	0.86551	-0.0435463			1.07798	1.05879	1.05147	0.548852	1.03064
hsa-miR-671-5p	27.3143	27.478	27.5458	27.5302	29.4502	27.3685		-4.35693	-4.40685	-4.39674	-4.38647	-3.53441	-4.4097			-0.0499193	-0.0398082	-0.029546	0.822516	-0.0527758			1.03521	1.02798	1.02069	0.565455	1.03726
hsa-miR-7-1-3p	23.368	23.6759	23.7303	23.6555	25.3934	23.4806		-8.30328	-8.20893	-8.21217	-8.26116	-7.59126	-8.29763			0.094355	0.0911096	0.0421213	0.71202	0.005652			0.936691	0.9388	0.971226	0.610465	0.99609
hsa-miR-744-5p	25.7198	26.0522	26.0356	26.0345	27.8737	25.8886		-5.9514	-5.83263	-5.9069	-5.88219	-5.11095	-5.88959			0.118771	0.0445043	0.069215	0.840446	0.0618138			0.920972	0.969623	0.953156	0.558471	0.958059
hsa-miR-758-3p	34.8957	35.0337	35.1338	34.9601	36.853	34.9812		3.22451	3.14886	3.19126	3.04343	3.86838	3.20299			-0.0756497	-0.0332511	-0.18108	0.643869	-0.0215196			1.05384	1.02332	1.13373	0.639995	1.01503
hsa-miR-7-5p	22.6376	22.7978	22.8999	22.7085	24.5368	22.7898		-9.03363	-9.08709	-9.04264	-9.20819	-8.44783	-8.98842			-0.0534602	-0.00901567	-0.174559	0.585799	0.0452097			1.03775	1.00627	1.12862	0.66628	0.969149
hsa-miR-767-5p	30.6125	30.8088	30.8429	30.7942	32.8397	30.7024		-1.05871	-1.07604	-1.09962	-1.12249	-0.144956	-1.07577			-0.0173365	-0.0409161	-0.063781	0.91375	-0.0170685			1.01209	1.02877	1.0452	0.530804	1.0119
hsa-miR-874-3p	24.973	25.28	25.2917	25.2624	27.1091	25.1293		-6.69822	-6.60489	-6.65078	-6.65422	-5.87554	-6.64884			0.0933322	0.0474365	0.044004	0.822684	0.0493802			0.937355	0.967654	0.969959	0.565389	0.966351
hsa-miR-877-3p	30.8551	31.021	31.0361	31.0437	32.7477	30.9189		-0.816128	-0.863862	-0.906412	-0.872959	-0.236987	-0.859318			-0.047734	-0.0902836	-0.056831	0.57914	-0.0431901			1.03364	1.06458	1.04018	0.669362	1.03039
hsa-miR-885-5p	34.9259	35.158	35.2191	35.1056	36.9158	35.0338		3.25467	3.27313	3.27662	3.18892	3.93119	3.25561			0.0184548	0.021946	-0.0657525	0.676514	0.000934167			0.98729	0.984903	1.04663	0.625675	0.999353
hsa-miR-887-3p	34.4405	34.7109	34.7431	34.6902	36.5801	34.5688		2.76922	2.82606	2.80056	2.77356	3.59542	2.79059			0.0568403	0.0313425	0.004341	0.8262	0.0213748			0.961367	0.978509	0.996996	0.564013	0.985293
hsa-miR-9-3p	26.3206	26.6321	26.6608	26.5799	28.6963	26.4999		-5.35067	-5.2527	-5.28173	-5.33675	-4.2884	-5.27826			0.0979733	0.0689422	0.0139205	1.06227	0.0724047			0.934345	0.953337	0.990397	0.478877	0.951051
hsa-miR-941	26.0051	26.1672	26.259	26.1624	27.8648	26.1428		-5.66613	-5.7176	-5.68356	-5.75429	-5.1199	-5.63541			-0.0514747	-0.0174331	-0.0881621	0.546223	0.0307198			1.03632	1.01216	1.06302	0.68481	0.978932
hsa-miR-9-5p	21.6044	21.8874	21.9213	21.8366	23.6807	21.7771		-10.0669	-9.9974	-10.0212	-10.0801	-9.30394	-10.0011			0.0694787	0.0456562	-0.0131835	0.762933	0.0657947			0.952982	0.968849	1.00918	0.589297	0.955419
hsa-miR-96-3p	29.7844	29.9493	30.0216	30.0721	32.2112	29.8073		-1.88687	-1.93549	-1.92092	-1.84456	-0.773442	-1.97091			-0.0486267	-0.0340495	0.0423015	1.11342	-0.0840458			1.03428	1.02388	0.971105	0.462196	1.05999
hsa-miR-96-5p	26.6996	26.8675	26.9596	26.8863	28.575	26.8054		-4.97161	-5.01738	-4.98289	-5.03033	-4.40963	-4.97275			-0.0457652	-0.0112787	-0.0587115	0.561985	-0.00113			1.03223	1.00785	1.04154	0.67737	1.00078
hsa-miR-99a-3p	27.2009	27.3857	27.4513	27.3646	29.0669	27.3118		-4.47039	-4.49914	-4.49125	-4.55209	-3.91773	-4.46634			-0.0287563	-0.0208602	-0.0817005	0.552657	0.004047			1.02013	1.01456	1.05826	0.681763	0.997199
hsa-miR-99a-5p	19.5576	19.7245	19.7675	19.7258	21.4725	19.6587		-12.1136	-12.1603	-12.175	-12.1909	-11.5121	-12.1195			-0.0466867	-0.0613823	-0.077281	0.601499	-0.005903			1.03289	1.04347	1.05503	0.659069	1.0041
hsa-miR-99b-3p	24.3333	24.5128	24.6073	24.5505	26.1321	24.4426		-7.33794	-7.37207	-7.33517	-7.36615	-6.85258	-7.33564			-0.034132	0.00276534	-0.0282147	0.485357	0.00230079			1.02394	0.998085	1.01975	0.71432	0.998406
U6 snRNA	31.6712	31.8848	31.9425	31.9167	32.9847	31.7782

## Sheet: Average
down-regulated	average								set 1							set 2							set 3
miRNA	un	un+P5 si	E27	E27+P5 si	E78	E78+P5 si			un	un+P5 si	E27	E27+P5 si	E78	E78+P5 si		un	un+P5 si	E27	E27+P5 si	E78	E78+P5 si		un	un+P5 si	E27	E27+P5 si	E78	E78+P5 si
hsa-let-7b-5p	1	1.02614	0.955526	1.01725	0.542244	0.972937			1	1.00159	0.913579	1.11615	0.526638	0.94504		1	1.04623	0.946539	0.963465	0.508571	0.920161		1	1.03059	1.00646	0.972132	0.591523	1.05361
hsa-let-7c-5p	1	0.99754	1.01607	1.03772	0.451475	1.01206			1	1.03457	1.12726	1.19136	0.43818	1.04752		1	0.941862	0.916176	0.898311	0.410826	0.937689		1	1.01618	1.00478	1.02348	0.505418	1.05099
hsa-let-7e-3p	1	1.00491	1.0466	0.962466	0.428458	0.966184			1	1.09586	1.09361	0.943147	0.377551	0.916621		1	0.956242	1.0297	0.986849	0.447846	0.985837		1	0.962624	1.01648	0.957403	0.459976	0.996096
hsa-let-7g-5p	1	0.997774	1.0278	0.967368	0.545031	0.959794			1	1.06358	1.07541	0.991462	0.552448	0.913773		1	0.9643	1.0043	0.954728	0.524917	0.960022		1	0.965438	1.00368	0.955915	0.557728	1.00559
hsa-let-7i-5p	1	1.02247	0.993583	0.978173	0.649295	0.968425			1	1.03641	0.931106	0.934198	0.664216	0.914658		1	1.03634	1.03462	1.04394	0.629053	0.989487		1	0.994651	1.01502	0.956377	0.654616	1.00113
hsa-miR-101-3p	1	1.03232	0.991763	1.04055	0.616117	1.0382			1	1.02607	0.96262	1.03797	0.624849	1.07107		1	1.01923	0.981538	1.04876	0.566421	1.01582		1	1.05166	1.03113	1.03492	0.65708	1.02773
hsa-miR-103a-3p	1	1.04147	1.00174	1.04062	0.641506	1.05183			1	1.0411	0.946938	0.971736	0.643852	1.08552		1	1.02764	1.01444	1.10823	0.603517	1.05693		1	1.05567	1.04384	1.04188	0.677148	1.01304
hsa-miR-106b-3p	1	1.05761	1.01238	1.03882	0.652456	1.04172			1	1.09616	0.966742	0.984831	0.661296	1.05735		1	1.01706	1.00767	1.10334	0.616997	1.03617		1	1.05963	1.06273	1.02828	0.679076	1.03164
hsa-miR-106b-5p	1	0.986652	0.986398	0.990181	0.583164	0.97749			1	0.971884	0.995291	1.03439	0.605842	0.96436		1	1.00236	0.983235	0.954133	0.534754	0.965555		1	0.985709	0.980668	0.982018	0.608897	1.00255
hsa-miR-10a-3p	1	1.05657	1.0242	1.06215	0.42144	1.0676			1	1.11015	1.03194	1.05827	0.351585	1.123		1	0.984402	0.972078	1.06845	0.422731	1.03013		1	1.07515	1.06859	1.05972	0.490005	1.04966
hsa-miR-10a-5p	1	0.940807	0.993513	0.959742	0.455117	0.939742			1	0.926425	1.07664	1.06768	0.449178	0.911223		1	0.963753	0.967784	0.856962	0.425445	0.923828		1	0.932243	0.936119	0.95458	0.490729	0.984176
hsa-miR-10b-5p	1	1.00061	0.967542	1.02746	0.573312	1.02049			1	0.942429	0.939557	1.05505	0.57326	1.05363		1	1.03166	0.973562	1.00085	0.52202	0.999328		1	1.02774	0.989506	1.02647	0.624657	1.00852
hsa-miR-1179	1	1.05072	1.05302	1.05405	0.607513	1.06173			1	1.15105	1.12431	1.07731	0.63766	1.1145		1	0.943099	0.963452	1.02914	0.550446	1.01712		1	1.058	1.07131	1.0557	0.634432	1.05357
hsa-miR-122-5p	1	1.01749	1.0053	1.06307	0.630289	1.05145			1	1.03017	1.06618	1.16591	0.689692	1.12176		1	0.968468	0.926122	0.964183	0.53459	0.980887		1	1.05383	1.02361	1.05913	0.666584	1.05169
hsa-miR-1243	1	1.00613	1.02654	1.03267	0.648096	1.03429			1	1.04446	1.1036	1.09032	0.721464	1.08024		1	0.951907	0.957684	0.968329	0.55957	0.995367		1	1.02202	1.01835	1.03935	0.663255	1.02726
hsa-miR-1249	1	1.00015	1.01772	0.980233	0.322136	0.970558			1	1.04836	1.05567	1.01306	0.244031	0.938221		1	0.973277	0.993531	0.959015	0.345844	0.962352		1	0.978819	1.00396	0.968618	0.376532	1.0111
hsa-miR-125a-3p	1	1.06674	1.00639	1.04997	0.697055	1.05209			1	1.09555	0.943137	0.987862	0.719513	1.0759		1	1.0297	1.00612	1.12478	0.650405	1.04361		1	1.07496	1.06991	1.03726	0.721248	1.03676
hsa-miR-125b-5p	1	1.04515	1.02248	1.06619	0.561001	1.09436			1	1.06379	1.00632	0.995281	0.533828	1.17732		1	0.996854	1.00237	1.11824	0.532443	1.08761		1	1.0748	1.05874	1.08504	0.616732	1.01815
hsa-miR-126-3p	1	0.981077	0.98208	0.969262	0.60983	0.960038			1	0.956698	0.963967	0.978295	0.637126	0.924057		1	1.01852	1.01103	0.968213	0.568486	0.971884		1	0.968015	0.971241	0.961279	0.623879	0.984173
hsa-miR-1269a	1	1.0721	0.996366	1.02952	0.535537	0.992925			1	1.13997	0.963831	1.08853	0.504411	0.958961		1	1.01859	0.958473	1.02077	0.523485	0.9386		1	1.05772	1.06679	0.979266	0.578715	1.08121
hsa-miR-1271-5p	1	1.04582	0.999306	1.06292	0.63317	1.04394			1	1.07284	1.01377	1.1412	0.670351	1.08804		1	0.993186	0.936094	1.00448	0.55751	0.976433		1	1.07145	1.04806	1.04309	0.671649	1.06735
hsa-miR-1296-5p	1	0.979864	1.01941	1.00737	0.675989	1.03376			1	0.9733	1.05648	0.976344	0.750402	1.07688		1	0.972903	1.01204	1.00804	0.595009	1.05023		1	0.993388	0.98971	1.03773	0.682555	0.974181
hsa-miR-132-3p	1	1.00415	0.973026	1.0409	0.614722	1.00862			1	0.979646	0.999753	1.17284	0.664454	1.03777		1	1.00012	0.92338	0.93115	0.526849	0.940657		1	1.03268	0.995947	1.01871	0.652862	1.04742
hsa-miR-132-5p	1	1.07006	1.02956	1.01903	0.723872	1.02269			1	1.14949	0.968604	0.920908	0.755885	1.00094		1	1.01608	1.04206	1.13573	0.697885	1.04255		1	1.04462	1.07803	1.00047	0.717845	1.02459
hsa-miR-133b	1	1.00082	0.981465	1.00297	0.625621	0.972407			1	1.00081	0.99845	1.10061	0.67768	0.953453		1	1.00078	0.953197	0.931851	0.555513	0.930749		1	1.00088	0.992748	0.976449	0.643672	1.03302
hsa-miR-135a-5p	1	0.983783	1.03546	0.962038	0.531175	0.967867			1	1.03946	1.09066	0.956576	0.532829	0.932497		1	0.957537	1.02245	0.963881	0.515203	0.987334		1	0.954352	0.993261	0.965659	0.545494	0.983771
hsa-miR-135b-5p	1	1.00169	0.979059	0.993726	0.552242	0.987772			1	0.971036	0.935048	0.979809	0.533714	0.972461		1	1.03415	1.01025	1.01523	0.531826	0.996243		1	0.99988	0.991876	0.986134	0.591186	0.994611
hsa-miR-140-3p	1	1.02704	1.037	1.05775	0.57791	1.08986			1	1.06055	1.07315	1.01675	0.580143	1.1792		1	0.965317	0.991729	1.07059	0.530983	1.07693		1	1.05525	1.04613	1.08591	0.622604	1.01345
hsa-miR-140-5p	1	1.12154	1.00709	1.0797	0.712168	1.06289			1	1.19302	0.915777	1.03495	0.719984	1.07897		1	1.04497	0.982968	1.1654	0.673155	1.02105		1	1.12662	1.12252	1.03874	0.743364	1.08866
hsa-miR-141-3p	1	0.99746	1.011	0.998304	0.527093	1.00227			1	1.0118	1.03013	0.99779	0.514797	1.00499		1	0.985266	1.00111	0.99463	0.503366	1.0036		1	0.995315	1.00175	1.00249	0.563115	0.998226
hsa-miR-142-5p	1	0.996318	1.00527	0.978693	0.458704	0.974574			1	1.01399	1.00908	0.978955	0.414505	0.945116		1	0.99549	1.01069	0.984952	0.461236	0.982564		1	0.979471	0.996041	0.972171	0.500372	0.996043
hsa-miR-143-3p	1	0.952294	1.01944	0.980818	0.389152	0.940462			1	0.994636	1.18082	1.17698	0.371302	0.914691		1	0.920255	0.921756	0.809083	0.364506	0.881563		1	0.94199	0.955756	0.956395	0.431649	1.02513
hsa-miR-145-5p	1	0.988987	0.997689	1.01176	0.644574	1.02868			1	0.958126	0.993281	0.980939	0.685144	1.06394		1	1.00338	1.00967	1.02285	0.580404	1.04145		1	1.00546	0.990115	1.03148	0.668172	0.98064
hsa-miR-146a-5p	1	1.03415	1.00686	1.00594	0.582899	1.00545			1	1.06192	0.962847	0.955986	0.565543	0.988227		1	1.01911	1.02276	1.06775	0.571162	1.01672		1	1.02142	1.03497	0.994096	0.611991	1.0114
hsa-miR-1471	1	1.07003	1.06119	1.08138	0.589505	1.10174			1	1.17691	1.12351	1.07491	0.597961	1.1916		1	0.943434	0.964524	1.07761	0.539781	1.05288		1	1.08975	1.09555	1.09161	0.630772	1.06074
hsa-miR-148b-3p	1	1.06077	1.04714	1.03558	0.621936	1.06103			1	1.13902	1.01505	0.911293	0.608654	1.08296		1	0.992559	1.04754	1.15478	0.612157	1.09013		1	1.05074	1.07883	1.04066	0.644998	1.00999
hsa-miR-148b-5p	1	0.995958	0.999123	1.03965	0.589822	1.07968			1	0.941471	0.97214	0.951204	0.583765	1.16425		1	1.01423	1.02533	1.08874	0.545138	1.10634		1	1.03218	0.9999	1.07901	0.640563	0.968438
hsa-miR-150-5p	1	0.991134	1.04729	1.00095	0.47761	1.0106			1	1.05471	1.1498	1.03286	0.46469	1.0286		1	0.932585	0.983963	0.955776	0.454256	0.997933		1	0.98611	1.0081	1.0142	0.513883	1.00528
hsa-miR-153-3p	1	0.978391	0.988158	1.02752	0.526332	1.0297			1	0.937142	1.02603	1.08265	0.527999	1.08668		1	0.987234	0.961072	0.95748	0.471932	1.00186		1	1.0108	0.977372	1.04244	0.579066	1.00055
hsa-miR-16-1-3p	1	1.08497	0.99267	1.03999	0.693586	1.00294			1	1.14906	0.940185	1.08611	0.730189	0.974047		1	1.03132	0.959541	1.04693	0.640961	0.947008		1	1.07452	1.07828	0.986938	0.709608	1.08777
hsa-miR-17-3p	1	1.03342	1.03783	1.013	0.723564	1.01945			1	1.10973	1.06217	0.990564	0.808322	1.02125		1	0.970295	1.00475	1.03786	0.652903	1.01537		1	1.02023	1.04656	1.01057	0.709468	1.02173
hsa-miR-17-5p	1	0.970203	1.03491	0.986172	0.538174	1.00015			1	1.00022	1.12339	1.00355	0.556507	1.01349		1	0.943483	0.998232	0.948249	0.49686	1.00494		1	0.966904	0.983095	1.00672	0.561153	0.982025
hsa-miR-181a-3p	1	1.04901	0.988445	1.09115	0.445734	1.06293			1	1.05761	1.01139	1.22014	0.398783	1.13686		1	0.994354	0.905306	0.987079	0.413383	0.965268		1	1.09506	1.04864	1.06623	0.525035	1.08666
hsa-miR-181a-5p	1	0.949799	1.03414	0.988518	0.563115	1.02562			1	0.943204	1.11788	0.960723	0.593168	1.07111		1	0.945805	1.02024	0.969889	0.510363	1.05589		1	0.960388	0.964293	1.03494	0.585813	0.949879
hsa-miR-181c-3p	1	1.06324	1.00199	1.01775	0.60603	1.01198			1	1.0956	0.910895	0.934306	0.573843	0.98537		1	1.04777	1.03456	1.12628	0.607755	1.02696		1	1.04635	1.06051	0.992658	0.636493	1.02361
hsa-miR-182-5p	1	0.986276	1.04179	1.02245	0.702069	1.06983			1	0.996724	1.09284	0.949043	0.787086	1.14423		1	0.956583	1.0265	1.04863	0.614983	1.09803		1	1.00552	1.00604	1.06969	0.704137	0.967226
hsa-miR-183-5p	1	0.986276	1.04179	1.02245	0.702069	1.06983			1	0.996724	1.09284	0.949043	0.787086	1.14423		1	0.956583	1.0265	1.04863	0.614983	1.09803		1	1.00552	1.00604	1.06969	0.704137	0.967226
hsa-miR-186-5p	1	0.94814	1.04919	1.00818	0.580661	1.04708			1	0.956106	1.18861	1.02067	0.639066	1.12681		1	0.917236	0.989822	0.942357	0.501821	1.05071		1	0.971076	0.969144	1.06151	0.601097	0.963735
hsa-miR-187-3p	1	1.00199	1.00132	1.06825	0.512566	1.0853			1	0.972497	1.04395	1.10569	0.499069	1.19787		1	0.978723	0.951005	1.0046	0.458514	1.04085		1	1.05474	1.00902	1.09447	0.580115	1.01717
hsa-miR-188-3p	1	0.981263	0.995827	0.993891	0.598269	0.978681			1	0.981222	1.04096	1.06928	0.644739	0.972842		1	0.980126	0.967061	0.926063	0.533085	0.953839		1	0.982441	0.979456	0.986327	0.616982	1.00936
hsa-miR-18a-5p	1	0.956042	1.01481	0.991059	0.580984	1.02022			1	0.929404	1.06291	0.96476	0.610941	1.05862		1	0.969955	1.0181	0.979522	0.526173	1.04752		1	0.968767	0.963406	1.02889	0.605837	0.954535
hsa-miR-18b-5p	1	0.997793	1.00534	1.00124	0.605005	1.00688			1	0.999606	1.01115	0.990895	0.627452	1.01405		1	0.994473	1.00458	1.00583	0.55946	1.01162		1	0.9993	1.00028	1.007	0.628103	0.994985
hsa-miR-190a-5p	1	1.0111	0.984745	1.03174	0.50039	1.04559			1	0.964944	0.938213	0.982669	0.451606	1.09043		1	1.0324	1.00878	1.06831	0.48614	1.05341		1	1.03594	1.00724	1.04424	0.563424	0.992932
hsa-miR-191-3p	1	1.10678	1.01964	1.07712	0.629067	1.07226			1	1.18425	0.958085	1.02758	0.609072	1.10467		1	1.02164	0.986487	1.15273	0.605244	1.03683		1	1.11445	1.11436	1.05103	0.672885	1.07527
hsa-miR-193b-3p	1	0.990065	1.07162	0.98469	0.612662	1.01052			1	1.08011	1.18111	0.961268	0.667003	1.01773		1	0.920143	1.01995	0.983975	0.56327	1.02895		1	0.96994	1.01381	1.00883	0.607713	0.984894
hsa-miR-194-5p	1	1.06646	0.961775	1.11993	0.522253	1.10225			1	1.01482	0.91365	1.19389	0.47942	1.21551		1	1.04619	0.915205	1.06341	0.472242	1.00902		1	1.13837	1.05647	1.1025	0.615096	1.08223
hsa-miR-195-5p	1	0.978909	1.00454	1.00769	0.500455	0.979853			1	0.998066	1.10065	1.15024	0.512939	0.984107		1	0.95318	0.932406	0.880807	0.449653	0.924967		1	0.985482	0.980569	0.992022	0.538772	1.03048
hsa-miR-196a-5p	1	1.05853	1.07499	1.05711	0.706625	1.09797			1	1.16674	1.1166	0.961759	0.764922	1.17049		1	0.946349	1.01969	1.12769	0.644612	1.10319		1	1.06249	1.08867	1.08189	0.710342	1.02023
hsa-miR-196b-3p	1	1.04138	1.04499	1.0177	0.658737	1.0119			1	1.14765	1.10283	1.04829	0.720187	1.00851		1	0.952236	0.976695	1.00057	0.597883	0.980841		1	1.02425	1.05544	1.00424	0.658141	1.04635
hsa-miR-196b-5p	1	0.972511	1.00154	0.981059	0.568609	0.998795			1	0.944972	0.99812	0.935611	0.572168	1.00163		1	1.00094	1.03384	1.00675	0.538043	1.03468		1	0.97162	0.972665	1.00081	0.595615	0.96008
hsa-miR-199b-5p	1	1.05192	1.03309	1.08681	0.667854	1.0861			1	1.11644	1.10325	1.16181	0.738151	1.17835		1	0.952056	0.927751	1.01309	0.566983	1.00709		1	1.08726	1.06828	1.08552	0.69843	1.07287
hsa-miR-19a-3p	1	1.01743	1.03776	1.04949	0.736893	1.10629			1	1.02134	1.02542	0.90589	0.800128	1.19837		1	0.987528	1.05066	1.14787	0.663225	1.15016		1	1.04343	1.03721	1.0947	0.747327	0.970357
hsa-miR-19b-1-5p	1	1.01264	1.04272	1.005	0.577178	1.01381			1	1.08379	1.10312	1.00547	0.596245	1.02126		1	0.952112	0.997277	0.998952	0.539727	1.00782		1	1.00203	1.02776	1.01057	0.595562	1.01236
hsa-miR-200a-3p	1	1.01992	1.01325	1.04717	0.45391	1.07712			1	1.01113	0.998931	0.977692	0.390814	1.15031		1	1.00053	1.01134	1.0913	0.449786	1.08469		1	1.04808	1.02948	1.07252	0.52113	0.996356
hsa-miR-205-5p	1	0.989978	1.04032	1.03421	0.594406	1.0479			1	1.02733	1.15582	1.09139	0.649079	1.11764		1	0.930155	0.957216	0.954053	0.514108	1.01196		1	1.01245	1.00792	1.05719	0.620031	1.0141
hsa-miR-20a-3p	1	1.02599	0.994962	1.05035	0.578076	1.02773			1	1.04089	1.02652	1.15131	0.598221	1.06421		1	0.986997	0.931972	0.968132	0.51326	0.961426		1	1.05007	1.02639	1.0316	0.622748	1.05756
hsa-miR-20a-5p	1	0.996444	1.01318	0.98972	0.50307	0.961206			1	1.05069	1.08897	1.10296	0.506158	0.929869		1	0.958281	0.952183	0.901906	0.470521	0.918188		1	0.980363	0.998401	0.964297	0.532532	1.03556
hsa-miR-210-3p	1	1.02615	1.04477	1.022	0.683787	1.03202			1	1.10348	1.10176	1.02119	0.759239	1.05548		1	0.9527	0.989569	1.01744	0.610182	1.01665		1	1.02226	1.04298	1.02736	0.68194	1.02394
hsa-miR-212-5p	1	1.08804	1.02557	1.04769	0.70124	1.05753			1	1.15052	0.932627	0.911186	0.698366	1.06416		1	1.03549	1.0476	1.20031	0.687568	1.08069		1	1.07812	1.09647	1.03158	0.717787	1.02774
hsa-miR-214-3p	1	1.02546	1.02515	1.06665	0.513451	1.09177			1	1.04259	1.0617	1.0564	0.488834	1.19104		1	0.970506	0.972939	1.05221	0.476657	1.06181		1	1.06328	1.04082	1.09135	0.574861	1.02246
hsa-miR-21-5p	1	1.02842	0.990819	1.06086	0.498874	1.06449			1	1.00802	0.978133	1.07354	0.459173	1.13485		1	1.01112	0.965142	1.04375	0.469463	1.02816		1	1.06612	1.02918	1.0653	0.567986	1.03046
hsa-miR-216a-5p	1	0.994537	1.03873	1.01127	0.569173	1.05528			1	1.00844	1.05369	0.905513	0.562552	1.10128		1	0.974188	1.05088	1.07887	0.545239	1.10281		1	1.00098	1.01163	1.04942	0.599728	0.961751
hsa-miR-216b-5p	1	1.00931	1.02804	1.04605	0.541065	1.09104			1	1.0067	1.03654	0.956951	0.517428	1.18062		1	0.982218	1.02225	1.09464	0.512417	1.11074		1	1.03902	1.02535	1.08657	0.593349	0.981747
hsa-miR-219a-1-3p	1	1.06853	1.03732	1.05917	0.559698	1.05518			1	1.16408	1.06874	1.08443	0.550995	1.09284		1	0.967307	0.960284	1.04769	0.526034	1.00387		1	1.07421	1.08294	1.04539	0.602065	1.06885
hsa-miR-219a-5p	1	1.02762	0.989535	1.03136	0.624416	1.00923			1	1.03949	0.990462	1.09901	0.657848	1.01814		1	1.0048	0.953894	0.986041	0.560453	0.962505		1	1.03856	1.02425	1.00903	0.654947	1.04705
hsa-miR-22-3p	1	0.965563	1.03175	0.995783	0.690498	1.03228			1	0.96357	1.08931	0.949184	0.782608	1.07546		1	0.958128	1.02642	1.00112	0.603875	1.06444		1	0.974989	0.979524	1.03704	0.685011	0.956943
hsa-miR-224-3p	1	1.05175	0.986236	1.09587	0.63763	1.08301			1	1.0421	0.983682	1.17279	0.668277	1.17569		1	1.00826	0.923402	1.03054	0.54939	1.00124		1	1.10489	1.05162	1.08429	0.695222	1.07209
hsa-miR-224-5p	1	1.02656	0.998769	1.02428	0.579209	1.03828			1	1.01288	0.939494	0.942572	0.553063	1.0596		1	1.0317	1.03001	1.10089	0.562401	1.06026		1	1.03511	1.0268	1.02937	0.622162	0.994965
hsa-miR-22-5p	1	1.0622	0.98536	1.03918	0.54746	0.990006			1	1.11422	0.974147	1.1608	0.536133	0.964282		1	1.01318	0.928157	0.974757	0.513944	0.911431		1	1.05919	1.05378	0.981979	0.592303	1.0943
hsa-miR-23b-3p	1	1.02378	1.01397	1.00503	0.608317	1.00161			1	1.06483	1.01362	0.999331	0.624474	0.990593		1	0.993259	1.00033	1.02046	0.572916	0.995619		1	1.01326	1.02796	0.995285	0.62756	1.01863
hsa-miR-23b-5p	1	1.01097	1.06511	0.975941	0.512986	0.971375			1	1.14092	1.17725	1.01941	0.517362	0.933674		1	0.921651	0.990433	0.942141	0.495907	0.957023		1	0.970329	1.02766	0.966268	0.525688	1.02343
hsa-miR-24-1-5p	1	0.984438	0.971114	1.0179	0.538719	0.981544			1	0.956561	1.01182	1.16302	0.557541	0.988542		1	0.994142	0.927269	0.896413	0.476029	0.921941		1	1.00261	0.974253	0.994255	0.582586	1.03415
hsa-miR-25-5p	1	1.00956	1.00726	1.05088	0.509872	1.01943			1	1.04133	1.10018	1.2143	0.519664	1.05979		1	0.953382	0.90748	0.908887	0.450034	0.934218		1	1.03396	1.01412	1.02946	0.559917	1.06429
hsa-miR-26a-5p	1	1.06411	0.996587	1.05368	0.631515	1.01963			1	1.11611	0.992662	1.14425	0.660178	1.02579		1	1.00369	0.934843	1.00397	0.569517	0.946822		1	1.07253	1.06226	1.01281	0.66485	1.08628
hsa-miR-26b-3p	1	0.989647	1.02209	0.993341	0.623175	1.01962			1	0.994697	1.02573	0.920904	0.648159	1.03278		1	0.987378	1.04206	1.04286	0.584181	1.059		1	0.986865	0.998485	1.01626	0.637185	0.967081
hsa-miR-27a-3p	1	0.998787	1.03372	1.00641	0.625168	1.01338			1	1.04714	1.1037	1.02911	0.680778	1.0308		1	0.951862	0.985754	0.974837	0.560186	1.00082		1	0.997362	1.01171	1.01528	0.63454	1.00851
hsa-miR-28-3p	1	0.954571	0.986414	0.957744	0.563829	0.964677			1	0.90858	0.980996	0.939723	0.574019	0.941411		1	1.00964	1.03157	0.963247	0.531859	1.0009		1	0.945493	0.946674	0.970263	0.585608	0.951721
hsa-miR-299-5p	1	0.98872	1.05696	1.03585	0.312256	1.08191			1	1.02321	1.15883	1.00459	0.235589	1.17808		1	0.928945	0.997715	1.01758	0.321768	1.08292		1	1.014	1.01432	1.0854	0.379412	0.984724
hsa-miR-29b-3p	1	0.989818	1.0281	1.00922	0.569685	1.04549			1	0.992136	1.0448	0.930584	0.568773	1.08835		1	0.978326	1.03663	1.05384	0.538699	1.08145		1	0.998992	1.00286	1.04324	0.601582	0.966652
hsa-miR-29c-3p	1	1.02964	0.985483	1.04278	0.494141	1.00695			1	1.04572	1.00532	1.16553	0.472088	1.0187		1	0.997351	0.92627	0.953492	0.458975	0.934892		1	1.04586	1.02486	1.00931	0.551359	1.06724
hsa-miR-301b	1	1.00713	1.01904	1.03966	0.618263	1.04477			1	1.02851	1.07958	1.0854	0.66661	1.10234		1	0.962437	0.959854	0.983646	0.540882	1.00777		1	1.03043	1.01769	1.04992	0.647298	1.02421
hsa-miR-30b-5p	1	1.03387	1.04626	1.02809	0.583311	1.01693			1	1.13789	1.1383	1.10455	0.617885	1.02932		1	0.937285	0.951498	0.965173	0.528773	0.965346		1	1.02643	1.04898	1.01455	0.603276	1.05613
hsa-miR-30d-5p	1	0.979442	1.03211	0.973551	0.65047	0.981013			1	1.02154	1.09695	0.98043	0.724789	0.965484		1	0.954786	1.00993	0.957632	0.586701	0.992349		1	0.961998	0.989437	0.982591	0.639921	0.985205
hsa-miR-30e-3p	1	0.987678	0.992193	0.991337	0.521356	1.00605			1	0.950871	0.956001	0.930675	0.488631	1.00941		1	1.02275	1.03658	1.03864	0.510985	1.04144		1	0.989411	0.984001	1.00469	0.564452	0.967305
hsa-miR-31-3p	1	1.01097	1.00854	0.987713	0.458791	0.947617			1	1.08139	1.07053	1.11791	0.436973	0.894895		1	0.966498	0.945792	0.899236	0.444324	0.894709		1	0.985038	1.0093	0.945989	0.495077	1.05325
hsa-miR-31-5p	1	0.994765	1.02157	1.04004	0.663691	1.05556			1	1.00294	1.09236	1.07359	0.744177	1.13053		1	0.956793	0.965121	0.983282	0.564107	1.02618		1	1.02456	1.00722	1.06326	0.682788	1.00997
hsa-miR-324-3p	1	0.989033	0.988577	1.06339	0.643369	1.07271			1	0.938867	1.03344	1.12807	0.708537	1.18113		1	0.983686	0.941525	0.975302	0.534142	1.02325		1	1.04455	0.990764	1.0868	0.687429	1.01375
hsa-miR-324-5p	1	0.961397	1.00599	0.987449	0.705929	1.01134			1	0.928781	1.03026	0.955503	0.802387	1.03635		1	0.985205	1.02302	0.988829	0.61524	1.04145		1	0.970205	0.964681	1.01801	0.700159	0.956219
hsa-miR-32-5p	1	0.976423	0.981414	1.00012	0.57631	0.97353			1	0.958039	1.02757	1.11456	0.616697	0.970141		1	0.986494	0.947215	0.900849	0.507873	0.932966		1	0.984735	0.969458	0.984957	0.60436	1.01748
hsa-miR-326	1	1.06945	1.01797	1.04965	0.459612	1.06287			1	1.10693	0.946283	0.9417	0.374276	1.08962		1	1.02799	1.03049	1.1634	0.482141	1.07567		1	1.07344	1.07713	1.04385	0.52242	1.02331
hsa-miR-331-3p	1	1.03837	0.996428	1.04676	0.566694	1.05076			1	1.03501	0.960388	1.02143	0.544778	1.09249		1	1.02041	0.989452	1.07363	0.536091	1.0342		1	1.05968	1.03944	1.04522	0.619213	1.0256
hsa-miR-338-3p	1	0.949877	1.03458	0.96277	0.599317	0.988062			1	0.961202	1.11073	0.939949	0.650029	0.988649		1	0.948848	1.03145	0.954054	0.54702	1.02558		1	0.93958	0.961568	0.994308	0.600901	0.94996
hsa-miR-339-3p	1	1.04277	1.04549	1.04962	0.698234	1.07639			1	1.10691	1.07018	0.993362	0.757558	1.1382		1	0.966657	1.00334	1.08864	0.628011	1.07042		1	1.05473	1.06296	1.06686	0.709133	1.02054
hsa-miR-33a-5p	1	0.967365	1.03814	0.971763	0.51669	1			1	0.989961	1.0923	0.922112	0.508859	1.00179		1	0.956815	1.04138	0.992281	0.500068	1.04231		1	0.955318	0.980727	1.0009	0.541144	0.955894
hsa-miR-340-3p	1	1.04308	1.03401	1.05431	0.647199	1.08082			1	1.08598	1.03716	0.989962	0.669599	1.14758		1	0.981922	1.00506	1.10172	0.595075	1.07667		1	1.06135	1.05983	1.07125	0.676924	1.01822
hsa-miR-340-5p	1	0.979015	1.00782	0.978402	0.558158	0.980661			1	0.984285	1.03561	0.986236	0.569795	0.967259		1	0.982655	1.00695	0.965478	0.523981	0.990332		1	0.970105	0.980885	0.983493	0.5807	0.984391
hsa-miR-34a-3p	1	1.03945	0.994306	1.07117	0.70606	1.07229			1	1.03112	0.984365	1.09259	0.770938	1.14839		1	1.00791	0.956692	1.04928	0.607915	1.02522		1	1.07934	1.04186	1.07163	0.739326	1.04327
hsa-miR-34a-5p	1	1.0226	0.987548	1.02685	0.548428	1.03423			1	0.994001	0.930795	0.974118	0.513965	1.05889		1	1.03651	1.0132	1.07742	0.530777	1.0426		1	1.03728	1.01865	1.02902	0.600543	1.00121
hsa-miR-34c-3p	1	0.979428	0.986608	1.02	0.641511	1.01846			1	0.941563	1.01807	1.07445	0.705968	1.06085		1	0.991086	0.964734	0.955589	0.551215	0.993654		1	1.00563	0.977022	1.02998	0.66735	1.00088
hsa-miR-34c-5p	1	0.950004	1.05041	0.976601	0.502371	1.00913			1	0.975148	1.16362	0.962819	0.508292	1.03553		1	0.927033	1.01913	0.949377	0.470327	1.03707		1	0.947832	0.968487	1.01761	0.528495	0.95478
hsa-miR-361-5p	1	1.00759	1.01245	1.03408	0.601313	1.04873			1	1.01036	1.03564	1.02887	0.623121	1.10347		1	0.98264	0.985869	1.0229	0.54353	1.03562		1	1.02976	1.01585	1.05046	0.63729	1.00711
hsa-miR-362-5p	1	1.00541	1.00201	1.04572	0.56172	1.03856			1	1.00662	1.05413	1.12668	0.580898	1.09576		1	0.973988	0.942104	0.963703	0.496159	0.98618		1	1.03561	1.0098	1.04678	0.608102	1.03373
hsa-miR-365a-3p	1	1.0333	1.0599	1.02283	0.541496	1.02672			1	1.14643	1.15189	1.05311	0.547701	1.04433		1	0.931738	0.974458	0.993458	0.508731	0.995822		1	1.02173	1.05336	1.02192	0.568058	1.04001
hsa-miR-373-3p	1	1.00414	1.01946	1.00129	0.439327	1.00617			1	1.03543	1.04658	0.999322	0.389872	1.0096		1	0.977495	1.00034	0.999758	0.439306	1.00513		1	0.9995	1.01148	1.00479	0.488804	1.0038
hsa-miR-373-5p	1	0.993491	1.02182	0.987892	0.49606	0.995226			1	1.02333	1.05387	0.978968	0.472551	0.988787		1	0.974106	1.01068	0.990331	0.484104	1.005		1	0.98304	1.00091	0.994377	0.531525	0.991889
hsa-miR-374a-5p	1	0.968027	1.00465	0.967798	0.585031	0.963384			1	0.97155	1.04725	1.00235	0.622272	0.93878		1	0.977181	0.998826	0.932136	0.536627	0.96777		1	0.955351	0.967873	0.968907	0.596194	0.983603
hsa-miR-374b-3p	1	1.01415	1.02482	1.00616	0.560753	1.01093			1	1.0596	1.05115	0.999968	0.561615	1.01451		1	0.975367	1.00002	1.01128	0.532047	1.00724		1	1.00749	1.0233	1.00723	0.588599	1.01103
hsa-miR-378a-5p	1	1.07951	1.0288	1.06319	0.626273	1.07566			1	1.14382	0.986035	0.983793	0.613184	1.11826		1	1.00706	1.0082	1.14829	0.601259	1.06615		1	1.08765	1.09216	1.05748	0.664376	1.04257
hsa-miR-421	1	1.0165	0.95868	1.00143	0.622623	0.964371			1	0.989695	0.913576	1.07366	0.64661	0.927656		1	1.04623	0.965089	0.967474	0.571152	0.929525		1	1.01358	0.997373	0.963149	0.650107	1.03593
hsa-miR-424-5p	1	1.00202	1.01891	1.04257	0.617604	1.09431			1	0.972354	1.0004	0.920936	0.621365	1.18485		1	0.999801	1.04204	1.11826	0.572624	1.13427		1	1.03389	1.01429	1.08851	0.658823	0.963805
hsa-miR-425-3p	1	0.993326	1.00967	0.992361	0.588541	0.985523			1	1.01634	1.04807	1.03124	0.619247	0.975906		1	0.9768	0.984736	0.957964	0.539588	0.972801		1	0.986839	0.996222	0.98788	0.606788	1.00786
hsa-miR-429	1	1.03315	1.02806	1.04548	0.621506	1.06645			1	1.068	1.03811	1.0023	0.638129	1.12385		1	0.981472	0.998854	1.07404	0.572274	1.0589		1	1.04997	1.0472	1.06012	0.654114	1.0166
hsa-miR-450a-5p	1	1.04236	1.01128	1.05355	0.50273	1.07691			1	1.04475	0.966535	0.966669	0.44416	1.13713		1	1.01716	1.01709	1.12762	0.498325	1.08459		1	1.06516	1.0502	1.06636	0.565704	1.009
hsa-miR-451a	1	0.974485	1.04166	0.98246	0.51312	0.997993			1	1.01765	1.13034	0.989043	0.516069	1.00436		1	0.940578	1.00552	0.956161	0.484647	1.00771		1	0.965225	0.989113	1.00218	0.538643	0.981905
hsa-miR-452-5p	1	0.979767	0.985819	0.993221	0.444553	0.950671			1	0.989076	1.05346	1.15293	0.426403	0.922023		1	0.974295	0.931319	0.866512	0.416677	0.894271		1	0.975929	0.972677	0.96022	0.49058	1.03572
hsa-miR-454-3p	1	0.977617	1.0225	1.03821	0.6189	1.05338			1	0.976749	1.12284	1.09846	0.688344	1.13811		1	0.943715	0.95413	0.949361	0.522069	1.01789		1	1.01239	0.990533	1.06682	0.646287	1.00416
hsa-miR-455-3p	1	1.06656	1.00045	1.05781	0.611001	1.04528			1	1.10123	0.96606	1.06834	0.608278	1.07224		1	1.01741	0.96749	1.06962	0.569664	1.00183		1	1.08103	1.06779	1.03549	0.655062	1.06176
hsa-miR-455-5p	1	0.998773	0.977415	1.01235	0.675319	0.985075			1	0.983617	0.991726	1.10749	0.756563	0.982825		1	1.00416	0.950233	0.938178	0.582042	0.942038		1	1.00854	0.990285	0.991375	0.687353	1.03036
hsa-miR-483-3p	1	0.977947	1.01043	0.992121	0.434044	0.999632			1	0.977954	1.05049	1.0033	0.391548	1.01		1	0.975673	0.998354	0.968074	0.426212	1.00333		1	0.980215	0.982458	1.00499	0.484373	0.985564
hsa-miR-485-3p	1	1.01305	1.00058	1.00089	0.549682	1.00525			1	1.01428	0.967426	0.957704	0.526043	0.998711		1	1.0167	1.02184	1.04562	0.536598	1.02118		1	1.00816	1.01247	0.999355	0.586405	0.995847
hsa-miR-489-3p	1	0.981447	1.02105	1.00303	0.59362	1.00479			1	1.00354	1.09898	1.05425	0.641745	1.02518		1	0.953905	0.973933	0.942327	0.52719	0.98612		1	0.986898	0.990228	1.01251	0.611926	1.00306
hsa-miR-491-3p	1	0.981773	1.04058	0.972779	0.518106	0.989982			1	1.02903	1.09829	0.945274	0.5111	0.977554		1	0.954207	1.02854	0.984348	0.503287	1.01693		1	0.96208	0.994914	0.988714	0.53993	0.975461
hsa-miR-497-5p	1	1.03689	1.02851	1.02968	0.667564	1.05697			1	1.06744	0.990804	0.91496	0.683288	1.08717		1	1.00463	1.04544	1.13142	0.634253	1.09005		1	1.03861	1.04927	1.04267	0.685152	0.993688
hsa-miR-500a-5p	1	0.958621	1.05096	0.982104	0.53755	0.997986			1	1.00376	1.1865	1.02023	0.571612	1.01627		1	0.918051	0.990038	0.917987	0.48682	0.998057		1	0.954053	0.976348	1.0081	0.554219	0.979635
hsa-miR-501-3p	1	1.03173	1.00285	1.04835	0.472208	1.05886			1	1.03025	0.983102	1.02186	0.416486	1.11283		1	1.00856	0.989248	1.0683	0.462128	1.04356		1	1.05639	1.0362	1.05491	0.538011	1.02018
hsa-miR-501-5p	1	0.999834	1.03171	0.992654	0.628271	1.00579			1	1.04281	1.06718	0.967165	0.669239	1.00563		1	0.968015	1.01683	1.00799	0.581447	1.01969		1	0.988674	1.01112	1.00281	0.634128	0.992041
hsa-miR-502-5p	1	0.963389	1.02894	0.994127	0.494458	1.03182			1	0.954706	1.07985	0.941332	0.475525	1.07438		1	0.962315	1.03069	1.00452	0.472555	1.06834		1	0.973147	0.976264	1.03653	0.535294	0.952745
hsa-miR-503-5p	1	1.01443	1.00167	1.03564	0.579839	1.04986			1	1.00117	0.990441	1.00741	0.576494	1.10011		1	1.00481	0.996314	1.05064	0.537798	1.04499		1	1.03731	1.01825	1.04886	0.625226	1.00446
hsa-miR-504-5p	1	1.01903	1.02734	1.04621	0.497055	1.04372			1	1.06673	1.10401	1.11685	0.484837	1.09722		1	0.95173	0.946241	0.97429	0.457957	0.99117		1	1.03862	1.03176	1.04748	0.548371	1.04277
hsa-miR-509-3p	1	0.981682	1.02367	0.988761	0.556019	0.988877			1	1.01434	1.09586	1.03017	0.580591	0.987943		1	0.955262	0.985249	0.942162	0.510716	0.979291		1	0.975449	0.989891	0.993953	0.576751	0.999396
hsa-miR-518c-5p	1	0.967677	1.00919	1.0131	0.52194	1.04115			1	0.934899	1.05179	0.99765	0.517182	1.10308		1	0.975068	1.00118	0.99136	0.479993	1.05151		1	0.993063	0.974604	1.05028	0.568647	0.968856
hsa-miR-518e-5p	1	1.07436	1.02801	1.07567	0.472032	1.07945			1	1.14329	1.03008	1.07105	0.414549	1.14143		1	0.985293	0.966263	1.08759	0.463459	1.03233		1	1.09449	1.0877	1.06838	0.538087	1.06458
hsa-miR-520c-3p	1	0.99772	1.04108	1.00178	0.507144	1.02194			1	1.04546	1.09814	0.977256	0.490698	1.04176		1	0.954268	1.01157	1.0074	0.48889	1.03248		1	0.993436	1.01353	1.02067	0.541845	0.991581
hsa-miR-532-3p	1	1.0579	0.989255	1.06664	0.647711	1.05445			1	1.06382	0.953985	1.09054	0.666987	1.09999		1	1.02383	0.957589	1.06057	0.583965	1.00432		1	1.08604	1.05619	1.0488	0.69218	1.05904
hsa-miR-542-5p	1	0.972635	1.01873	0.979593	0.663494	0.994024			1	0.979279	1.05888	0.965013	0.737276	0.994763		1	0.971798	1.01797	0.976388	0.594378	1.0153		1	0.966826	0.979336	0.997378	0.658828	0.972013
hsa-miR-545-3p	1	0.999705	1.0084	1.02684	0.597115	1.05386			1	0.979483	1.00436	0.971514	0.604848	1.10986		1	0.997829	1.01455	1.05551	0.550983	1.06883		1	1.0218	1.0063	1.0535	0.635513	0.982881
hsa-miR-548a-3p	1	1.03622	0.990774	1.04439	0.573181	1.04303			1	1.02775	0.954381	1.03448	0.55667	1.07912		1	1.02362	0.983192	1.05988	0.538276	1.02135		1	1.0573	1.03475	1.03881	0.624597	1.02861
hsa-miR-548k	1	1.00408	1.02124	1.00775	0.579297	1.01943			1	1.02937	1.0458	0.99032	0.590101	1.03636		1	0.977856	1.00488	1.01491	0.541529	1.02298		1	1.00502	1.01305	1.01802	0.606263	0.998944
hsa-miR-550a-3p	1	1.02225	1.02479	1.05206	0.560143	1.03738			1	1.07669	1.11385	1.16342	0.586932	1.08683		1	0.947515	0.927113	0.950264	0.49379	0.966526		1	1.04255	1.0334	1.04251	0.599706	1.05878
hsa-miR-550a-5p	1	1.03344	1.02509	1.07234	0.508641	1.07069			1	1.07777	1.09608	1.15061	0.497308	1.15297		1	0.955166	0.932257	0.992629	0.460972	1.00103		1	1.06739	1.04695	1.07377	0.567643	1.05806
hsa-miR-556-3p	1	1.07105	0.998166	1.08349	0.629082	1.07793			1	1.08921	0.964391	1.09356	0.633137	1.14437		1	1.01829	0.956264	1.08715	0.571794	1.02297		1	1.10564	1.07384	1.06975	0.682316	1.06645
hsa-miR-556-5p	1	1.03595	1.02227	1.03277	0.595642	1.01503			1	1.10636	1.0737	1.10974	0.626146	1.02558		1	0.965067	0.949269	0.975845	0.53916	0.961335		1	1.03641	1.04383	1.01271	0.62162	1.05818
hsa-miR-561-3p	1	1.06069	1.03898	1.0329	0.59001	1.0225			1	1.16972	1.07406	1.06282	0.600969	1.02359		1	0.964906	0.969994	1.02414	0.554888	0.981369		1	1.04746	1.07289	1.01173	0.614172	1.06253
hsa-miR-572	1	0.948575	1.01685	0.976333	0.471515	0.984155			1	0.944469	1.10518	1.01914	0.464549	0.993893		1	0.951226	0.990565	0.912915	0.441328	0.987535		1	0.95003	0.954799	0.996942	0.508668	0.971036
hsa-miR-574-3p	1	1.03394	1.02885	1.06725	0.524172	1.08641			1	1.06775	1.06912	1.06834	0.504747	1.17653		1	0.967134	0.967485	1.04874	0.485721	1.04941		1	1.06692	1.04994	1.08468	0.582048	1.03329
hsa-miR-576-3p	1	1.00855	0.994006	0.998101	0.653864	0.992307			1	1.00886	0.974566	0.995581	0.694424	0.979338		1	1.01296	1.00222	1.00911	0.600853	0.991809		1	1.00384	1.00524	0.989615	0.666314	1.00577
hsa-miR-576-5p	1	0.961003	1.01594	0.975956	0.587762	0.998246			1	0.948797	1.05162	0.94395	0.616662	1.00635		1	0.97515	1.02926	0.980749	0.542866	1.03252		1	0.959061	0.966945	1.00317	0.603759	0.955868
hsa-miR-580-3p	1	1.08403	1.01422	1.01266	0.573232	0.998704			1	1.16441	0.926228	0.936716	0.52459	0.947677		1	1.03906	1.03323	1.12777	0.593315	1.00583		1	1.04862	1.0832	0.973487	0.601791	1.0426
hsa-miR-582-5p	1	0.982608	0.991498	1.00874	0.575331	1.00919			1	0.955827	1.01321	1.04075	0.595602	1.03451		1	0.993461	0.980226	0.968354	0.519553	0.996996		1	0.998534	0.98106	1.01711	0.610839	0.996076
hsa-miR-589-3p	1	1.01331	1.01773	1.03663	0.508276	1.06142			1	1.01713	1.02455	0.990512	0.474447	1.12167		1	0.987946	1.00478	1.06029	0.487608	1.06415		1	1.03485	1.02387	1.05909	0.562775	0.998442
hsa-miR-589-5p	1	1.01299	0.974136	1.00144	0.571078	0.984374			1	0.990029	0.929789	1.01725	0.562095	0.964698		1	1.03707	0.991484	1.00488	0.542385	0.973826		1	1.01187	1.00113	0.98219	0.608753	1.0146
hsa-miR-592	1	1.08426	1.00796	1.04245	0.475986	0.992459			1	1.19378	1.01638	1.167	0.434039	0.957658		1	0.991909	0.925688	0.981758	0.467357	0.905878		1	1.0671	1.08182	0.9786	0.526563	1.11384
hsa-miR-624-5p	1	1.06627	1.01657	1.01722	0.493188	1.00558			1	1.1415	0.973316	0.98537	0.433913	0.976542		1	1.01362	1.0074	1.0781	0.508157	0.995511		1	1.04369	1.069	0.988202	0.537495	1.04468
hsa-miR-628-5p	1	1.00995	0.997996	0.977462	0.598432	0.966898			1	1.02935	0.972694	0.969145	0.606746	0.921676		1	1.01394	1.01579	1.0032	0.575555	0.975202		1	0.986551	1.0055	0.960039	0.612997	1.00382
hsa-miR-629-5p	1	1.02651	0.989872	1.03493	0.658878	1.02122			1	1.02817	0.982275	1.0777	0.705833	1.04232		1	1.00898	0.963277	1.00616	0.585469	0.983447		1	1.04238	1.02406	1.02094	0.685333	1.03788
hsa-miR-636	1	1.02928	1.03896	1.02603	0.509823	1.03149			1	1.10236	1.09043	1.03646	0.490053	1.05509		1	0.957636	0.982254	1.01445	0.488869	1.00895		1	1.02785	1.04418	1.02717	0.550548	1.03045
hsa-miR-651-5p	1	1.00913	0.99104	1.0093	0.585798	1.01066			1	0.992904	0.961378	0.988345	0.583805	1.0172		1	1.01989	1.00588	1.03099	0.552295	1.01449		1	1.01459	1.00586	1.00856	0.621294	1.00028
hsa-miR-659-3p	1	1.05743	0.998171	1.05682	0.480494	1.06282			1	1.06013	0.934998	0.998555	0.410103	1.10559		1	1.03418	1.00072	1.12043	0.482525	1.05223		1	1.07798	1.05879	1.05147	0.548852	1.03064
hsa-miR-671-5p	1	1.02479	1.00495	1.03107	0.516466	1.02124			1	1.05006	1.02217	1.07451	0.496682	1.04181		1	0.989094	0.964704	0.998004	0.487261	0.984665		1	1.03521	1.02798	1.02069	0.565455	1.03726
hsa-miR-7-1-3p	1	0.937171	1.0086	0.975334	0.613679	0.951723			1	0.939907	1.14408	1.12471	0.71836	0.94328		1	0.934915	0.942933	0.830071	0.512214	0.915801		1	0.936691	0.9388	0.971226	0.610465	0.99609
hsa-miR-744-5p	1	0.957547	1.04691	0.938379	0.563164	0.95259			1	1.01144	1.13118	0.924702	0.594775	0.908507		1	0.940232	1.03992	0.937277	0.536247	0.991204		1	0.920972	0.969623	0.953156	0.558471	0.958059
hsa-miR-758-3p	1	0.997333	1.05042	1.08207	0.595078	1.12446			1	1.01819	1.18153	1.11642	0.645942	1.28535		1	0.919979	0.946423	0.996064	0.499296	1.07299		1	1.05384	1.02332	1.13373	0.639995	1.01503
hsa-miR-7-5p	1	0.985684	1.0337	1.06116	0.623867	1.12605			1	0.961034	1.089	0.988432	0.661788	1.27378		1	0.958266	1.00583	1.06642	0.543534	1.1352		1	1.03775	1.00627	1.12862	0.66628	0.969149
hsa-miR-767-5p	1	1.00694	1.05573	1.02394	0.489599	1.04429			1	1.07799	1.15437	1.03269	0.474709	1.09245		1	0.930739	0.984044	0.993916	0.463285	1.02852		1	1.01209	1.02877	1.0452	0.530804	1.0119
hsa-miR-874-3p	1	0.958797	1.03151	0.955268	0.558314	0.96564			1	0.988368	1.10648	0.960412	0.587055	0.940821		1	0.950669	1.0204	0.935434	0.522497	0.989748		1	0.937355	0.967654	0.969959	0.565389	0.966351
hsa-miR-877-3p	1	1.04128	1.06454	1.03124	0.668442	1.04877			1	1.15156	1.13502	1.01209	0.730759	1.08197		1	0.938638	0.994007	1.04145	0.605205	1.03394		1	1.03364	1.06458	1.04018	0.669362	1.03039
hsa-miR-885-5p	1	0.967297	1.04188	1.01884	0.611876	1.0323			1	0.995291	1.18325	1.0908	0.69303	1.09544		1	0.919311	0.957476	0.919092	0.516924	1.00212		1	0.98729	0.984903	1.04663	0.625675	0.999353
hsa-miR-887-3p	1	0.96729	1.03206	0.981581	0.544743	0.98932			1	0.998119	1.12601	1.01692	0.571246	0.994		1	0.942384	0.991647	0.930828	0.498968	0.988667		1	0.961367	0.978509	0.996996	0.564013	0.985293
hsa-miR-9-3p	1	0.943199	1.03071	0.960357	0.443053	0.981281			1	0.949103	1.11707	0.957942	0.419146	0.980887		1	0.946149	1.02172	0.932731	0.431136	1.01191		1	0.934345	0.953337	0.990397	0.478877	0.951051
hsa-miR-941	1	1.0092	0.999245	1.03632	0.648235	1.0671			1	0.969588	0.957973	0.946993	0.664149	1.13		1	1.0217	1.02761	1.09896	0.595747	1.09236		1	1.03632	1.01216	1.06302	0.68481	0.978932
hsa-miR-9-5p	1	0.956152	1.03401	0.975393	0.576175	1.00293			1	0.965318	1.10767	0.950861	0.610359	1.01844		1	0.950154	1.02551	0.966139	0.52887	1.03493		1	0.952982	0.968849	1.00918	0.589297	0.955419
hsa-miR-96-3p	1	1.03791	0.970643	1.01699	0.397728	0.976073			1	1.04547	0.93533	1.10172	0.324971	0.943044		1	1.03399	0.952717	0.978144	0.406017	0.925187		1	1.03428	1.02388	0.971105	0.462196	1.05999
hsa-miR-96-5p	1	1.00878	0.990865	1.03072	0.643777	1.04088			1	0.978261	0.969037	1.00864	0.673434	1.0848		1	1.01585	0.995708	1.04199	0.580526	1.03706		1	1.03223	1.00785	1.04154	0.67737	1.00078
hsa-miR-99a-3p	1	0.999786	1.02929	1.03059	0.666917	1.05614			1	1.01693	1.0799	1.01332	0.734707	1.11992		1	0.962296	0.993406	1.02018	0.584283	1.05129		1	1.02013	1.01456	1.05826	0.681763	0.997199
hsa-miR-99a-5p	1	1.02464	1.04295	1.03329	0.639689	1.0619			1	1.07545	1.0726	0.974893	0.672101	1.11308		1	0.965566	1.01279	1.06995	0.587898	1.06853		1	1.03289	1.04347	1.05503	0.659069	1.0041
hsa-miR-99b-3p	1	1.00693	0.975857	1.01862	0.692505	1.01937			1	0.959574	0.929431	0.99989	0.743599	1.03989		1	1.03727	1.00005	1.03621	0.619597	1.01981		1	1.02394	0.998085	1.01975	0.71432	0.998406
